# Supplementary material
Source: publisher figshare collection journal article supplement (https://gsajournals.figshare.com/articles/dataset/_/8024813)
Supplement: Supplementary file 1 [file 1]

## Sheet: S1 Data access & info
Table S1: Accession numbers and conditions of Microbotryum lychnidis-dioicae RNAseq data. More information are available at https://trace.ncbi.nlm.nih.gov/Traces/study/?acc=+PRJNA246470&go=go
BioSample	Experiment	Run	SRA_Sample	Sample_Name	Mating-type	Life stage	Replicate number	Growing condition
SAMN02767842	SRX1869833	SRR3709730	SRS1520427	Mated	a1 a2	dikaryon	1	Mated
SAMN05195057	SRX1870280	SRR3710480	SRS1520804	Mated replicate 2	a1 a2	dikaryon	2	Mated
SAMN02767845	SRX1819603	SRR3624826	SRS1483443	p1A1_Rich	a1	haploid	1	Rich medium
SAMN05195056	SRX1870283	SRR3710483	SRS1520808	p1A1_Rich replicate 2	a1	haploid	2	Rich medium
SAMN02767843	SRX1870284	SRR3710484	SRS1520809	p1A1_Water	a1	haploid	1	Water medium
SAMN05195059	SRX1870281	SRR3710481	SRS1520805	p1A1_Water replicate 2	a1	haploid	2	Water medium
SAMN02767841	SRX1870097	SRR3710080	SRS1520663	p1A2_Rich	a2	haploid	1	Rich medium
SAMN05195058	SRX1870285	SRR3710485	SRS1520810	p1A2_Rich replicate 2	a2	haploid	2	Rich medium
SAMN02767844	SRX1870282	SRR3710482	SRS1520807	p1A2_Water	a2	haploid	1	Water medium
SAMN05195060	SRX1870279	SRR3710479	SRS1520803	p1A2_Water replicate 2	a2	haploid	2	Water medium

## Sheet: S2 Pseudo-alignement infos
Table S2: Mapping statistics from Microbotryum lychnidis-dioicae RNAseq analyses using Kallisto
Mating-type of the predicted coding-sequence set used as reference in Kallisto	Sample_Name	Mating-type	Life stage	Replicate number	Growing condition	Percentage of reads pseudo-aligned	Numbers of predicted coding-sequences used in the reference (n_targets)	Number of bootstraps performed (n_bootstraps)	Number of reads used in the pseudo-alignment (n_processed)	Number of reads successfully pseudo-aligned (n_pseudoaligned)	Number of reads pseudo-aligned on a unique coding-sequence (n_unique)	Percentage of reads successfully pseudo-aligned (n_pseudoaligned)	Percentage of reads pseudo-aligned on a unique coding-sequence (n_unique)
a1	Mated	a1 a2	dikaryon	1	Mated	76.4	12254	100	35678375	27260962	25289194	76.4	70.9
	Mated replicate 2	a1 a2	dikaryon	2	Mated	73.9	12254	100	37445886	27677219	25594139	73.9	68.3
	p1A1_Rich	a1	haploid	1	Rich medium	68.8	12254	100	31929447	21959293	20874821	68.8	65.4
	p1A1_Rich replicate 2	a1	haploid	2	Rich medium	79.3	12254	100	40081476	31799809	30476949	79.3	76.0
	p1A1_Water	a1	haploid	1	Water medium	69.4	12254	100	36132000	25059258	23283618	69.4	64.4
	p1A1_Water replicate 2	a1	haploid	2	Water medium	70.8	12254	100	33439749	23667279	21916943	70.8	65.5
	p1A2_Rich	a2	haploid	1	Rich medium	80.9	12254	100	37679157	30488691	28982698	80.9	76.9
	p1A2_Rich replicate 2	a2	haploid	2	Rich medium	83.5	12254	100	35936071	30022733	28689737	83.5	79.8
	p1A2_Water	a2	haploid	1	Water medium	72.8	12254	100	33724171	24540110	22695250	72.8	67.3
	p1A2_Water replicate 2	a2	haploid	2	Water medium	68.6	12254	100	36310827	24926284	23103381	68.6	63.6
a2	Mated	a1 a2	dikaryon	1	Mated	76.5	12516	100	35678375	27278529	25212701	76.5	70.7
	Mated replicate 2	a1 a2	dikaryon	2	Mated	73.9	12516	100	37445886	27665124	25481635	73.9	68.0
	p1A1_Rich	a1	haploid	1	Rich medium	68.2	12516	100	31929447	21764964	20618403	68.2	64.6
	p1A1_Rich replicate 2	a1	haploid	2	Rich medium	78.8	12516	100	40081476	31577707	30163871	78.8	75.3
	p1A1_Water	a1	haploid	1	Water medium	61.1	12516	100	36132000	22074375	20359139	61.1	56.3
	p1A1_Water replicate 2	a1	haploid	2	Water medium	61.8	12516	100	33439749	20656817	19003454	61.8	56.8
	p1A2_Rich	a2	haploid	1	Rich medium	81.3	12516	100	37679157	30637194	29024738	81.3	77.0
	p1A2_Rich replicate 2	a2	haploid	2	Rich medium	84.0	12516	100	35936071	30172651	28747869	84.0	80.0
	p1A2_Water	a2	haploid	1	Water medium	77.4	12516	100	33724171	26099482	24079459	77.4	71.4
	p1A2_Water replicate 2	a2	haploid	2	Water medium	72.8	12516	100	36310827	26416791	24414941	72.8	67.2

## Sheet: S3 Putative functions
Table S3: Putative functions assigned to the Microbotryum lychnidis-dioicae genes, with their ID, their genomic compartment (autosome,
PAR-pseudo-autosomal regions, strata), whether they were inferred to be upregulated in haploid cells and whether they were inferred
to evolve under positive selection between mating types.
gene ID	genomic compartment	upregulated/non-upregulated	LRT result from PAML	ENOG ID	ENOG "functionnal" annotation
MvSl-1064-A1-R4_MC01-2g03007	AUTOSOME	upregulated	positive selection	ENOG41091VR	KH_domain
MvSl-1064-A1-R4_MC11g10414	AUTOSOME	upregulated	positive selection	ENOG41091GC	eRF1_domain_3
MvSl-1064-A1-R4_MC14g11963	AUTOSOME	upregulated	positive selection	ENOG410922S	MA3_domain
MvSl-1064-A1-R4_A1g00004	PAR	upregulated	no positive selection	ENOG41092NT	SWIB/MDM2_domain
MvSl-1064-A1-R4_A1g00006	PAR	upregulated	no positive selection	ENOG41093UN	Cytochrome_c_oxidase_subunit_Va
MvSl-1064-A1-R4_A1g00066	PAR	upregulated	no positive selection	ENOG41099E1	Ribosomal_L40e_family
MvSl-1064-A1-R4_A1g00077	PAR	upregulated	no positive selection	ENOG41091VR	KH_domain
MvSl-1064-A1-R4_A1g00078	PAR	upregulated	no positive selection	ENOG410949V	Ribosomal_L28e_protein_family
MvSl-1064-A1-R4_A1g00079	PAR	upregulated	no positive selection	ENOG41091M6	SNF2_family_N-terminal_domain
MvSl-1064-A1-R4_A1g00109	GREEN	upregulated	no positive selection	ENOG41093TP	RNA_recognition_motif._(a.k.a._RRM,_RBD,_or_RNP_domain)
MvSl-1064-A1-R4_A1g00126	PURPLE	upregulated	no positive selection	ENOG41093XW	Apolipoprotein_O
MvSl-1064-A1-R4_A1g00245	BLACK	upregulated	no positive selection	NA	NA
MvSl-1064-A1-R4_A1g00270	BLACK	upregulated	no positive selection	ENOG41091KX	Stereospecific_condensation_of_phosphoenolpyruvate_(PEP)_and_D-erythrose-4-phosphate_(E4P)_giving_rise_to_3-deoxy-D-_arabino-heptulosonate-7-phosphate_(DAHP)_(By_similarity)
MvSl-1064-A1-R4_A1g00292	BLACK	upregulated	no positive selection	ENOG41091Y6	ubiquitin_carboxyl-terminal_hydrolase
MvSl-1064-A1-R4_A1g00350	BLACK	upregulated	no positive selection	ENOG41095B1	NA
MvSl-1064-A1-R4_A1g00359	BLACK	upregulated	no positive selection	ENOG41092A5	Glyceraldehyde-3-phosphate_dehydrogenase
MvSl-1064-A1-R4_A1g00380	RED	upregulated	no positive selection	ENOG41095NC	Conidiation_protein_6
MvSl-1064-A1-R4_A1g00391	RED	upregulated	no positive selection	ENOG41091WJ	Inherit_from_fuNOG:_Coatomer_subunit_delta
MvSl-1064-A1-R4_A1g00394	RED	upregulated	no positive selection	ENOG41094CV	Mitochondrial_intermembrane_chaperone_that_participates_in_the_import_and_insertion_of_some_multi-pass_transmembrane_proteins_into_the_mitochondrial_inner_membrane._Also_required_for_the_transfer_of_beta-barrel_precursors_from_the_TOM_complex_to_the_sorting_and_assembly_machinery_(SAM_complex)_of_the_outer_membrane._Acts_as_a_chaperone-like_protein_that_protects_the_hydrophobic_precursors_from_ag…
MvSl-1064-A1-R4_A1g00398	RED	upregulated	no positive selection	ENOG41094S0	ATP_synthase_complex_subunit_h
MvSl-1064-A1-R4_A1g00399	RED	upregulated	no positive selection	ENOG41092WR	60s_ribosomal_protein
MvSl-1064-A1-R4_A1g00401	RED	upregulated	no positive selection	ENOG41091B8	40S_ribosomal_protein_S9
MvSl-1064-A1-R4_A1g00405	BLACK	upregulated	no positive selection	ENOG41093G8	WD_domain,_G-beta_repeat
MvSl-1064-A1-R4_A1g00505	BLACK	upregulated	no positive selection	ENOG41092G3	Alanine_dehydrogenase/PNT,_N-terminal_domain
MvSl-1064-A1-R4_A1g00506	BLACK	upregulated	no positive selection	ENOG410932S	Protein_of_unknown_function_DUF89
MvSl-1064-A1-R4_A1g00515	BLACK	upregulated	no positive selection	ENOG41091BX	Type_III_restriction_enzyme,_res_subunit
MvSl-1064-A1-R4_A1g00521	BLACK	upregulated	no positive selection	ENOG41092DQ	Hsp70_protein
MvSl-1064-A1-R4_A1g00534	BLACK	upregulated	no positive selection	ENOG41092EA	Malate_dehydrogenase
MvSl-1064-A1-R4_A1g00772	BLUE	upregulated	no positive selection	ENOG41093BR	Involved_in_the_small_subunit_(SSU)_processome_assembly_and_function,_and_in_the_18S_rRNA_synthesis._Required_for_the_early_cleavages_at_sites_A0,_A1_and_A2_(By_similarity)
MvSl-1064-A1-R4_A1g00794	BLACK	upregulated	no positive selection	ENOG41093X7	Splicing_factor_3B_subunit_10_(SF3b10)
MvSl-1064-A1-R4_A1g00911	BLACK	upregulated	no positive selection	ENOG41094NR	NADH-ubiquinone_oxidoreductase_B18_subunit_(NDUFB7)
MvSl-1064-A1-R4_A1g00970	BLUE	upregulated	no positive selection	ENOG410914U	t-complex_protein_1
MvSl-1064-A1-R4_A1g01017	PURPLE	upregulated	no positive selection	ENOG410911C	phosphatidylethanolamine_N-methyltransferase
MvSl-1064-A1-R4_A1g01136	BLACK	upregulated	no positive selection	ENOG41098GV	Domain_of_unknown_function_(DUF1996)
MvSl-1064-A1-R4_A1g01162	BLUE	upregulated	no positive selection	ENOG4109707	NA
MvSl-1064-A1-R4_A1g01174	BLACK	upregulated	no positive selection	ENOG41092PY	Choline-phosphate_cytidylyltransferase
MvSl-1064-A1-R4_A1g01184	BLACK	upregulated	no positive selection	ENOG41093M3	60Kd_inner_membrane_protein
MvSl-1064-A1-R4_A1g01227	PURPLE	upregulated	no positive selection	ENOG41092NC	60s_ribosomal_protein_l20
MvSl-1064-A1-R4_A1g01271	BLACK	upregulated	no positive selection	ENOG41093WH	Complex_1_protein_(LYR_family)
MvSl-1064-A1-R4_A1g01317	BLACK	upregulated	no positive selection	ENOG41091CW	Mitochondrial_carrier_protein
MvSl-1064-A1-R4_A1g01346	BLACK	upregulated	no positive selection	ENOG41092P3	Eukaryotic_elongation_factor_5A_hypusine,_DNA-binding_OB_fold
MvSl-1064-A1-R4_A1g01351	BLACK	upregulated	no positive selection	ENOG41091F5	Destroys_radicals_which_are_normally_produced_within_the_cells_and_which_are_toxic_to_biological_systems_(By_similarity)
MvSl-1064-A1-R4_A1g01369	BLACK	upregulated	no positive selection	ENOG41092E9	Thioredoxin
MvSl-1064-A1-R4_A1g01385	BLACK	upregulated	no positive selection	ENOG41093YW	A49-like_RNA_polymerase_I_associated_factor
MvSl-1064-A1-R4_A1g01388	BLACK	upregulated	no positive selection	ENOG4109147	Noc2p_family
MvSl-1064-A1-R4_A1g01406	BLACK	upregulated	no positive selection	ENOG41091FG	MT-A70
MvSl-1064-A1-R4_A1g01432	BLUE	upregulated	no positive selection	ENOG41093J1	dUTPase
MvSl-1064-A1-R4_A1g01470	PAR	upregulated	no positive selection	NA	NA
MvSl-1064-A1-R4_A1g01476	PAR	upregulated	no positive selection	NA	NA
MvSl-1064-A1-R4_A1g01489	PAR	upregulated	no positive selection	ENOG41093KZ	RNA_Polymerase
MvSl-1064-A1-R4_A1g01501	PAR	upregulated	no positive selection	ENOG41091Z2	adenosine_kinase
MvSl-1064-A1-R4_A1g01502	PAR	upregulated	no positive selection	ENOG41094QB	NA
MvSl-1064-A1-R4_MC01-1g01713	AUTOSOME	upregulated	no positive selection	ENOG4109370	Mitochondrial_branched-chain_alpha-ketoacid_dehydrogenase_kinase
MvSl-1064-A1-R4_MC01-1g01728	AUTOSOME	upregulated	no positive selection	ENOG41092HV	Spermidine_synthase
MvSl-1064-A1-R4_MC01-1g01731	AUTOSOME	upregulated	no positive selection	ENOG4109126	Aconitate_hydratase
MvSl-1064-A1-R4_MC01-1g01734	AUTOSOME	upregulated	no positive selection	ENOG41093DG	haspin_protein_kinase
MvSl-1064-A1-R4_MC01-1g01770	AUTOSOME	upregulated	no positive selection	ENOG410911X	The_proteasome_is_a_multicatalytic_proteinase_complex_which_is_characterized_by_its_ability_to_cleave_peptides_with_Arg,_Phe,_Tyr,_Leu,_and_Glu_adjacent_to_the_leaving_group_at_neutral_or_slightly_basic_pH._The_proteasome_has_an_ATP-dependent_proteolytic_activity_(By_similarity)
MvSl-1064-A1-R4_MC01-1g01797	AUTOSOME	upregulated	no positive selection	ENOG41093ZX	involved_in_rRNA_processing_(By_similarity)
MvSl-1064-A1-R4_MC01-1g01800	AUTOSOME	upregulated	no positive selection	ENOG41091RK	60s_ribosomal_protein_l11
MvSl-1064-A1-R4_MC01-1g01803	AUTOSOME	upregulated	no positive selection	ENOG410923R	60S_ribosomal_protein_L8
MvSl-1064-A1-R4_MC01-1g01811	AUTOSOME	upregulated	no positive selection	ENOG41092G4	NADPH_adrenodoxin_oxidoreductase,_mitochondrial
MvSl-1064-A1-R4_MC01-1g01844	AUTOSOME	upregulated	no positive selection	ENOG4109325	Inherit_from_fuNOG:_phosphoribosyltransferase
MvSl-1064-A1-R4_MC01-1g01849	AUTOSOME	upregulated	no positive selection	ENOG4109229	Component_of_the_eukaryotic_translation_initiation_factor_3_(eIF-3)_complex,_which_is_involved_in_protein_synthesis_and,_together_with_other_initiation_factors,_stimulates_binding_of_mRNA_and_methionyl-tRNAi_to_the_40S_ribosome_(By_similarity)
MvSl-1064-A1-R4_MC01-1g01852	AUTOSOME	upregulated	no positive selection	ENOG41092ZZ	emp24/gp25L/p24_family/GOLD
MvSl-1064-A1-R4_MC01-1g01858	AUTOSOME	upregulated	no positive selection	ENOG41095SP	Cgr1_family
MvSl-1064-A1-R4_MC01-1g01867	AUTOSOME	upregulated	no positive selection	ENOG41095AQ	Major_Facilitator_Superfamily
MvSl-1064-A1-R4_MC01-1g01877	AUTOSOME	upregulated	no positive selection	ENOG410949Z	Sin-like_protein_conserved_region
MvSl-1064-A1-R4_MC01-1g01879	AUTOSOME	upregulated	no positive selection	ENOG41093CV	Pfam:YDG_SRA
MvSl-1064-A1-R4_MC01-1g01882	AUTOSOME	upregulated	no positive selection	NA	NA
MvSl-1064-A1-R4_MC01-1g01883	AUTOSOME	upregulated	no positive selection	ENOG41093AQ	Inherit_from_fuNOG:_Hemoglobin_and_proliferation_regulated_protein
MvSl-1064-A1-R4_MC01-1g01887	AUTOSOME	upregulated	no positive selection	ENOG41095ED	HMG_(high_mobility_group)_box
MvSl-1064-A1-R4_MC01-1g01889	AUTOSOME	upregulated	no positive selection	ENOG410913S	The_proteasome_is_a_multicatalytic_proteinase_complex_which_is_characterized_by_its_ability_to_cleave_peptides_with_Arg,_Phe,_Tyr,_Leu,_and_Glu_adjacent_to_the_leaving_group_at_neutral_or_slightly_basic_pH._The_proteasome_has_an_ATP-dependent_proteolytic_activity_(By_similarity)
MvSl-1064-A1-R4_MC01-1g01899	AUTOSOME	upregulated	no positive selection	ENOG41095YX	Hyaluronan_/_mRNA_binding_family
MvSl-1064-A1-R4_MC01-1g01924	AUTOSOME	upregulated	no positive selection	ENOG41093BV	N_terminus_of_Rad21_/_Rec8_like_protein
MvSl-1064-A1-R4_MC01-1g01935	AUTOSOME	upregulated	no positive selection	ENOG4109109	Eukaryotic_translation_initiation_factor_eIF2A
MvSl-1064-A1-R4_MC01-1g01938	AUTOSOME	upregulated	no positive selection	ENOG41094U3	Dioxygenase
MvSl-1064-A1-R4_MC01-1g01939	AUTOSOME	upregulated	no positive selection	ENOG41093FV	Pfam:Muc_lac_enz
MvSl-1064-A1-R4_MC01-1g01940	AUTOSOME	upregulated	no positive selection	ENOG41095UG	NA
MvSl-1064-A1-R4_MC01-1g01941	AUTOSOME	upregulated	no positive selection	ENOG41093IH	Carboxymuconolactone_decarboxylase_family
MvSl-1064-A1-R4_MC01-1g01942	AUTOSOME	upregulated	no positive selection	ENOG41093SX	Hydrolyzes_D-tyrosyl-tRNA(Tyr)_into_D-tyrosine_and_free_tRNA(Tyr)._Could_be_a_defense_mechanism_against_a_harmful_effect_of_D-tyrosine_(By_similarity)
MvSl-1064-A1-R4_MC01-1g01946	AUTOSOME	upregulated	no positive selection	ENOG4109203	ACTIN
MvSl-1064-A1-R4_MC01-1g01953	AUTOSOME	upregulated	no positive selection	ENOG41093D1	NUDIX_domain
MvSl-1064-A1-R4_MC01-1g01954	AUTOSOME	upregulated	no positive selection	ENOG41096HP	FBOX
MvSl-1064-A1-R4_MC01-1g01955	AUTOSOME	upregulated	no positive selection	ENOG4109428	40S_ribosomal_protein_S25
MvSl-1064-A1-R4_MC01-1g01965	AUTOSOME	upregulated	no positive selection	ENOG4109464	DNA_replication
MvSl-1064-A1-R4_MC01-1g01995	AUTOSOME	upregulated	no positive selection	ENOG41091BR	Specifically_methylates_the_N1_position_of_guanosine-37_in_various_cytoplasmic_and_mitochondrial_tRNAs._Methylation_is_not_dependent_on_the_nature_of_the_nucleoside_5'_of_the_target_nucleoside._This_is_the_first_step_in_the_biosynthesis_of_wybutosine_(yW),_a_modified_base_adjacent_to_the_anticodon_of_tRNAs_and_required_for_accurate_decoding_(By_similarity)
MvSl-1064-A1-R4_MC01-1g02003	AUTOSOME	upregulated	no positive selection	ENOG41092MH	Secretory_pathway_protein_Sec39
MvSl-1064-A1-R4_MC01-1g02018	AUTOSOME	upregulated	no positive selection	ENOG41094DW	FH
MvSl-1064-A1-R4_MC01-1g02032	AUTOSOME	upregulated	no positive selection	ENOG41091TR	FAD_linked_oxidases,_C-terminal_domain
MvSl-1064-A1-R4_MC01-1g02037	AUTOSOME	upregulated	no positive selection	ENOG41094HZ	Shwachman-Bodian-Diamond_syndrome_(SBDS)_protein
MvSl-1064-A1-R4_MC01-1g02043	AUTOSOME	upregulated	no positive selection	ENOG41095WH	Microsomal_signal_peptidase_12_kDa_subunit_(SPC12)
MvSl-1064-A1-R4_MC01-1g02067	AUTOSOME	upregulated	no positive selection	ENOG410949X	Ribosomal_protein_L23
MvSl-1064-A1-R4_MC01-1g02075	AUTOSOME	upregulated	no positive selection	ENOG41093XZ	DNA_replication_origin_binding_protein
MvSl-1064-A1-R4_MC01-1g02077	AUTOSOME	upregulated	no positive selection	ENOG41093MC	RNA_polymerase_Rpb8
MvSl-1064-A1-R4_MC01-1g02079	AUTOSOME	upregulated	no positive selection	ENOG41093DX	WD_domain,_G-beta_repeat
MvSl-1064-A1-R4_MC01-1g02089	AUTOSOME	upregulated	no positive selection	ENOG41093VX	Shikimate_kinase
MvSl-1064-A1-R4_MC01-1g02090	AUTOSOME	upregulated	no positive selection	ENOG41094DJ	OHCU_decarboxylase
MvSl-1064-A1-R4_MC01-1g02104	AUTOSOME	upregulated	no positive selection	ENOG4109195	Ubiquitin-activating_enzyme_e1_C-terminal_domain
MvSl-1064-A1-R4_MC01-1g02111	AUTOSOME	upregulated	no positive selection	ENOG410974F	NA
MvSl-1064-A1-R4_MC01-1g02123	AUTOSOME	upregulated	no positive selection	ENOG41093PX	60S_ribosomal_protein_L22
MvSl-1064-A1-R4_MC01-1g02125	AUTOSOME	upregulated	no positive selection	ENOG41091GN	Ribosomal_protein_S3
MvSl-1064-A1-R4_MC01-1g02130	AUTOSOME	upregulated	no positive selection	ENOG41093VQ	tRNA_(guanine(9)-N(1))-methyltransferase_activity
MvSl-1064-A1-R4_MC01-1g02138	AUTOSOME	upregulated	no positive selection	ENOG41094JI	Pfam:NADH_ub_rd_NUML
MvSl-1064-A1-R4_MC01-1g02142	AUTOSOME	upregulated	no positive selection	ENOG41091BZ	alpha/beta_hydrolase_fold
MvSl-1064-A1-R4_MC01-1g02143	AUTOSOME	upregulated	no positive selection	ENOG41093NC	Cwf15/Cwc15_cell_cycle_control_protein
MvSl-1064-A1-R4_MC01-1g02145	AUTOSOME	upregulated	no positive selection	ENOG41092UY	Brix
MvSl-1064-A1-R4_MC01-1g02151	AUTOSOME	upregulated	no positive selection	ENOG4109512	Nucleotidyl_transferase
MvSl-1064-A1-R4_MC01-1g02158	AUTOSOME	upregulated	no positive selection	ENOG4109501	Nucleotidyl_transferase
MvSl-1064-A1-R4_MC01-1g02162	AUTOSOME	upregulated	no positive selection	ENOG410975X	NA
MvSl-1064-A1-R4_MC01-1g02163	AUTOSOME	upregulated	no positive selection	ENOG41092H9	K00823_4-aminobutyrate_aminotransferase_EC_2.6.1.19
MvSl-1064-A1-R4_MC01-1g02164	AUTOSOME	upregulated	no positive selection	ENOG410946F	Mitochondrial_39-S_ribosomal_protein_L47_(MRP-L47)
MvSl-1064-A1-R4_MC01-1g02170	AUTOSOME	upregulated	no positive selection	NA	NA
MvSl-1064-A1-R4_MC01-1g02184	AUTOSOME	upregulated	no positive selection	ENOG41094AJ	DnaJ
MvSl-1064-A1-R4_MC01-1g02190	AUTOSOME	upregulated	no positive selection	ENOG41091XN	tRNA_synthetases_class_I_(W_and_Y)
MvSl-1064-A1-R4_MC01-1g02192	AUTOSOME	upregulated	no positive selection	ENOG410938T	HDc
MvSl-1064-A1-R4_MC01-1g02194	AUTOSOME	upregulated	no positive selection	ENOG41094BZ	Sm
MvSl-1064-A1-R4_MC01-1g02197	AUTOSOME	upregulated	no positive selection	ENOG41093Z5	Component_of_the_cytosolic_iron-sulfur_(Fe_S)_protein_assembly_machinery._Required_for_the_maturation_of_extramitochondrial_Fe_S_proteins_(By_similarity)._Has_anti-_apoptotic_effects_in_the_cell._Involved_in_negative_control_of_H(2)O(2)-induced_cell_death,_probably_by_tethering_the_pro-_apoptotic_factor_TAH18_in_the_cytoplasm_in_the_absence_of_oxidative_stress_(By_similarity)
MvSl-1064-A1-R4_MC01-1g02233	AUTOSOME	upregulated	no positive selection	ENOG41091EM	C-4_methyl_sterol_oxidase
MvSl-1064-A1-R4_MC01-1g02235	AUTOSOME	upregulated	no positive selection	ENOG41094NH	Ribosomal_protein_S18
MvSl-1064-A1-R4_MC01-1g02250	AUTOSOME	upregulated	no positive selection	ENOG41091QW	KISc
MvSl-1064-A1-R4_MC01-1g02271	AUTOSOME	upregulated	no positive selection	ENOG41091EJ	ABC_transporter_transmembrane_region
MvSl-1064-A1-R4_MC01-1g02286	AUTOSOME	upregulated	no positive selection	ENOG41095B2	Possible_lysine_decarboxylase
MvSl-1064-A1-R4_MC01-1g02295	AUTOSOME	upregulated	no positive selection	ENOG4109465	Protein_of_unknown_function_(DUF2962)
MvSl-1064-A1-R4_MC01-1g02297	AUTOSOME	upregulated	no positive selection	ENOG4109410	ETC_complex_I_subunit_conserved_region
MvSl-1064-A1-R4_MC01-1g02298	AUTOSOME	upregulated	no positive selection	ENOG4109358	Catalyzes_the_NADPH-dependent_reduction_of_ketopantoate_into_pantoic_acid_(By_similarity)
MvSl-1064-A1-R4_MC01-1g02306	AUTOSOME	upregulated	no positive selection	ENOG41092SU	EFh
MvSl-1064-A1-R4_MC01-1g02309	AUTOSOME	upregulated	no positive selection	ENOG41093YM	Serine_hydrolase_(FSH1)
MvSl-1064-A1-R4_MC01-1g02313	AUTOSOME	upregulated	no positive selection	ENOG41091N0	Mitochondrial_GTPase_that_catalyzes_the_GTP-dependent_ribosomal_translocation_step_during_translation_elongation._During_this_step,_the_ribosome_changes_from_the_pre-translocational_(PRE)_to_the_post-translocational_(POST)_state_as_the_newly_formed_A-_site-bound_peptidyl-tRNA_and_P-site-bound_deacylated_tRNA_move_to_the_P_and_E_sites,_respectively._Catalyzes_the_coordinated_movement_of_the_two_tR…
MvSl-1064-A1-R4_MC01-1g02317	AUTOSOME	upregulated	no positive selection	ENOG410925C	Inherit_from_euNOG:_Histidine_kinase
MvSl-1064-A1-R4_MC01-1g02321	AUTOSOME	upregulated	no positive selection	ENOG41092MT	Ribosomal_protein_S18
MvSl-1064-A1-R4_MC01-1g02323	AUTOSOME	upregulated	no positive selection	ENOG41091PK	ATP-binding_RNA_helicase_involved_in_translation_initiation._Remodels_RNA_in_response_to_ADP_and_ATP_concentrations_by_facilitating_disruption,_but_also_formation_of_RNA_duplexes_(By_similarity)
MvSl-1064-A1-R4_MC01-1g02335	AUTOSOME	upregulated	no positive selection	ENOG41093TC	Inherit_from_fuNOG:_NTP_binding_protein
MvSl-1064-A1-R4_MC01-1g02342	AUTOSOME	upregulated	no positive selection	ENOG410969I	NA
MvSl-1064-A1-R4_MC01-1g02343	AUTOSOME	upregulated	no positive selection	ENOG41093J2	SNF5_/_SMARCB1_/_INI1
MvSl-1064-A1-R4_MC01-1g02355	AUTOSOME	upregulated	no positive selection	ENOG410919F	Fatty_acid
MvSl-1064-A1-R4_MC01-1g02374	AUTOSOME	upregulated	no positive selection	ENOG41095TQ	Inherit_from_fuNOG:_GDSL-like_Lipase/Acylhydrolase
MvSl-1064-A1-R4_MC01-1g02386	AUTOSOME	upregulated	no positive selection	ENOG41094R6	NA
MvSl-1064-A1-R4_MC01-1g02402	AUTOSOME	upregulated	no positive selection	ENOG410911V	Tetratricopeptide_repeat
MvSl-1064-A1-R4_MC01-1g02404	AUTOSOME	upregulated	no positive selection	ENOG41092E8	6-phosphofructo-2-kinase
MvSl-1064-A1-R4_MC01-1g02413	AUTOSOME	upregulated	no positive selection	ENOG41095JJ	Homeobox_domain
MvSl-1064-A1-R4_MC01-1g02427	AUTOSOME	upregulated	no positive selection	ENOG4109228	Alcohol_dehydrogenase_GroES-like_domain
MvSl-1064-A1-R4_MC01-1g02447	AUTOSOME	upregulated	no positive selection	ENOG410933X	Alanine_racemase,_N-terminal_domain
MvSl-1064-A1-R4_MC01-1g02450	AUTOSOME	upregulated	no positive selection	ENOG4109590	Rare_lipoprotein_A_(RlpA)-like_double-psi_beta-barrel
MvSl-1064-A1-R4_MC01-1g02453	AUTOSOME	upregulated	no positive selection	ENOG41092N0	ribosomal_protein_L19
MvSl-1064-A1-R4_MC01-1g02455	AUTOSOME	upregulated	no positive selection	ENOG41094BC	Rare_lipoprotein_A_(RlpA)-like_double-psi_beta-barrel
MvSl-1064-A1-R4_MC01-1g02471	AUTOSOME	upregulated	no positive selection	ENOG41096D1	NA
MvSl-1064-A1-R4_MC01-1g02479	AUTOSOME	upregulated	no positive selection	ENOG4109295	Heat_shock_protein
MvSl-1064-A1-R4_MC01-1g02480	AUTOSOME	upregulated	no positive selection	ENOG41093JV	ribosomal_protein
MvSl-1064-A1-R4_MC01-1g02481	AUTOSOME	upregulated	no positive selection	ENOG41099CA	Inherit_from_fuNOG:_Nuclear_polyadenylated_RNA-binding_protein
MvSl-1064-A1-R4_MC01-1g02483	AUTOSOME	upregulated	no positive selection	ENOG41091VF	Required_for_the_retention_of_luminal_endoplasmic_reticulum_proteins._Determines_the_specificity_of_the_luminal_ER_protein_retention_system._Also_required_for_normal_vesicular_traffic_through_the_Golgi_(By_similarity)
MvSl-1064-A1-R4_MC01-1g02486	AUTOSOME	upregulated	no positive selection	ENOG41094BN	Required_for_the_first_step_of_diphthamide_biosynthesis,_the_transfer_of_3-amino-3-carboxypropyl_from_S-adenosyl-L-_methionine_to_a_histidine_residue._Diphthamide_is_a_post-_translational_modification_of_histidine_which_occurs_in_elongation_factor_2_(By_similarity)
MvSl-1064-A1-R4_MC01-1g02487	AUTOSOME	upregulated	no positive selection	ENOG41093HR	SNARE-complex_protein_Syntaxin-18_N-terminus
MvSl-1064-A1-R4_MC01-1g02489	AUTOSOME	upregulated	no positive selection	ENOG41093IW	Inherit_from_fuNOG:_conserved_hypothetical_protein
MvSl-1064-A1-R4_MC01-1g02497	AUTOSOME	upregulated	no positive selection	ENOG41091QT	Tetrahydrofolate_dehydrogenase/cyclohydrolase,_catalytic_domain
MvSl-1064-A1-R4_MC01-1g02499	AUTOSOME	upregulated	no positive selection	ENOG41093PU	Inherit_from_fuNOG:_Glycoside_hydrolase_family_26_protein
MvSl-1064-A1-R4_MC01-1g02500	AUTOSOME	upregulated	no positive selection	ENOG41092JD	Glutamate_dehydrogenase
MvSl-1064-A1-R4_MC01-1g02501	AUTOSOME	upregulated	no positive selection	ENOG410924B	Cell_division_protein_48_(CDC48),_N-terminal_domain
MvSl-1064-A1-R4_MC01-1g02522	AUTOSOME	upregulated	no positive selection	ENOG41092KR	Inherit_from_fuNOG:_DNA_repair_protein_Rad50
MvSl-1064-A1-R4_MC01-1g02532	AUTOSOME	upregulated	no positive selection	ENOG4109493	HMG_(high_mobility_group)_box
MvSl-1064-A1-R4_MC01-1g02544	AUTOSOME	upregulated	no positive selection	ENOG4109269	t-complex_protein_1
MvSl-1064-A1-R4_MC01-1g02555	AUTOSOME	upregulated	no positive selection	ENOG41094P8	60S_ribosomal_protein_L29
MvSl-1064-A1-R4_MC01-1g02558	AUTOSOME	upregulated	no positive selection	ENOG4109317	40S_ribosomal_protein_S16
MvSl-1064-A1-R4_MC01-1g02559	AUTOSOME	upregulated	no positive selection	ENOG41092QI	ubiquitin_carboxyl-terminal_hydrolase
MvSl-1064-A1-R4_MC01-1g02560	AUTOSOME	upregulated	no positive selection	ENOG41093R6	TIP41-like_family
MvSl-1064-A1-R4_MC01-1g02568	AUTOSOME	upregulated	no positive selection	ENOG41092WT	60s_ribosomal_protein_l23
MvSl-1064-A1-R4_MC01-1g02571	AUTOSOME	upregulated	no positive selection	ENOG41093PW	Pfam:UPF0041
MvSl-1064-A1-R4_MC01-1g02584	AUTOSOME	upregulated	no positive selection	ENOG41094BE	Fungal_specific_transcription_factor_domain
MvSl-1064-A1-R4_MC01-1g02600	AUTOSOME	upregulated	no positive selection	NA	NA
MvSl-1064-A1-R4_MC01-1g02607	AUTOSOME	upregulated	no positive selection	ENOG41093SJ	Translin_family
MvSl-1064-A1-R4_MC01-1g02624	AUTOSOME	upregulated	no positive selection	ENOG41092VE	Splicing_factor_u2af-associated_protein_2
MvSl-1064-A1-R4_MC01-1g02632	AUTOSOME	upregulated	no positive selection	NA	NA
MvSl-1064-A1-R4_MC01-1g02635	AUTOSOME	upregulated	no positive selection	ENOG410930N	Rad52/22_family_double-strand_break_repair_protein
MvSl-1064-A1-R4_MC01-1g02640	AUTOSOME	upregulated	no positive selection	NA	NA
MvSl-1064-A1-R4_MC01-1g02644	AUTOSOME	upregulated	no positive selection	ENOG410924K	Component_of_the_FACT_complex,_a_general_chromatin_factor_that_acts_to_reorganize_nucleosomes._The_FACT_complex_is_involved_in_multiple_processes_that_require_DNA_as_a_template_such_as_mRNA_elongation,_DNA_replication_and_DNA_repair._During_transcription_elongation_the_FACT_complex_acts_as_a_histone_chaperone_that_both_destabilizes_and_restores_nucleosomal_structure._It_facilitates_the_passage_of…
MvSl-1064-A1-R4_MC01-1g02648	AUTOSOME	upregulated	no positive selection	ENOG41093ZA	GlcNAc-PI_de-N-acetylase
MvSl-1064-A1-R4_MC01-1g02657	AUTOSOME	upregulated	no positive selection	ENOG41091EZ	ATP_synthase_alpha/beta_chain,_C_terminal_domain
MvSl-1064-A1-R4_MC01-1g02670	AUTOSOME	upregulated	no positive selection	NA	NA
MvSl-1064-A1-R4_MC01-1g02679	AUTOSOME	upregulated	no positive selection	ENOG410935H	PPIC-type_PPIASE_domain
MvSl-1064-A1-R4_MC01-1g02749	AUTOSOME	upregulated	no positive selection	ENOG410917T	Eukaryotic_porin
MvSl-1064-A1-R4_MC01-1g02763	AUTOSOME	upregulated	no positive selection	ENOG410963E	Lipase_(class_3)
MvSl-1064-A1-R4_MC01-1g02768	AUTOSOME	upregulated	no positive selection	ENOG41096UD	50S_ribosomal_protein_L35
MvSl-1064-A1-R4_MC01-1g02802	AUTOSOME	upregulated	no positive selection	ENOG41091HD	Mitochondrial_ornithine_transporter_1
MvSl-1064-A1-R4_MC01-1g02809	AUTOSOME	upregulated	no positive selection	ENOG41091Y9	CAMSAP_CH_domain
MvSl-1064-A1-R4_MC01-1g02817	AUTOSOME	upregulated	no positive selection	ENOG410912K	Involved_in_proper_cytoplasmic_distribution_of_mitochondria_(By_similarity)
MvSl-1064-A1-R4_MC01-1g02822	AUTOSOME	upregulated	no positive selection	ENOG41092GG	tRNA_synthetases_class_II_core_domain_(F)
MvSl-1064-A1-R4_MC01-1g02851	AUTOSOME	upregulated	no positive selection	ENOG41095UF	Transcription_factor_Pcc1
MvSl-1064-A1-R4_MC01-2g02991	AUTOSOME	upregulated	no positive selection	ENOG41093T1	ribosomal_protein
MvSl-1064-A1-R4_MC01-2g02994	AUTOSOME	upregulated	no positive selection	ENOG41091SC	Major_Facilitator_Superfamily
MvSl-1064-A1-R4_MC01-2g02996	AUTOSOME	upregulated	no positive selection	ENOG4109296	This_protein_promotes_the_GTP-dependent_binding_of_aminoacyl-tRNA_to_the_A-site_of_ribosomes_during_protein_biosynthesis
MvSl-1064-A1-R4_MC01-2g03003	AUTOSOME	upregulated	no positive selection	ENOG41092GA	ADP_ATP_carrier
MvSl-1064-A1-R4_MC01-2g03018	AUTOSOME	upregulated	no positive selection	ENOG41092X6	60S_ribosomal_protein_L32
MvSl-1064-A1-R4_MC01-2g03020	AUTOSOME	upregulated	no positive selection	ENOG41092Y7	RNA_polymerase_III_subunit_Rpc25
MvSl-1064-A1-R4_MC01-2g03021	AUTOSOME	upregulated	no positive selection	ENOG41091IX	KISc
MvSl-1064-A1-R4_MC01-2g03030	AUTOSOME	upregulated	no positive selection	ENOG41092ZB	ribosomal_protein_L13
MvSl-1064-A1-R4_MC01-2g03037	AUTOSOME	upregulated	no positive selection	ENOG41091R1	Hsp90_protein
MvSl-1064-A1-R4_MC01-2g03040	AUTOSOME	upregulated	no positive selection	ENOG41093ZD	CS_domain
MvSl-1064-A1-R4_MC01-2g03041	AUTOSOME	upregulated	no positive selection	ENOG41091IW	Translation_initiation_factor
MvSl-1064-A1-R4_MC01-2g03050	AUTOSOME	upregulated	no positive selection	ENOG41092GN	CCR4-Not_complex_component,_Not1
MvSl-1064-A1-R4_MC01-2g03051	AUTOSOME	upregulated	no positive selection	ENOG41094GC	ATP_synthase_j_chain
MvSl-1064-A1-R4_MC01-2g03052	AUTOSOME	upregulated	no positive selection	ENOG41091E7	Mitochondrial_carrier_protein
MvSl-1064-A1-R4_MC01-2g03055	AUTOSOME	upregulated	no positive selection	ENOG4109279	Proteasome_regulatory_subunit
MvSl-1064-A1-R4_MC01-2g03057	AUTOSOME	upregulated	no positive selection	ENOG4109408	Involved_in_the_biogenesis_of_the_60S_ribosomal_subunit_(By_similarity)
MvSl-1064-A1-R4_MC01-2g03065	AUTOSOME	upregulated	no positive selection	ENOG410915V	Fn3-like_domain_(DUF1034)
MvSl-1064-A1-R4_MC01-2g03079	AUTOSOME	upregulated	no positive selection	ENOG410937G	mitochondrial_54S_ribosomal_protein_YmL38_YmL34
MvSl-1064-A1-R4_MC01-2g03083	AUTOSOME	upregulated	no positive selection	ENOG410982B	UBCc
MvSl-1064-A1-R4_MC01-2g03084	AUTOSOME	upregulated	no positive selection	NA	NA
MvSl-1064-A1-R4_MC01-2g03086	AUTOSOME	upregulated	no positive selection	ENOG41097XC	Aldo/keto_reductase_family
MvSl-1064-A1-R4_MC01-2g03100	AUTOSOME	upregulated	no positive selection	ENOG41097N3	NA
MvSl-1064-A1-R4_MC01-2g03110	AUTOSOME	upregulated	no positive selection	ENOG41094G6	Ribosomal_protein_L34
MvSl-1064-A1-R4_MC01-2g03112	AUTOSOME	upregulated	no positive selection	ENOG410951J	Inherit_from_fuNOG:_flavin-containing_amine_oxidasedehydrogenase
MvSl-1064-A1-R4_MC01-2g03113	AUTOSOME	upregulated	no positive selection	ENOG41094IU	NA
MvSl-1064-A1-R4_MC01-2g03117	AUTOSOME	upregulated	no positive selection	ENOG41099B6	Major_Facilitator_Superfamily
MvSl-1064-A1-R4_MC01-2g03136	AUTOSOME	upregulated	no positive selection	ENOG41091FC	The_proteasome_is_a_multicatalytic_proteinase_complex_which_is_characterized_by_its_ability_to_cleave_peptides_with_Arg,_Phe,_Tyr,_Leu,_and_Glu_adjacent_to_the_leaving_group_at_neutral_or_slightly_basic_pH._The_proteasome_has_an_ATP-dependent_proteolytic_activity_(By_similarity)
MvSl-1064-A1-R4_MC01-2g03138	AUTOSOME	upregulated	no positive selection	ENOG410924U	Pyridine_nucleotide-disulphide_oxidoreductase
MvSl-1064-A1-R4_MC01-2g03141	AUTOSOME	upregulated	no positive selection	ENOG410923I	WD_domain,_G-beta_repeat
MvSl-1064-A1-R4_MC01-2g03155	AUTOSOME	upregulated	no positive selection	ENOG41094MV	Mitochondrial_ATP_synthase_epsilon_chain
MvSl-1064-A1-R4_MC02g03192	AUTOSOME	upregulated	no positive selection	ENOG410931D	Alg9-like_mannosyltransferase_family
MvSl-1064-A1-R4_MC02g03202	AUTOSOME	upregulated	no positive selection	ENOG41093P1	Replication_protein_A_C_terminal
MvSl-1064-A1-R4_MC02g03207	AUTOSOME	upregulated	no positive selection	ENOG41092GJ	YIF1
MvSl-1064-A1-R4_MC02g03214	AUTOSOME	upregulated	no positive selection	ENOG41091CQ	Ubiquitin-activating_enzyme_active_site
MvSl-1064-A1-R4_MC02g03218	AUTOSOME	upregulated	no positive selection	ENOG410940P	Sm
MvSl-1064-A1-R4_MC02g03219	AUTOSOME	upregulated	no positive selection	ENOG41094PB	3'_exoribonuclease_family,_domain_1
MvSl-1064-A1-R4_MC02g03225	AUTOSOME	upregulated	no positive selection	ENOG41094PD	Protein_of_unknown_function_(DUF3602)
MvSl-1064-A1-R4_MC02g03226	AUTOSOME	upregulated	no positive selection	ENOG41092PZ	Core_component_of_nucleosome._Nucleosomes_wrap_and_compact_DNA_into_chromatin,_limiting_DNA_accessibility_to_the_cellular_machineries_which_require_DNA_as_a_template._Histones_thereby_play_a_central_role_in_transcription_regulation,_DNA_repair,_DNA_replication_and_chromosomal_stability._DNA_accessibility_is_regulated_via_a_complex_set_of_post-translational_modifications_of_histones,_also_called_h…
MvSl-1064-A1-R4_MC02g03231	AUTOSOME	upregulated	no positive selection	ENOG41091UU	DNA_polymerase_activity
MvSl-1064-A1-R4_MC02g03232	AUTOSOME	upregulated	no positive selection	ENOG4109448	3'_exoribonuclease_family,_domain_1
MvSl-1064-A1-R4_MC02g03236	AUTOSOME	upregulated	no positive selection	ENOG41095HH	Sec61beta_family
MvSl-1064-A1-R4_MC02g03250	AUTOSOME	upregulated	no positive selection	ENOG410912F	Clathrin,_heavy-chain_linker
MvSl-1064-A1-R4_MC02g03251	AUTOSOME	upregulated	no positive selection	ENOG410917Z	DEAD/DEAH_box_helicase
MvSl-1064-A1-R4_MC02g03267	AUTOSOME	upregulated	no positive selection	ENOG41094IR	Tubulin_binding_cofactor_A
MvSl-1064-A1-R4_MC02g03277	AUTOSOME	upregulated	no positive selection	ENOG41090ZY	mRNA_export_factor_elf1
MvSl-1064-A1-R4_MC02g03278	AUTOSOME	upregulated	no positive selection	ENOG41093A8	Electron_carrier_protein._The_oxidized_form_of_the_cytochrome_c_heme_group_can_accept_an_electron_from_the_heme_group_of_the_cytochrome_c1_subunit_of_cytochrome_reductase._Cytochrome_c_then_transfers_this_electron_to_the_cytochrome_oxidase_complex,_the_final_protein_carrier_in_the_mitochondrial_electron-transport_chain_(By_similarity)
MvSl-1064-A1-R4_MC02g03279	AUTOSOME	upregulated	no positive selection	ENOG41092JT	release_factor
MvSl-1064-A1-R4_MC02g03291	AUTOSOME	upregulated	no positive selection	ENOG41093FK	40S_ribosomal_protein_S24
MvSl-1064-A1-R4_MC02g03295	AUTOSOME	upregulated	no positive selection	ENOG41092DS	Heterotrimeric_G_protein_alpha_subunit_B
MvSl-1064-A1-R4_MC02g03296	AUTOSOME	upregulated	no positive selection	ENOG4109220	Fatty_acid_hydroxylase_superfamily
MvSl-1064-A1-R4_MC02g03300	AUTOSOME	upregulated	no positive selection	ENOG41094SK	Mitochondrial_ribosomal_protein_L37
MvSl-1064-A1-R4_MC02g03309	AUTOSOME	upregulated	no positive selection	ENOG41093UM	Sm
MvSl-1064-A1-R4_MC02g03325	AUTOSOME	upregulated	no positive selection	ENOG410930P	thymidylate_kinase
MvSl-1064-A1-R4_MC02g03330	AUTOSOME	upregulated	no positive selection	ENOG41091YD	Produces_ATP_from_ADP_in_the_presence_of_a_proton_gradient_across_the_membrane_(By_similarity)
MvSl-1064-A1-R4_MC02g03334	AUTOSOME	upregulated	no positive selection	ENOG410958B	NA
MvSl-1064-A1-R4_MC02g03335	AUTOSOME	upregulated	no positive selection	ENOG410917Q	Cys/Met_metabolism_PLP-dependent_enzyme
MvSl-1064-A1-R4_MC02g03337	AUTOSOME	upregulated	no positive selection	NA	NA
MvSl-1064-A1-R4_MC02g03379	AUTOSOME	upregulated	no positive selection	ENOG410968D	NA
MvSl-1064-A1-R4_MC02g03457	AUTOSOME	upregulated	no positive selection	ENOG410930R	Common_component_of_the_spliceosome_and_rRNA_processing_machinery._In_association_with_the_spliceosomal_U4_U6.U5_tri-snRNP_particle,_required_for_splicing_of_pre-mRNA._In_association_with_box_C_D_snoRNPs,_required_for_processing_of_pre-ribosomal_RNA_(rRNA)_and_site-specific_2'-O-methylation_of_substrate_RNAs._Essential_for_the_accumulation_and_stability_of_U4_snRNA,_U6_snRNA,_and_box_C_D_snoRNAs_…
MvSl-1064-A1-R4_MC02g03505	AUTOSOME	upregulated	no positive selection	ENOG41093B6	Macro_domain
MvSl-1064-A1-R4_MC02g03506	AUTOSOME	upregulated	no positive selection	ENOG41095V3	DASH_complex_subunit_Dad2
MvSl-1064-A1-R4_MC02g03529	AUTOSOME	upregulated	no positive selection	ENOG41091Q6	Inherit_from_fuNOG:_SCY1_protein_kinase
MvSl-1064-A1-R4_MC02g03530	AUTOSOME	upregulated	no positive selection	ENOG41091NC	AAA_domain_(dynein-related_subfamily)
MvSl-1064-A1-R4_MC02g03538	AUTOSOME	upregulated	no positive selection	ENOG41093W7	mitochondrial_37S_ribosomal_protein_MRP2
MvSl-1064-A1-R4_MC02g03547	AUTOSOME	upregulated	no positive selection	ENOG410942H	MAPEG_family
MvSl-1064-A1-R4_MC02g03563	AUTOSOME	upregulated	no positive selection	NA	NA
MvSl-1064-A1-R4_MC02g03576	AUTOSOME	upregulated	no positive selection	ENOG41092XE	Activator_of_Hsp90_ATPase_homolog_1-like_protein
MvSl-1064-A1-R4_MC02g03582	AUTOSOME	upregulated	no positive selection	ENOG41091YB	Catalyzes_the_reversible_transfer_of_the_terminal_phosphate_group_between_ATP_and_AMP._Plays_an_important_role_in_cellular_energy_homeostasis_and_in_adenine_nucleotide_metabolism._Adenylate_kinase_activity_is_critical_for_regulation_of_the_phosphate_utilization_and_the_AMP_de_novo_biosynthesis_pathways_(By_similarity)
MvSl-1064-A1-R4_MC02g03586	AUTOSOME	upregulated	no positive selection	ENOG41095NV	Spc24_subunit_of_Ndc80
MvSl-1064-A1-R4_MC02g03599	AUTOSOME	upregulated	no positive selection	ENOG41092G7	DNA_replication_factor_Dna2
MvSl-1064-A1-R4_MC02g03600	AUTOSOME	upregulated	no positive selection	ENOG41093BM	component_of_the_PAM_complex,_a_complex_required_for_the_translocation_of_transit_peptide-containing_proteins_from_the_inner_membrane_into_the_mitochondrial_matrix_in_an_ATP-dependent_manner_(By_similarity)
MvSl-1064-A1-R4_MC02g03608	AUTOSOME	upregulated	no positive selection	ENOG410924T	Transketolase,_thiamine_diphosphate_binding_domain
MvSl-1064-A1-R4_MC02g03629	AUTOSOME	upregulated	no positive selection	ENOG41096SZ	NA
MvSl-1064-A1-R4_MC02g03633	AUTOSOME	upregulated	no positive selection	ENOG41094GI	Ubiquinol-cytochrome_C_reductase,_UQCRX/QCR9_like
MvSl-1064-A1-R4_MC02g03635	AUTOSOME	upregulated	no positive selection	ENOG410925X	Component_of_the_eukaryotic_translation_initiation_factor_3_(eIF-3)_complex,_which_is_involved_in_protein_synthesis_and,_together_with_other_initiation_factors,_stimulates_binding_of_mRNA_and_methionyl-tRNAi_to_the_40S_ribosome_(By_similarity)
MvSl-1064-A1-R4_MC02g03645	AUTOSOME	upregulated	no positive selection	ENOG41092P7	KH
MvSl-1064-A1-R4_MC02g03659	AUTOSOME	upregulated	no positive selection	ENOG4109344	Glutathione_S-transferase,_C-terminal_domain
MvSl-1064-A1-R4_MC02g03666	AUTOSOME	upregulated	no positive selection	ENOG41091ST	adenosylhomocysteinase
MvSl-1064-A1-R4_MC02g03679	AUTOSOME	upregulated	no positive selection	ENOG41095Y6	NA
MvSl-1064-A1-R4_MC02g03687	AUTOSOME	upregulated	no positive selection	ENOG41093KB	polynucleotide_5'-hydroxyl-kinase_activity
MvSl-1064-A1-R4_MC02g03688	AUTOSOME	upregulated	no positive selection	ENOG41091NX	Interconversion_of_serine_and_glycine_(By_similarity)
MvSl-1064-A1-R4_MC02g03689	AUTOSOME	upregulated	no positive selection	ENOG41099AJ	RNA_recognition_motif._(a.k.a._RRM,_RBD,_or_RNP_domain)
MvSl-1064-A1-R4_MC02g03690	AUTOSOME	upregulated	no positive selection	ENOG41092PH	60S_ribosomal_protein_L18
MvSl-1064-A1-R4_MC02g03696	AUTOSOME	upregulated	no positive selection	ENOG41091HA	NMDA_receptor-regulated_protein_1
MvSl-1064-A1-R4_MC02g03733	AUTOSOME	upregulated	no positive selection	ENOG410922J	E1-E2_ATPase
MvSl-1064-A1-R4_MC02g03734	AUTOSOME	upregulated	no positive selection	ENOG4109518	RmlD_substrate_binding_domain
MvSl-1064-A1-R4_MC02g03739	AUTOSOME	upregulated	no positive selection	ENOG4109396	60S_ribosomal_protein_L24
MvSl-1064-A1-R4_MC02g03740	AUTOSOME	upregulated	no positive selection	NA	NA
MvSl-1064-A1-R4_MC02g03744	AUTOSOME	upregulated	no positive selection	ENOG4109436	60S_ribosomal_protein_l38
MvSl-1064-A1-R4_MC02g03748	AUTOSOME	upregulated	no positive selection	ENOG41091WA	NOL1/NOP2/sun_family
MvSl-1064-A1-R4_MC02g03753	AUTOSOME	upregulated	no positive selection	ENOG41091W4	Thiolase,_N-terminal_domain
MvSl-1064-A1-R4_MC02g03764	AUTOSOME	upregulated	no positive selection	ENOG410934Q	Ribosomal_protein_S19
MvSl-1064-A1-R4_MC02g03777	AUTOSOME	upregulated	no positive selection	ENOG41092XH	Enoyl-CoA_hydratase/isomerase_family
MvSl-1064-A1-R4_MC02g03783	AUTOSOME	upregulated	no positive selection	ENOG41091JQ	haloacid_dehalogenase-like_hydrolase
MvSl-1064-A1-R4_MC02g03796	AUTOSOME	upregulated	no positive selection	ENOG41091Q0	Inherit_from_fuNOG:_mRNA_processing_protein
MvSl-1064-A1-R4_MC02g03797	AUTOSOME	upregulated	no positive selection	ENOG41094FE	DUF2407_ubiquitin-like_domain
MvSl-1064-A1-R4_MC02g03799	AUTOSOME	upregulated	no positive selection	ENOG41096P7	NA
MvSl-1064-A1-R4_MC02g03809	AUTOSOME	upregulated	no positive selection	ENOG410922E	ATP-dependent_RNA_helicase_involved_in_40S_ribosomal_subunit_biogenesis._Required_for_the_processing_and_cleavage_of_35S_pre-rRNA_at_sites_A0,_A1,_and_A2,_leading_to_mature_18S_rRNA_(By_similarity)
MvSl-1064-A1-R4_MC02g03822	AUTOSOME	upregulated	no positive selection	ENOG410942M	60S_acidic_ribosomal_protein
MvSl-1064-A1-R4_MC02g03830	AUTOSOME	upregulated	no positive selection	ENOG41091ZS	DNA_mismatch_repair_protein_MSH2
MvSl-1064-A1-R4_MC02g03833	AUTOSOME	upregulated	no positive selection	ENOG41099DT	PGAM
MvSl-1064-A1-R4_MC02g03853	AUTOSOME	upregulated	no positive selection	ENOG41093EB	Component_of_the_nascent_polypeptide-associated_complex_(NAC),_a_dynamic_component_of_the_ribosomal_exit_tunnel,_protecting_the_emerging_polypeptides_from_interaction_with_other_cytoplasmic_proteins_to_ensure_appropriate_nascent_protein_targeting_(By_similarity)._The_NAC_complex_also_promotes_mitochondrial_protein_import_by_enhancing_productive_ribosome_interactions_with_the_outer_mitochondrial_m…
MvSl-1064-A1-R4_MC02g03865	AUTOSOME	upregulated	no positive selection	ENOG4109371	ubiquitin-conjugating_enzyme
MvSl-1064-A1-R4_MC02g03868	AUTOSOME	upregulated	no positive selection	ENOG41091K5	Inherit_from_fuNOG:_26S_proteasome_regulatory_subunit
MvSl-1064-A1-R4_MC02g03869	AUTOSOME	upregulated	no positive selection	ENOG41095Q4	Protein_of_unknown_function_(DUF2611)
MvSl-1064-A1-R4_MC02g03895	AUTOSOME	upregulated	no positive selection	NA	NA
MvSl-1064-A1-R4_MC02g03896	AUTOSOME	upregulated	no positive selection	NA	NA
MvSl-1064-A1-R4_MC02g03906	AUTOSOME	upregulated	no positive selection	ENOG41091UC	Thioredoxin_reductase
MvSl-1064-A1-R4_MC02g03907	AUTOSOME	upregulated	no positive selection	ENOG41095U6	Nnf1
MvSl-1064-A1-R4_MC02g03908	AUTOSOME	upregulated	no positive selection	ENOG410946G	Mitochondrial_ribosomal_subunit_protein
MvSl-1064-A1-R4_MC02g03909	AUTOSOME	upregulated	no positive selection	ENOG41091CI	glucose-6-phosphate_isomerase
MvSl-1064-A1-R4_MC02g03911	AUTOSOME	upregulated	no positive selection	ENOG41092TK	Surface_antigen
MvSl-1064-A1-R4_MC02g03913	AUTOSOME	upregulated	no positive selection	ENOG41099ED	SPX_domain
MvSl-1064-A1-R4_MC02g03916	AUTOSOME	upregulated	no positive selection	ENOG4109155	Ribosomal_protein_L15
MvSl-1064-A1-R4_MC02g03931	AUTOSOME	upregulated	no positive selection	ENOG41091S9	Component_of_the_post-replicative_DNA_mismatch_repair_system_(MMR)._Heterodimerizes_with_MSH2_to_form_MutS_beta,_which_binds_to_DNA_mismatches_thereby_initiating_DNA_repair._MSH3_provides_substrate-binding_and_substrate-specificity_to_the_complex._When_bound,_the_MutS_beta_heterodimer_bends_the_DNA_helix_and_shields_approximately_20_base_pairs._Acts_mainly_to_repair_insertion-deletion_loops_(IDLs…
MvSl-1064-A1-R4_MC02g03932	AUTOSOME	upregulated	no positive selection	ENOG41092DU	UbiA_prenyltransferase_family
MvSl-1064-A1-R4_MC02g03936	AUTOSOME	upregulated	no positive selection	ENOG41092NE	ATP12_chaperone_protein
MvSl-1064-A1-R4_MC02g03950	AUTOSOME	upregulated	no positive selection	ENOG410966R	CFEM_domain
MvSl-1064-A1-R4_MC02g03963	AUTOSOME	upregulated	no positive selection	ENOG41092F3	MCM
MvSl-1064-A1-R4_MC02g03978	AUTOSOME	upregulated	no positive selection	ENOG410976I	Inherit_from_fuNOG:_acetyltransferase
MvSl-1064-A1-R4_MC02g03980	AUTOSOME	upregulated	no positive selection	ENOG41093QQ	Centromeric_DNA_binding_protein
MvSl-1064-A1-R4_MC02g03981	AUTOSOME	upregulated	no positive selection	ENOG41091YI	DnaJ_central_domain
MvSl-1064-A1-R4_MC02g03982	AUTOSOME	upregulated	no positive selection	ENOG41091EE	Catalytic_component_of_the_histone_acetylase_B_(HAT-B)_complex._Acetylates_'Lys-12'_of_histone_H4_which_is_required_for_telomeric_silencing._Has_intrinsic_substrate_specificity_that_modifies_lysine_in_recognition_sequence_GXGKXG._Involved_in_DNA_double-strand_break_repair_(By_similarity)
MvSl-1064-A1-R4_MC02g03983	AUTOSOME	upregulated	no positive selection	ENOG41094H7	40S_ribosomal_protein_S30
MvSl-1064-A1-R4_MC02g03984	AUTOSOME	upregulated	no positive selection	ENOG410912K	Involved_in_proper_cytoplasmic_distribution_of_mitochondria_(By_similarity)
MvSl-1064-A1-R4_MC02g03987	AUTOSOME	upregulated	no positive selection	ENOG410917R	Component_of_the_eukaryotic_translation_initiation_factor_3_(eIF-3)_complex,_which_is_involved_in_protein_synthesis_and,_together_with_other_initiation_factors,_stimulates_binding_of_mRNA_and_methionyl-tRNAi_to_the_40S_ribosome_(By_similarity)
MvSl-1064-A1-R4_MC02g03989	AUTOSOME	upregulated	no positive selection	ENOG4109306	Pfam:RNA_pol_Rpb7_N
MvSl-1064-A1-R4_MC02g03990	AUTOSOME	upregulated	no positive selection	ENOG41093KU	Pfam:DUF2044
MvSl-1064-A1-R4_MC02g03992	AUTOSOME	upregulated	no positive selection	ENOG41095UN	Inherit_from_fuNOG:_CCCH_zinc_finger_DNA_binding_protein
MvSl-1064-A1-R4_MC02g04004	AUTOSOME	upregulated	no positive selection	ENOG41093UH	mitochondrial_37S_ribosomal_protein_YmS18
MvSl-1064-A1-R4_MC02g04009	AUTOSOME	upregulated	no positive selection	ENOG41097TH	NA
MvSl-1064-A1-R4_MC02g04010	AUTOSOME	upregulated	no positive selection	ENOG410966Q	NA
MvSl-1064-A1-R4_MC02g04021	AUTOSOME	upregulated	no positive selection	ENOG41091R2	Essential_component_of_the_TIM22_complex,_a_complex_that_mediates_the_import_and_insertion_of_multi-pass_transmembrane_proteins_into_the_mitochondrial_inner_membrane._The_TIM22_complex_forms_a_twin-pore_translocase_that_uses_the_membrane_potential_as_external_driving_force_(By_similarity)
MvSl-1064-A1-R4_MC02g04034	AUTOSOME	upregulated	no positive selection	ENOG41093HS	NA
MvSl-1064-A1-R4_MC02g04041	AUTOSOME	upregulated	no positive selection	ENOG410934C	Rhodanese-like_domain
MvSl-1064-A1-R4_MC02g04051	AUTOSOME	upregulated	no positive selection	ENOG410911R	Aminotransferase_class-V
MvSl-1064-A1-R4_MC02g04057	AUTOSOME	upregulated	no positive selection	ENOG41091VU	AAA_domain_(Cdc48_subfamily)
MvSl-1064-A1-R4_MC02g04060	AUTOSOME	upregulated	no positive selection	ENOG41091HV	Heat_shock_protein
MvSl-1064-A1-R4_MC02g04069	AUTOSOME	upregulated	no positive selection	ENOG41093S4	Component_of_the_ubiquinol-cytochrome_c_reductase_complex_(complex_III_or_cytochrome_b-c1_complex),_which_is_part_of_the_mitochondrial_respiratory_chain_(By_similarity)
MvSl-1064-A1-R4_MC02g04070	AUTOSOME	upregulated	no positive selection	ENOG41092Q4	CHORD
MvSl-1064-A1-R4_MC02g04076	AUTOSOME	upregulated	no positive selection	ENOG410936F	2Fe-2S_iron-sulfur_cluster_binding_domain
MvSl-1064-A1-R4_MC02g04086	AUTOSOME	upregulated	no positive selection	ENOG41092CU	LETM1-like_protein
MvSl-1064-A1-R4_MC02g04100	AUTOSOME	upregulated	no positive selection	ENOG41093CA	FR47-like_protein
MvSl-1064-A1-R4_MC02g04101	AUTOSOME	upregulated	no positive selection	ENOG41096QC	NA
MvSl-1064-A1-R4_MC02g04116	AUTOSOME	upregulated	no positive selection	ENOG41092CE	Class-II_DAHP_synthetase_family
MvSl-1064-A1-R4_MC02g04126	AUTOSOME	upregulated	no positive selection	ENOG41092XU	Nucleoside_diphosphate_kinase
MvSl-1064-A1-R4_MC02g04129	AUTOSOME	upregulated	no positive selection	ENOG410925T	60S_ribosomal_protein_L16
MvSl-1064-A1-R4_MC02g04131	AUTOSOME	upregulated	no positive selection	ENOG41093CU	DnaJ
MvSl-1064-A1-R4_MC02g04155	AUTOSOME	upregulated	no positive selection	ENOG41095HY	NA
MvSl-1064-A1-R4_MC02g04157	AUTOSOME	upregulated	no positive selection	ENOG41094I8	NA
MvSl-1064-A1-R4_MC02g04158	AUTOSOME	upregulated	no positive selection	ENOG41093H6	Cytochrome_b5-like_Heme/Steroid_binding_domain
MvSl-1064-A1-R4_MC02g04165	AUTOSOME	upregulated	no positive selection	NA	NA
MvSl-1064-A1-R4_MC02g04166	AUTOSOME	upregulated	no positive selection	ENOG410927X	T-complex_protein_1_subunit_delta
MvSl-1064-A1-R4_MC02g04167	AUTOSOME	upregulated	no positive selection	ENOG41093P3	Nuclear_transport_factor_2_(NTF2)_domain
MvSl-1064-A1-R4_MC02g04176	AUTOSOME	upregulated	no positive selection	ENOG4109215	ZnF_C2H2
MvSl-1064-A1-R4_MC02g04178	AUTOSOME	upregulated	no positive selection	ENOG41099D9	Cytidine_and_deoxycytidylate_deaminase_zinc-binding_region
MvSl-1064-A1-R4_MC02g04210	AUTOSOME	upregulated	no positive selection	ENOG41093P4	Inherit_from_fuNOG:_GAF_domain_nucleotide-binding_protein
MvSl-1064-A1-R4_MC03g04287	AUTOSOME	upregulated	no positive selection	NA	NA
MvSl-1064-A1-R4_MC03g04291	AUTOSOME	upregulated	no positive selection	ENOG41091F6	Shk1_kinase-binding_protein_1
MvSl-1064-A1-R4_MC03g04295	AUTOSOME	upregulated	no positive selection	ENOG410927H	MreB/Mbl_protein
MvSl-1064-A1-R4_MC03g04302	AUTOSOME	upregulated	no positive selection	ENOG41092ID	phosphatidylinositol_glycan,_class_A
MvSl-1064-A1-R4_MC03g04305	AUTOSOME	upregulated	no positive selection	ENOG41092JY	Histidine_biosynthesis_protein
MvSl-1064-A1-R4_MC03g04313	AUTOSOME	upregulated	no positive selection	ENOG4109291	Aamy
MvSl-1064-A1-R4_MC03g04317	AUTOSOME	upregulated	no positive selection	ENOG41094DD	ATP_synthase_E_chain
MvSl-1064-A1-R4_MC03g04355	AUTOSOME	upregulated	no positive selection	ENOG410915M	Anticodon_binding_domain
MvSl-1064-A1-R4_MC03g04356	AUTOSOME	upregulated	no positive selection	ENOG410923N	Cellulase_(glycosyl_hydrolase_family_5)
MvSl-1064-A1-R4_MC03g04358	AUTOSOME	upregulated	no positive selection	ENOG41095F9	Inherit_from_fuNOG:_conserved_hypothetical_protein
MvSl-1064-A1-R4_MC03g04361	AUTOSOME	upregulated	no positive selection	NA	NA
MvSl-1064-A1-R4_MC03g04363	AUTOSOME	upregulated	no positive selection	ENOG41093FS	PWI_domain
MvSl-1064-A1-R4_MC03g04367	AUTOSOME	upregulated	no positive selection	NA	NA
MvSl-1064-A1-R4_MC03g04380	AUTOSOME	upregulated	no positive selection	ENOG410926K	ZnF_C3H1
MvSl-1064-A1-R4_MC03g04381	AUTOSOME	upregulated	no positive selection	ENOG41092HP	Dihydrouridine_synthase_(Dus)
MvSl-1064-A1-R4_MC03g04383	AUTOSOME	upregulated	no positive selection	ENOG41092FR	Pyridine_nucleotide-disulphide_oxidoreductase
MvSl-1064-A1-R4_MC03g04399	AUTOSOME	upregulated	no positive selection	ENOG41092DA	26S_proteasome_regulatory_subunit
MvSl-1064-A1-R4_MC03g04400	AUTOSOME	upregulated	no positive selection	ENOG410930E	Histone_H2A
MvSl-1064-A1-R4_MC03g04407	AUTOSOME	upregulated	no positive selection	ENOG41091XZ	receptor_signaling_protein_serine/threonine_kinase_activity
MvSl-1064-A1-R4_MC03g04410	AUTOSOME	upregulated	no positive selection	ENOG41091IS	HELICc2
MvSl-1064-A1-R4_MC03g04412	AUTOSOME	upregulated	no positive selection	ENOG410932Q	Snf7
MvSl-1064-A1-R4_MC03g04414	AUTOSOME	upregulated	no positive selection	ENOG41093Y7	Inherit_from_fuNOG:_DNA-directed_RNA_polymerase_I_and_III
MvSl-1064-A1-R4_MC03g04438	AUTOSOME	upregulated	no positive selection	ENOG41093AG	WD_domain,_G-beta_repeat
MvSl-1064-A1-R4_MC03g04439	AUTOSOME	upregulated	no positive selection	ENOG410987N	DNA_polymerase_subunit_Cdc27
MvSl-1064-A1-R4_MC03g04449	AUTOSOME	upregulated	no positive selection	ENOG41091HH	Structural_maintenance_of_chromosomes_protein
MvSl-1064-A1-R4_MC03g04450	AUTOSOME	upregulated	no positive selection	NA	NA
MvSl-1064-A1-R4_MC03g04457	AUTOSOME	upregulated	no positive selection	ENOG410926P	DNA_repair_protein_RAD51
MvSl-1064-A1-R4_MC03g04461	AUTOSOME	upregulated	no positive selection	ENOG41094BK	DASH_complex_subunit_Ask1
MvSl-1064-A1-R4_MC03g04465	AUTOSOME	upregulated	no positive selection	ENOG41095DY	DUF1713
MvSl-1064-A1-R4_MC03g04471	AUTOSOME	upregulated	no positive selection	ENOG4109333	60s_ribosomal_protein_l17
MvSl-1064-A1-R4_MC03g04494	AUTOSOME	upregulated	no positive selection	ENOG41092K2	t-complex_protein_1
MvSl-1064-A1-R4_MC03g04499	AUTOSOME	upregulated	no positive selection	ENOG41091TY	inorganic
MvSl-1064-A1-R4_MC03g04500	AUTOSOME	upregulated	no positive selection	ENOG41093N8	Inherit_from_fuNOG:_Zn-dependent_hydrolase_oxidoreductase_family_protein
MvSl-1064-A1-R4_MC03g04505	AUTOSOME	upregulated	no positive selection	ENOG41093RU	Pfam:UPF0041
MvSl-1064-A1-R4_MC03g04506	AUTOSOME	upregulated	no positive selection	ENOG410991R	NA
MvSl-1064-A1-R4_MC03g04507	AUTOSOME	upregulated	no positive selection	ENOG410945P	Ubiquinol-cytochrome_C_reductase_hinge_protein
MvSl-1064-A1-R4_MC03g04513	AUTOSOME	upregulated	no positive selection	ENOG41099CN	Homocysteine_S-methyltransferase
MvSl-1064-A1-R4_MC03g04522	AUTOSOME	upregulated	no positive selection	ENOG41091BW	Dip2/Utp12_Family
MvSl-1064-A1-R4_MC03g04526	AUTOSOME	upregulated	no positive selection	NA	NA
MvSl-1064-A1-R4_MC03g04528	AUTOSOME	upregulated	no positive selection	ENOG410925Q	TGS_domain
MvSl-1064-A1-R4_MC03g04541	AUTOSOME	upregulated	no positive selection	ENOG410948N	HSCB_C-terminal_oligomerisation_domain
MvSl-1064-A1-R4_MC03g04542	AUTOSOME	upregulated	no positive selection	ENOG41094CS	Required_for_insertion_of_FAD_cofactor_into_SDH1,_the_catalytic_subunit_of_succinate_dehydrogenase_(SDH)._SDH_is_involved_in_complex_II_of_the_mitochondrial_electron_transport_chain_and_is_responsible_for_transferring_electrons_from_succinate_to_ubiquinone_(coenzyme_Q)._In_is_unclear_whether_it_participates_in_the_chemistry_of_FAD_attachment_(enzymatic_function)_or_acts_as_a_chaperone_that_mainta…
MvSl-1064-A1-R4_MC03g04543	AUTOSOME	upregulated	no positive selection	ENOG410933G	60S_ribosomal_protein_L28
MvSl-1064-A1-R4_MC03g04545	AUTOSOME	upregulated	no positive selection	ENOG41094N5	NADH_ubiquinone_oxidoreductase_subunit_NDUFA12
MvSl-1064-A1-R4_MC03g04552	AUTOSOME	upregulated	no positive selection	ENOG41092J6	Cytosol_aminopeptidase_family,_catalytic_domain
MvSl-1064-A1-R4_MC03g04554	AUTOSOME	upregulated	no positive selection	ENOG41092JM	Ras_association_(RalGDS/AF-6)_domain
MvSl-1064-A1-R4_MC03g04558	AUTOSOME	upregulated	no positive selection	ENOG41091X3	Component_of_the_coat_protein_complex_II_(COPII)_which_promotes_the_formation_of_transport_vesicles_from_the_endoplasmic_reticulum_(ER)._The_coat_has_two_main_functions,_the_physical_deformation_of_the_endoplasmic_reticulum_membrane_into_vesicles_and_the_selection_of_cargo_molecules_(By_similarity)
MvSl-1064-A1-R4_MC03g04571	AUTOSOME	upregulated	no positive selection	ENOG410926H	tRNA_synthetases_class_II_(D,_K_and_N)
MvSl-1064-A1-R4_MC03g04572	AUTOSOME	upregulated	no positive selection	ENOG4109177	ubiquitin-conjugating_enzyme
MvSl-1064-A1-R4_MC03g04573	AUTOSOME	upregulated	no positive selection	ENOG41093XR	NA
MvSl-1064-A1-R4_MC03g04606	AUTOSOME	upregulated	no positive selection	ENOG41092A6	Pfam:DUF1605
MvSl-1064-A1-R4_MC03g04610	AUTOSOME	upregulated	no positive selection	ENOG4109221	carrier_protein
MvSl-1064-A1-R4_MC03g04620	AUTOSOME	upregulated	no positive selection	ENOG410996X	Functions_as_a_nucleotide_exchange_factor_(NEF)_for_Hsp70_chaperones_which_accelerates_the_release_of_ADP._Required_for_fully_efficient_Hsp70-mediated_folding_of_proteins_(By_similarity)
MvSl-1064-A1-R4_MC03g04622	AUTOSOME	upregulated	no positive selection	ENOG41095FH	NA
MvSl-1064-A1-R4_MC03g04626	AUTOSOME	upregulated	no positive selection	ENOG41095GU	DJ-1/PfpI_family
MvSl-1064-A1-R4_MC03g04630	AUTOSOME	upregulated	no positive selection	ENOG41093U5	Thioredoxin
MvSl-1064-A1-R4_MC03g04633	AUTOSOME	upregulated	no positive selection	ENOG410951F	Class_II_histone_deacetylase_complex_subunits_2_and_3
MvSl-1064-A1-R4_MC03g04635	AUTOSOME	upregulated	no positive selection	ENOG4109717	NA
MvSl-1064-A1-R4_MC03g04642	AUTOSOME	upregulated	no positive selection	ENOG410910B	Amino_acid_transporter
MvSl-1064-A1-R4_MC03g04643	AUTOSOME	upregulated	no positive selection	ENOG41091FE	proline_iminopeptidase
MvSl-1064-A1-R4_MC03g04644	AUTOSOME	upregulated	no positive selection	ENOG410939C	Ribosomal_protein_L18e/L15
MvSl-1064-A1-R4_MC03g04645	AUTOSOME	upregulated	no positive selection	ENOG41094DH	Inherit_from_euNOG:_Conserved_hypothetical_protein
MvSl-1064-A1-R4_MC03g04649	AUTOSOME	upregulated	no positive selection	ENOG41092GZ	The_coatomer_is_a_cytosolic_protein_complex_that_binds_to_dilysine_motifs_and_reversibly_associates_with_Golgi_non-_clathrin-coated_vesicles,_which_further_mediate_biosynthetic_protein_transport_from_the_ER,_via_the_Golgi_up_to_the_trans_Golgi_network._Coatomer_complex_is_required_for_budding_from_Golgi_membranes,_and_is_essential_for_the_retrograde_Golgi-to-ER_transport_of_dilysine-tagged_protei…
MvSl-1064-A1-R4_MC03g04655	AUTOSOME	upregulated	no positive selection	ENOG41091DQ	adenylosuccinate_lyase
MvSl-1064-A1-R4_MC03g04661	AUTOSOME	upregulated	no positive selection	ENOG41091KG	Type-I_myosin_implicated_in_the_organization_of_the_actin_cytoskeleton._Required_for_proper_actin_cytoskeleton_polarization._At_the_cell_cortex,_assembles_in_patch-like_structures_together_with_proteins_from_the_actin-polymerizing_machinery_and_promotes_actin_assembly._Functions_as_actin_nucleation-promoting_factor_(NPF)_for_the_Arp2_3_complex_(By_similarity)
MvSl-1064-A1-R4_MC03g04668	AUTOSOME	upregulated	no positive selection	ENOG41092G8	Involved_in_the_first_step_of_pre-mRNA_splicing._Required_for_cell_growth_and_cell_cycle_control._Plays_a_role_in_the_levels_of_the_U1,_U4,_U5_and_U6_snRNAs_and_the_maintenance_of_the_U4_U6_snRNA_complex._May_provide_the_link_between_the_nineteen_complex_NTC_spliceosome_protein_complex_and_the_spliceosome_through_the_U6_snRNA._Associates_predominantly_with_U6_snRNAs_in_assembled_active_spliceosom…
MvSl-1064-A1-R4_MC03g04669	AUTOSOME	upregulated	no positive selection	ENOG410946C	NADH-ubiquinone_oxidoreductase_ASHI_subunit_(CI-ASHI_or_NDUFB8)
MvSl-1064-A1-R4_MC03g04675	AUTOSOME	upregulated	no positive selection	NA	NA
MvSl-1064-A1-R4_MC03g04679	AUTOSOME	upregulated	no positive selection	ENOG41099CI	cAMP-dependent_protein_kinase
MvSl-1064-A1-R4_MC03g04705	AUTOSOME	upregulated	no positive selection	ENOG41094AH	Nuclear_pore_RNA_shuttling_protein_Mtr2
MvSl-1064-A1-R4_MC03g04709	AUTOSOME	upregulated	no positive selection	ENOG410941J	Nucleolar_RNA-binding_protein,_Nop10p_family
MvSl-1064-A1-R4_MC03g04750	AUTOSOME	upregulated	no positive selection	ENOG41091TD	K00850_6-phosphofructokinase_1_EC_2.7.1.11
MvSl-1064-A1-R4_MC03g04754	AUTOSOME	upregulated	no positive selection	ENOG41093PF	60s_ribosomal_protein
MvSl-1064-A1-R4_MC03g04761	AUTOSOME	upregulated	no positive selection	ENOG41093JC	iron_permease
MvSl-1064-A1-R4_MC03g04764	AUTOSOME	upregulated	no positive selection	ENOG4109491	Acts_as_a_component_of_the_essential_kinetochore-_associated_NDC80_complex,_which_is_required_for_chromosome_segregation_and_spindle_checkpoint_activity_(By_similarity)
MvSl-1064-A1-R4_MC03g04772	AUTOSOME	upregulated	no positive selection	ENOG4109702	NA
MvSl-1064-A1-R4_MC03g04776	AUTOSOME	upregulated	no positive selection	ENOG41093IV	LIM_domain
MvSl-1064-A1-R4_MC03g04784	AUTOSOME	upregulated	no positive selection	ENOG41097Y3	NA
MvSl-1064-A1-R4_MC03g04787	AUTOSOME	upregulated	no positive selection	ENOG41092IY	Phosphoglycerate_kinase
MvSl-1064-A1-R4_MC03g04789	AUTOSOME	upregulated	no positive selection	ENOG4109547	Indoleamine_2,3-dioxygenase
MvSl-1064-A1-R4_MC03g04794	AUTOSOME	upregulated	no positive selection	ENOG410945N	UcrQ_family
MvSl-1064-A1-R4_MC03g04803	AUTOSOME	upregulated	no positive selection	NA	NA
MvSl-1064-A1-R4_MC03g04813	AUTOSOME	upregulated	no positive selection	ENOG410942C	Spt20_family
MvSl-1064-A1-R4_MC03g04820	AUTOSOME	upregulated	no positive selection	ENOG410912Z	haloacid_dehalogenase-like_hydrolase
MvSl-1064-A1-R4_MC03g04821	AUTOSOME	upregulated	no positive selection	ENOG41091H6	Sugar_(and_other)_transporter
MvSl-1064-A1-R4_MC03g04846	AUTOSOME	upregulated	no positive selection	ENOG410953V	NA
MvSl-1064-A1-R4_MC03g04849	AUTOSOME	upregulated	no positive selection	NA	NA
MvSl-1064-A1-R4_MC03g04850	AUTOSOME	upregulated	no positive selection	ENOG4109182	Protein_tyrosine_kinase
MvSl-1064-A1-R4_MC03g04851	AUTOSOME	upregulated	no positive selection	ENOG41092H4	Hsp70_protein
MvSl-1064-A1-R4_MC03g04854	AUTOSOME	upregulated	no positive selection	ENOG41091TQ	Proteasome_regulatory_subunit_C-terminal
MvSl-1064-A1-R4_MC03g04855	AUTOSOME	upregulated	no positive selection	ENOG41094ED	Oligosaccharyltransferase_subunit_Ribophorin_II
MvSl-1064-A1-R4_MC03g04894	AUTOSOME	upregulated	no positive selection	ENOG410930E	Histone_H2A
MvSl-1064-A1-R4_MC03g04917	AUTOSOME	upregulated	no positive selection	ENOG41093EC	ERCC4
MvSl-1064-A1-R4_MC03g04926	AUTOSOME	upregulated	no positive selection	ENOG4109400	NA
MvSl-1064-A1-R4_MC03g04927	AUTOSOME	upregulated	no positive selection	ENOG410928F	Orotidine_5'-phosphate_decarboxylase
MvSl-1064-A1-R4_MC03g04971	AUTOSOME	upregulated	no positive selection	ENOG41092PI	Methyltransferase_domain
MvSl-1064-A1-R4_MC03g04973	AUTOSOME	upregulated	no positive selection	ENOG4109300	PH
MvSl-1064-A1-R4_MC03g04974	AUTOSOME	upregulated	no positive selection	ENOG41091EC	DNA_primase
MvSl-1064-A1-R4_MC03g04983	AUTOSOME	upregulated	no positive selection	ENOG41092P9	Translocation_protein_Sec62
MvSl-1064-A1-R4_MC03g04984	AUTOSOME	upregulated	no positive selection	ENOG41091N1	Regulatory_subunit_of_the_condensin_complex,_a_complex_required_for_conversion_of_interphase_chromatin_into_mitotic-like_condense_chromosomes._The_condensin_complex_probably_introduces_positive_supercoils_into_relaxed_DNA_in_the_presence_of_type_I_topoisomerases_and_converts_nicked_DNA_into_positive_knotted_forms_in_the_presence_of_type_II_topoisomerases_(By_similarity)
MvSl-1064-A1-R4_MC03g04986	AUTOSOME	upregulated	no positive selection	ENOG4109182	Protein_tyrosine_kinase
MvSl-1064-A1-R4_MC03g05007	AUTOSOME	upregulated	no positive selection	ENOG41094I0	NA
MvSl-1064-A1-R4_MC03g05008	AUTOSOME	upregulated	no positive selection	ENOG41094CZ	Neugrin
MvSl-1064-A1-R4_MC03g05009	AUTOSOME	upregulated	no positive selection	ENOG41092TM	Constituent_of_COPII-coated_endoplasmic_reticulum-_derived_transport_vesicles._Required_for_efficient_transport_of_a_subset_of_secretory_proteins_to_the_Golgi._Facilitates_retrograde_transport_from_the_Golgi_to_the_endoplasmic_reticulum_(By_similarity)
MvSl-1064-A1-R4_MC03g05024	AUTOSOME	upregulated	no positive selection	ENOG41094KZ	4F5_protein_family
MvSl-1064-A1-R4_MC03g05029	AUTOSOME	upregulated	no positive selection	ENOG41094FP	HMG_(high_mobility_group)_box
MvSl-1064-A1-R4_MC03g05030	AUTOSOME	upregulated	no positive selection	ENOG41091YF	Heat_shock_protein
MvSl-1064-A1-R4_MC03g05044	AUTOSOME	upregulated	no positive selection	ENOG4109736	NA
MvSl-1064-A1-R4_MC03g05051	AUTOSOME	upregulated	no positive selection	ENOG410941S	Inherit_from_KOG:_coiled-coil-helix-coiled-coil-helix_domain_containing
MvSl-1064-A1-R4_MC03g05054	AUTOSOME	upregulated	no positive selection	ENOG4109157	tRNA_synthetases_class_I_(C)_catalytic_domain
MvSl-1064-A1-R4_MC03g05057	AUTOSOME	upregulated	no positive selection	ENOG410918Y	Catalyzes_the_formation_of_S-adenosylmethionine_from_methionine_and_ATP_(By_similarity)
MvSl-1064-A1-R4_MC03g05062	AUTOSOME	upregulated	no positive selection	ENOG4109438	RNA_polymerases_N_/_8_kDa_subunit
MvSl-1064-A1-R4_MC03g05101	AUTOSOME	upregulated	no positive selection	ENOG41094CE	Pericentrin-AKAP-450_domain_of_centrosomal_targeting_protein
MvSl-1064-A1-R4_MC03g05138	AUTOSOME	upregulated	no positive selection	ENOG41092GV	Malic_enzyme
MvSl-1064-A1-R4_MC03g05143	AUTOSOME	upregulated	no positive selection	ENOG41094IQ	NA
MvSl-1064-A1-R4_MC03g05144	AUTOSOME	upregulated	no positive selection	ENOG410921U	TENA/THI-4/PQQC_family
MvSl-1064-A1-R4_MC03g05147	AUTOSOME	upregulated	no positive selection	ENOG410933T	Phospholipid_methyltransferase
MvSl-1064-A1-R4_MC03g05156	AUTOSOME	upregulated	no positive selection	ENOG41093SF	GINS_complex_protein
MvSl-1064-A1-R4_MC03g05157	AUTOSOME	upregulated	no positive selection	ENOG41094QZ	Ctf8
MvSl-1064-A1-R4_MC03g05161	AUTOSOME	upregulated	no positive selection	ENOG41091MR	40S_ribosomal_protein_S7
MvSl-1064-A1-R4_MC03g05169	AUTOSOME	upregulated	no positive selection	ENOG41093IA	Inherit_from_fuNOG:_RNA-binding_nucleolar_protein_required_for_pre-rRNA_processing._Involved_in_production_of_18S_rRNA_and_assembly_of_small_ribosomal_subunit_(By_similarity)
MvSl-1064-A1-R4_MC03g05173	AUTOSOME	upregulated	no positive selection	ENOG410972B	Acetyltransferase_(GNAT)_family
MvSl-1064-A1-R4_MC03g05218	AUTOSOME	upregulated	no positive selection	ENOG41092BE	Mak16_protein_C-terminal_region
MvSl-1064-A1-R4_MC03g05234	AUTOSOME	upregulated	no positive selection	ENOG410943R	Double-stranded_DNA-binding_domain
MvSl-1064-A1-R4_MC03g05237	AUTOSOME	upregulated	no positive selection	ENOG41093HT	NA
MvSl-1064-A1-R4_MC03g05240	AUTOSOME	upregulated	no positive selection	NA	NA
MvSl-1064-A1-R4_MC03g05246	AUTOSOME	upregulated	no positive selection	ENOG41094J5	HCNGP-like_protein
MvSl-1064-A1-R4_MC03g05252	AUTOSOME	upregulated	no positive selection	ENOG410928K	Sterol_24-C-methyltransferase
MvSl-1064-A1-R4_MC03g05254	AUTOSOME	upregulated	no positive selection	ENOG41092N9	Putative_tRNA_binding_domain
MvSl-1064-A1-R4_MC04-1g05294	AUTOSOME	upregulated	no positive selection	ENOG410943K	Prefoldin_subunit
MvSl-1064-A1-R4_MC04-1g05295	AUTOSOME	upregulated	no positive selection	ENOG41091ZR	fatty_acid_desaturase
MvSl-1064-A1-R4_MC04-1g05298	AUTOSOME	upregulated	no positive selection	ENOG41092VW	alternative_oxidase
MvSl-1064-A1-R4_MC04-1g05305	AUTOSOME	upregulated	no positive selection	ENOG41092U2	Component_of_the_eukaryotic_translation_initiation_factor_3_(eIF-3)_complex,_which_is_involved_in_protein_synthesis_and,_together_with_other_initiation_factors,_stimulates_binding_of_mRNA_and_methionyl-tRNAi_to_the_40S_ribosome_(By_similarity)
MvSl-1064-A1-R4_MC04-1g05306	AUTOSOME	upregulated	no positive selection	ENOG41092VA	Component_of_the_eukaryotic_translation_initiation_factor_3_(eIF-3)_complex,_which_is_involved_in_protein_synthesis_and,_together_with_other_initiation_factors,_stimulates_binding_of_mRNA_and_methionyl-tRNAi_to_the_40S_ribosome_(By_similarity)
MvSl-1064-A1-R4_MC04-1g05308	AUTOSOME	upregulated	no positive selection	ENOG41095SU	NA
MvSl-1064-A1-R4_MC04-1g05325	AUTOSOME	upregulated	no positive selection	ENOG41094SM	Cell_division_control_protein_14,_SIN_component
MvSl-1064-A1-R4_MC04-1g05329	AUTOSOME	upregulated	no positive selection	ENOG41091B3	4Fe-4S_binding_domain
MvSl-1064-A1-R4_MC04-1g05330	AUTOSOME	upregulated	no positive selection	NA	NA
MvSl-1064-A1-R4_MC04-1g05333	AUTOSOME	upregulated	no positive selection	ENOG410932P	Dip2/Utp12_Family
MvSl-1064-A1-R4_MC04-1g05336	AUTOSOME	upregulated	no positive selection	ENOG410949S	R,R-butanediol_dehydrogenase
MvSl-1064-A1-R4_MC04-1g05345	AUTOSOME	upregulated	no positive selection	NA	NA
MvSl-1064-A1-R4_MC04-1g05351	AUTOSOME	upregulated	no positive selection	ENOG41094JY	NA
MvSl-1064-A1-R4_MC04-1g05366	AUTOSOME	upregulated	no positive selection	ENOG410945F	Caffeine-induced_death_protein_2
MvSl-1064-A1-R4_MC04-1g05368	AUTOSOME	upregulated	no positive selection	ENOG41094P3	Inherit_from_fuNOG:_mitochondrial_hypoxia_responsive_domain_protein
MvSl-1064-A1-R4_MC04-1g05369	AUTOSOME	upregulated	no positive selection	ENOG4109247	ATP-binding_RNA_helicase_involved_in_40S_ribosomal_subunit_biogenesis_and_is_required_for_the_normal_formation_of_18S_rRNAs_through_pre-rRNA_processing_at_A0,_A1_and_A2_sites._Required_for_vegetative_growth_(By_similarity)
MvSl-1064-A1-R4_MC04-1g05438	AUTOSOME	upregulated	no positive selection	ENOG41091IF	T-complex_protein_1_subunit_alpha
MvSl-1064-A1-R4_MC04-1g05452	AUTOSOME	upregulated	no positive selection	ENOG41090ZA	Vacuole_protein
MvSl-1064-A1-R4_MC04-1g05455	AUTOSOME	upregulated	no positive selection	ENOG41092SV	Indoleamine_2,3-dioxygenase
MvSl-1064-A1-R4_MC04-1g05459	AUTOSOME	upregulated	no positive selection	ENOG41094AF	Eukaryotic_protein_of_unknown_function_(DUF866)
MvSl-1064-A1-R4_MC04-1g05471	AUTOSOME	upregulated	no positive selection	ENOG41095XB	NA
MvSl-1064-A1-R4_MC04-1g05480	AUTOSOME	upregulated	no positive selection	ENOG4109322	40S_ribosomal_protein_S12
MvSl-1064-A1-R4_MC04-1g05498	AUTOSOME	upregulated	no positive selection	NA	NA
MvSl-1064-A1-R4_MC04-1g05529	AUTOSOME	upregulated	no positive selection	ENOG4109139	PB1_domain
MvSl-1064-A1-R4_MC04-1g05549	AUTOSOME	upregulated	no positive selection	ENOG41093QG	Ribosomal_protein_S13/S18
MvSl-1064-A1-R4_MC04-1g05550	AUTOSOME	upregulated	no positive selection	ENOG41093UZ	Sas10/Utp3/C1D_family
MvSl-1064-A1-R4_MC04-1g05551	AUTOSOME	upregulated	no positive selection	ENOG4109510	Eukaryotic_aspartyl_protease
MvSl-1064-A1-R4_MC04-1g05565	AUTOSOME	upregulated	no positive selection	ENOG4109397	Inherit_from_fuNOG:_conserved_hypothetical_protein
MvSl-1064-A1-R4_MC04-1g05569	AUTOSOME	upregulated	no positive selection	ENOG41092Q7	Mitochondrial_carrier_protein
MvSl-1064-A1-R4_MC04-1g05570	AUTOSOME	upregulated	no positive selection	ENOG41091SF	Topoisomerase_I
MvSl-1064-A1-R4_MC04-1g05575	AUTOSOME	upregulated	no positive selection	NA	NA
MvSl-1064-A1-R4_MC04-1g05579	AUTOSOME	upregulated	no positive selection	ENOG4109319	HMG_(high_mobility_group)_box
MvSl-1064-A1-R4_MC04-1g05583	AUTOSOME	upregulated	no positive selection	ENOG4109590	Rare_lipoprotein_A_(RlpA)-like_double-psi_beta-barrel
MvSl-1064-A1-R4_MC04-1g05584	AUTOSOME	upregulated	no positive selection	ENOG41093A1	Inherit_from_fuNOG:_U2_small_nuclear_ribonucleoprotein_A
MvSl-1064-A1-R4_MC04-1g05601	AUTOSOME	upregulated	no positive selection	ENOG41091A2	Isocitrate_dehydrogenase
MvSl-1064-A1-R4_MC04-1g05602	AUTOSOME	upregulated	no positive selection	ENOG41091G1	Isocitrate/isopropylmalate_dehydrogenase
MvSl-1064-A1-R4_MC04-1g05603	AUTOSOME	upregulated	no positive selection	ENOG41093I8	CADG
MvSl-1064-A1-R4_MC04-1g05608	AUTOSOME	upregulated	no positive selection	ENOG410910W	VIT_family
MvSl-1064-A1-R4_MC04-1g05610	AUTOSOME	upregulated	no positive selection	ENOG41094HY	Sin3_associated_polypeptide_p18_(SAP18)
MvSl-1064-A1-R4_MC04-1g05618	AUTOSOME	upregulated	no positive selection	ENOG4109373	chitin_deacetylase
MvSl-1064-A1-R4_MC04-1g05627	AUTOSOME	upregulated	no positive selection	ENOG41095IN	NA
MvSl-1064-A1-R4_MC04-1g05629	AUTOSOME	upregulated	no positive selection	ENOG410951T	malic_enzyme
MvSl-1064-A1-R4_MC04-1g05633	AUTOSOME	upregulated	no positive selection	ENOG41090Z0	Translation_initiation_factor
MvSl-1064-A1-R4_MC04-1g05637	AUTOSOME	upregulated	no positive selection	ENOG410925G	DNA_repair_protein_rad8
MvSl-1064-A1-R4_MC04-1g05638	AUTOSOME	upregulated	no positive selection	ENOG41091X5	Component_of_the_ubiquinol-cytochrome_c_reductase_complex_(complex_III_or_cytochrome_b-c1_complex),_which_is_a_respiratory_chain_that_generates_an_electrochemical_potential_coupled_to_ATP_synthesis_(By_similarity)
MvSl-1064-A1-R4_MC04-1g05641	AUTOSOME	upregulated	no positive selection	ENOG41099DD	Acetyltransferase_(GNAT)_family
MvSl-1064-A1-R4_MC04-1g05642	AUTOSOME	upregulated	no positive selection	ENOG41093YJ	Breast_carcinoma_amplified_sequence_2_(BCAS2)
MvSl-1064-A1-R4_MC04-1g05648	AUTOSOME	upregulated	no positive selection	ENOG410959V	HIT_domain
MvSl-1064-A1-R4_MC04-1g05661	AUTOSOME	upregulated	no positive selection	ENOG41091J9	Rhomboid_family
MvSl-1064-A1-R4_MC04-1g05670	AUTOSOME	upregulated	no positive selection	ENOG41092IE	SEC14_cytosolic_factor
MvSl-1064-A1-R4_MC04-1g05695	AUTOSOME	upregulated	no positive selection	ENOG41099AE	Thioredoxin
MvSl-1064-A1-R4_MC04-1g05697	AUTOSOME	upregulated	no positive selection	ENOG410926G	Major_Facilitator_Superfamily
MvSl-1064-A1-R4_MC04-1g05698	AUTOSOME	upregulated	no positive selection	ENOG41092IV	Phosphoadenosine_phosphosulfate_reductase_family
MvSl-1064-A1-R4_MC04-1g05699	AUTOSOME	upregulated	no positive selection	ENOG410917C	glutaryl-CoA_dehydrogenase
MvSl-1064-A1-R4_MC04-1g05700	AUTOSOME	upregulated	no positive selection	ENOG41092S0	Alcohol_dehydrogenase_GroES-like_domain
MvSl-1064-A1-R4_MC04-1g05702	AUTOSOME	upregulated	no positive selection	ENOG41091H3	Natural_resistance-associated_macrophage_protein
MvSl-1064-A1-R4_MC04-1g05716	AUTOSOME	upregulated	no positive selection	ENOG41091RI	Cytochrome_P450
MvSl-1064-A1-R4_MC04-1g05717	AUTOSOME	upregulated	no positive selection	ENOG410952X	Pfam:dsRNA_bind
MvSl-1064-A1-R4_MC04-1g05724	AUTOSOME	upregulated	no positive selection	ENOG41092XF	ARP2_3_complex_21_kDa_subunit
MvSl-1064-A1-R4_MC04-1g05725	AUTOSOME	upregulated	no positive selection	ENOG41099BW	Fungal_trichothecene_efflux_pump_(TRI12)
MvSl-1064-A1-R4_MC04-1g05740	AUTOSOME	upregulated	no positive selection	ENOG4109166	ATP-grasp_domain
MvSl-1064-A1-R4_MC04-1g05747	AUTOSOME	upregulated	no positive selection	ENOG410935U	Inherit_from_opiNOG:_NADH_dehydrogenase_(Ubiquinone)_1_alpha_subcomplex_8
MvSl-1064-A1-R4_MC04-1g05751	AUTOSOME	upregulated	no positive selection	ENOG4109266	CoA_binding
MvSl-1064-A1-R4_MC04-1g05759	AUTOSOME	upregulated	no positive selection	ENOG4109670	NA
MvSl-1064-A1-R4_MC04-1g05761	AUTOSOME	upregulated	no positive selection	ENOG410939D	Clathrin_light_chain
MvSl-1064-A1-R4_MC04-1g05763	AUTOSOME	upregulated	no positive selection	ENOG4109360	Aminotransferase_class-V
MvSl-1064-A1-R4_MC04-1g05768	AUTOSOME	upregulated	no positive selection	ENOG41090ZZ	ribosomal_protein
MvSl-1064-A1-R4_MC04-1g05769	AUTOSOME	upregulated	no positive selection	ENOG41091I4	Coatomer_WD_associated_region
MvSl-1064-A1-R4_MC04-1g05770	AUTOSOME	upregulated	no positive selection	ENOG4109108	Essential_component_of_the_TIM23_complex,_a_complex_that_mediates_the_translocation_of_transit_peptide-containing_proteins_across_the_mitochondrial_inner_membrane._Required_to_direct_preproteins_in_transit_and_direct_them_to_the_channel_protein_TIM23,_and_possibly_facilitates_transfer_of_the_translocating_proteins_from_the_TOM_complex_to_the_TIM23_complex_(By_similarity)
MvSl-1064-A1-R4_MC04-1g05780	AUTOSOME	upregulated	no positive selection	ENOG410942E	Inherit_from_euNOG:_Conserved_hypothetical_protein
MvSl-1064-A1-R4_MC04-1g05789	AUTOSOME	upregulated	no positive selection	ENOG41092UM	Inherit_from_fuNOG:_acyl-CoA_thioester_hydrolase
MvSl-1064-A1-R4_MC04-1g05794	AUTOSOME	upregulated	no positive selection	NA	NA
MvSl-1064-A1-R4_MC04-1g05795	AUTOSOME	upregulated	no positive selection	ENOG41096H5	NA
MvSl-1064-A1-R4_MC04-1g05801	AUTOSOME	upregulated	no positive selection	ENOG41094EI	Ctr_copper_transporter_family
MvSl-1064-A1-R4_MC04-1g05814	AUTOSOME	upregulated	no positive selection	ENOG41091IM	May_be_involved_in_specific_transport_of_UDP-Gal_from_the_cytosol_to_the_Golgi_lumen._Involved_in_the_maintenance_of_optimal_conditions_for_the_folding_of_secretory_pathway_proteins_in_the_endoplasmic_reticulum_(By_similarity)
MvSl-1064-A1-R4_MC04-1g05856	AUTOSOME	upregulated	no positive selection	ENOG41093PP	Ribosomal_protein_S15
MvSl-1064-A1-R4_MC04-1g05857	AUTOSOME	upregulated	no positive selection	ENOG41092NP	G10_protein
MvSl-1064-A1-R4_MC04-1g05860	AUTOSOME	upregulated	no positive selection	ENOG41093WD	JmjC
MvSl-1064-A1-R4_MC04-1g05861	AUTOSOME	upregulated	no positive selection	ENOG410933E	Inherit_from_fuNOG:_conserved_hypothetical_protein
MvSl-1064-A1-R4_MC04-1g05866	AUTOSOME	upregulated	no positive selection	ENOG41091HI	Pyruvate_dehydrogenase_e1_component_beta_subunit
MvSl-1064-A1-R4_MC04-1g05867	AUTOSOME	upregulated	no positive selection	ENOG41093Z1	Translin_family
MvSl-1064-A1-R4_MC04-1g05868	AUTOSOME	upregulated	no positive selection	ENOG4109471	Nitroreductase_family
MvSl-1064-A1-R4_MC04-1g05869	AUTOSOME	upregulated	no positive selection	ENOG41091RJ	Component_of_the_eukaryotic_translation_initiation_factor_3_(eIF-3)_complex,_which_is_involved_in_protein_synthesis_and,_together_with_other_initiation_factors,_stimulates_binding_of_mRNA_and_methionyl-tRNAi_to_the_40S_ribosome_(By_similarity)
MvSl-1064-A1-R4_MC04-1g05884	AUTOSOME	upregulated	no positive selection	ENOG41092N6	Ribosomal_protein_S11
MvSl-1064-A1-R4_MC04-1g05885	AUTOSOME	upregulated	no positive selection	ENOG41092QR	translationally-controlled_tumor_protein
MvSl-1064-A1-R4_MC04-1g05886	AUTOSOME	upregulated	no positive selection	ENOG4109217	ABC_transporter
MvSl-1064-A1-R4_MC04-1g05920	AUTOSOME	upregulated	no positive selection	ENOG4109453	Cytochrome_b5-like_Heme/Steroid_binding_domain
MvSl-1064-A1-R4_MC04-1g05924	AUTOSOME	upregulated	no positive selection	ENOG41092FC	DNAj_protein
MvSl-1064-A1-R4_MC04-1g05950	AUTOSOME	upregulated	no positive selection	ENOG410937T	ribosomal_protein
MvSl-1064-A1-R4_MC04-1g05961	AUTOSOME	upregulated	no positive selection	ENOG410924I	RAB
MvSl-1064-A1-R4_MC04-1g05964	AUTOSOME	upregulated	no positive selection	ENOG41092P0	NA
MvSl-1064-A1-R4_MC04-1g05972	AUTOSOME	upregulated	no positive selection	ENOG4109248	ubiquitin_carboxyl-terminal_hydrolase
MvSl-1064-A1-R4_MC04-1g05999	AUTOSOME	upregulated	no positive selection	ENOG41092W4	TruB_family_pseudouridylate_synthase_(N_terminal_domain)
MvSl-1064-A1-R4_MC04-1g06020	AUTOSOME	upregulated	no positive selection	ENOG4109469	NA
MvSl-1064-A1-R4_MC04-1g06031	AUTOSOME	upregulated	no positive selection	ENOG41090ZM	K14950_cation-transporting_ATPase_13A1_EC_3.6.3
MvSl-1064-A1-R4_MC04-1g06035	AUTOSOME	upregulated	no positive selection	ENOG41091PT	GTP-binding_nuclear_protein
MvSl-1064-A1-R4_MC04-1g06048	AUTOSOME	upregulated	no positive selection	ENOG41094V4	IBR
MvSl-1064-A1-R4_MC04-1g06052	AUTOSOME	upregulated	no positive selection	ENOG41094CE	Pericentrin-AKAP-450_domain_of_centrosomal_targeting_protein
MvSl-1064-A1-R4_MC04-2g06094	AUTOSOME	upregulated	no positive selection	ENOG410938S	Metallo-beta-lactamase_superfamily
MvSl-1064-A1-R4_MC04-2g06095	AUTOSOME	upregulated	no positive selection	ENOG4109329	SAC3/GANP/Nin1/mts3/eIF-3_p25_family
MvSl-1064-A1-R4_MC04-2g06096	AUTOSOME	upregulated	no positive selection	ENOG410925J	The_proteasome_is_a_multicatalytic_proteinase_complex_which_is_characterized_by_its_ability_to_cleave_peptides_with_Arg,_Phe,_Tyr,_Leu,_and_Glu_adjacent_to_the_leaving_group_at_neutral_or_slightly_basic_pH._The_proteasome_has_an_ATP-dependent_proteolytic_activity_(By_similarity)
MvSl-1064-A1-R4_MC04-2g06099	AUTOSOME	upregulated	no positive selection	ENOG410923Y	Catalyzes_the_hydroxylation_of_the_N(6)-(4-aminobutyl)-_L-lysine_intermediate_to_form_hypusine,_an_essential_post-_translational_modification_only_found_in_mature_eIF-5A_factor_(By_similarity)
MvSl-1064-A1-R4_MC05-1g06117	AUTOSOME	upregulated	no positive selection	ENOG41092DY	Inherit_from_fuNOG:_conserved_hypothetical_protein
MvSl-1064-A1-R4_MC05-1g06122	AUTOSOME	upregulated	no positive selection	ENOG41093SB	NA
MvSl-1064-A1-R4_MC05-1g06124	AUTOSOME	upregulated	no positive selection	ENOG41092VF	Peptidase_family_M48
MvSl-1064-A1-R4_MC05-1g06135	AUTOSOME	upregulated	no positive selection	ENOG41092YD	CS_domain
MvSl-1064-A1-R4_MC05-1g06153	AUTOSOME	upregulated	no positive selection	ENOG41093KT	Inherit_from_fuNOG:_37S_ribosomal_protein
MvSl-1064-A1-R4_MC05-1g06156	AUTOSOME	upregulated	no positive selection	ENOG41094KZ	4F5_protein_family
MvSl-1064-A1-R4_MC05-1g06158	AUTOSOME	upregulated	no positive selection	ENOG410926N	Protein_of_unknown_function_(DUF1604)
MvSl-1064-A1-R4_MC05-1g06161	AUTOSOME	upregulated	no positive selection	ENOG41095PX	RhoGAP
MvSl-1064-A1-R4_MC05-1g06170	AUTOSOME	upregulated	no positive selection	ENOG41091YR	protein_transport_protein_sec31
MvSl-1064-A1-R4_MC05-1g06197	AUTOSOME	upregulated	no positive selection	ENOG410956R	Alcohol_dehydrogenase_GroES-like_domain
MvSl-1064-A1-R4_MC05-1g06216	AUTOSOME	upregulated	no positive selection	ENOG410999J	Inherit_from_fuNOG:_conserved_hypothetical_protein
MvSl-1064-A1-R4_MC05-1g06220	AUTOSOME	upregulated	no positive selection	NA	NA
MvSl-1064-A1-R4_MC05-1g06236	AUTOSOME	upregulated	no positive selection	ENOG41093Z9	Inherit_from_fuNOG:_C2H2_finger_domain_protein
MvSl-1064-A1-R4_MC05-1g06239	AUTOSOME	upregulated	no positive selection	ENOG41093S8	60s_ribosomal_protein
MvSl-1064-A1-R4_MC05-1g06240	AUTOSOME	upregulated	no positive selection	ENOG41093SP	Zinc-finger_domain
MvSl-1064-A1-R4_MC05-1g06241	AUTOSOME	upregulated	no positive selection	ENOG410998N	RhoGAP
MvSl-1064-A1-R4_MC05-2g06321	AUTOSOME	upregulated	no positive selection	ENOG41094QP	Uncharacterised_conserved_protein_(DUF2315)
MvSl-1064-A1-R4_MC05-2g06356	AUTOSOME	upregulated	no positive selection	ENOG41093AA	pyruvate_dehydrogenase_protein_X_component,_mitochondrial_precursor
MvSl-1064-A1-R4_MC05-2g06360	AUTOSOME	upregulated	no positive selection	ENOG41091KK	60s_ribosomal_protein
MvSl-1064-A1-R4_MC05-2g06385	AUTOSOME	upregulated	no positive selection	ENOG41091P5	STI1
MvSl-1064-A1-R4_MC05-2g06387	AUTOSOME	upregulated	no positive selection	ENOG41093VE	Mitochondrial_carrier_protein
MvSl-1064-A1-R4_MC05-2g06392	AUTOSOME	upregulated	no positive selection	ENOG4109318	mitochondrial_54S_ribosomal_protein_YmL3
MvSl-1064-A1-R4_MC05-2g06399	AUTOSOME	upregulated	no positive selection	ENOG41091NI	Brix
MvSl-1064-A1-R4_MC05-2g06403	AUTOSOME	upregulated	no positive selection	ENOG41093Z2	ATP_adenylyltransferase
MvSl-1064-A1-R4_MC05-2g06406	AUTOSOME	upregulated	no positive selection	ENOG41093F6	Sm
MvSl-1064-A1-R4_MC05-2g06415	AUTOSOME	upregulated	no positive selection	ENOG41093UU	Zinc_knuckle
MvSl-1064-A1-R4_MC05-2g06416	AUTOSOME	upregulated	no positive selection	ENOG41092K4	HOOK_protein
MvSl-1064-A1-R4_MC05-2g06425	AUTOSOME	upregulated	no positive selection	ENOG410921H	ABC-2_type_transporter
MvSl-1064-A1-R4_MC05-2g06426	AUTOSOME	upregulated	no positive selection	ENOG41092P6	haloacid_dehalogenase-like_hydrolase
MvSl-1064-A1-R4_MC05-2g06474	AUTOSOME	upregulated	no positive selection	ENOG41094BT	Inherit_from_fuNOG:_pre-mRNA-splicing_factor_spp2
MvSl-1064-A1-R4_MC05-3g06511	AUTOSOME	upregulated	no positive selection	ENOG41093G2	CHY_zinc_finger
MvSl-1064-A1-R4_MC05-3g06515	AUTOSOME	upregulated	no positive selection	ENOG41091KM	plasma_membrane_H(
MvSl-1064-A1-R4_MC05-3g06517	AUTOSOME	upregulated	no positive selection	ENOG41094KR	Ubiquinol-cytochrome-c_reductase_complex_subunit_(QCR10)
MvSl-1064-A1-R4_MC05-3g06530	AUTOSOME	upregulated	no positive selection	ENOG41092YW	Formyl_transferase
MvSl-1064-A1-R4_MC05-3g06535	AUTOSOME	upregulated	no positive selection	ENOG410999N	WD_domain,_G-beta_repeat
MvSl-1064-A1-R4_MC05-3g06549	AUTOSOME	upregulated	no positive selection	NA	NA
MvSl-1064-A1-R4_MC05-3g06550	AUTOSOME	upregulated	no positive selection	ENOG41091RR	pyruvate_dehydrogenase_e1_component
MvSl-1064-A1-R4_MC05-3g06551	AUTOSOME	upregulated	no positive selection	ENOG41091RS	DNA/RNA_non-specific_endonuclease
MvSl-1064-A1-R4_MC05-3g06552	AUTOSOME	upregulated	no positive selection	ENOG41093F2	Cytochrome_c_oxidase_subunit_IV
MvSl-1064-A1-R4_MC05-3g06574	AUTOSOME	upregulated	no positive selection	ENOG41095NQ	Basic_region_leucine_zipper
MvSl-1064-A1-R4_MC05-3g06580	AUTOSOME	upregulated	no positive selection	ENOG41094SC	Mitochondrial_large_subunit_ribosomal_protein_(Img2)
MvSl-1064-A1-R4_MC05-3g06586	AUTOSOME	upregulated	no positive selection	ENOG41094FB	NA
MvSl-1064-A1-R4_MC05-3g06612	AUTOSOME	upregulated	no positive selection	ENOG41094DQ	Ribosome_recycling_factor
MvSl-1064-A1-R4_MC05-3g06619	AUTOSOME	upregulated	no positive selection	ENOG4109447	cwf18_pre-mRNA_splicing_factor
MvSl-1064-A1-R4_MC05-3g06622	AUTOSOME	upregulated	no positive selection	ENOG41091VD	Catalyzes_the_oxidative_decarboxylation_of_6-_phosphogluconate_to_ribulose_5-phosphate_and_CO(2),_with_concomitant_reduction_of_NADP_to_NADPH_(By_similarity)
MvSl-1064-A1-R4_MC05-3g06623	AUTOSOME	upregulated	no positive selection	ENOG4109326	TLC_domain
MvSl-1064-A1-R4_MC05-3g06625	AUTOSOME	upregulated	no positive selection	ENOG41093GK	RNA_recognition_motif._(a.k.a._RRM,_RBD,_or_RNP_domain)
MvSl-1064-A1-R4_MC05-3g06631	AUTOSOME	upregulated	no positive selection	ENOG41094GF	NA
MvSl-1064-A1-R4_MC05-3g06635	AUTOSOME	upregulated	no positive selection	ENOG41094QY	Mitochondrial_ribosomal_subunit_S27
MvSl-1064-A1-R4_MC05-3g06637	AUTOSOME	upregulated	no positive selection	ENOG41091YP	Glutamine_phosphoribosylpyrophosphate_amidotransferase
MvSl-1064-A1-R4_MC05-3g06639	AUTOSOME	upregulated	no positive selection	NA	NA
MvSl-1064-A1-R4_MC05-3g06651	AUTOSOME	upregulated	no positive selection	NA	NA
MvSl-1064-A1-R4_MC05-3g06661	AUTOSOME	upregulated	no positive selection	ENOG41092UA	mitochondrial_54S_ribosomal_protein_YmL9
MvSl-1064-A1-R4_MC05-3g06662	AUTOSOME	upregulated	no positive selection	ENOG41091KT	LRR
MvSl-1064-A1-R4_MC05-3g06663	AUTOSOME	upregulated	no positive selection	ENOG41094BY	Replication_Fork_Protection_Component_Swi3
MvSl-1064-A1-R4_MC05-3g06671	AUTOSOME	upregulated	no positive selection	ENOG4109150	Asparagine_synthetase
MvSl-1064-A1-R4_MC05-3g06680	AUTOSOME	upregulated	no positive selection	ENOG4109341	ATP_synthase_regulation_protein_NCA2
MvSl-1064-A1-R4_MC05-3g06684	AUTOSOME	upregulated	no positive selection	ENOG4109241	Formate--tetrahydrofolate_ligase
MvSl-1064-A1-R4_MC05-3g06687	AUTOSOME	upregulated	no positive selection	ENOG41090ZF	LeuA_dimer
MvSl-1064-A1-R4_MC05-3g06701	AUTOSOME	upregulated	no positive selection	ENOG41094KT	Tom37_C-terminal_domain
MvSl-1064-A1-R4_MC05-3g06702	AUTOSOME	upregulated	no positive selection	ENOG410924E	Replication_factor_C_C-terminal_domain
MvSl-1064-A1-R4_MC05-3g06703	AUTOSOME	upregulated	no positive selection	ENOG41093U4	Chromatin_assembly_factor_1_subunit_A
MvSl-1064-A1-R4_MC05-3g06723	AUTOSOME	upregulated	no positive selection	ENOG4109468	Homeobox_domain
MvSl-1064-A1-R4_MC05-3g06726	AUTOSOME	upregulated	no positive selection	ENOG410915Z	3'_exoribonuclease_family,_domain_2
MvSl-1064-A1-R4_MC05-3g06736	AUTOSOME	upregulated	no positive selection	ENOG41093TQ	40s_ribosomal_protein_s27
MvSl-1064-A1-R4_MC05-3g06737	AUTOSOME	upregulated	no positive selection	ENOG41092AI	fructose-bisphosphate_aldolase
MvSl-1064-A1-R4_MC05-3g06739	AUTOSOME	upregulated	no positive selection	ENOG410982R	Glycosyl_hydrolase_family_1
MvSl-1064-A1-R4_MC05-3g06758	AUTOSOME	upregulated	no positive selection	ENOG41093BE	CAP-Gly_domain
MvSl-1064-A1-R4_MC05-3g06762	AUTOSOME	upregulated	no positive selection	ENOG41093PH	Cyclin-dependent_kinase_regulatory_subunit
MvSl-1064-A1-R4_MC05-3g06763	AUTOSOME	upregulated	no positive selection	ENOG41095WZ	NA
MvSl-1064-A1-R4_MC05-3g06766	AUTOSOME	upregulated	no positive selection	NA	NA
MvSl-1064-A1-R4_MC05-3g06775	AUTOSOME	upregulated	no positive selection	ENOG41092F2	serine_threonine_kinase_receptor_associated_protein
MvSl-1064-A1-R4_MC05-3g06780	AUTOSOME	upregulated	no positive selection	ENOG41093PX	60S_ribosomal_protein_L22
MvSl-1064-A1-R4_MC05-3g06801	AUTOSOME	upregulated	no positive selection	ENOG41094YP	Calcineurin-like_phosphoesterase
MvSl-1064-A1-R4_MC05-3g06809	AUTOSOME	upregulated	no positive selection	ENOG4109347	Seems_to_be_required_for_maximal_rate_of_protein_biosynthesis._Enhances_ribosome_dissociation_into_subunits_and_stabilizes_the_binding_of_the_initiator_Met-tRNA(I)_to_40_S_ribosomal_subunits_(By_similarity)
MvSl-1064-A1-R4_MC05-3g06826	AUTOSOME	upregulated	no positive selection	ENOG4109971	STYKc
MvSl-1064-A1-R4_MC05-3g06828	AUTOSOME	upregulated	no positive selection	ENOG4109158	Triose-phosphate_isomerase
MvSl-1064-A1-R4_MC05-3g06829	AUTOSOME	upregulated	no positive selection	ENOG41093MA	Binds_to_actin_and_affects_the_structure_of_the_cytoskeleton._At_high_concentrations,_profilin_prevents_the_polymerization_of_actin,_whereas_it_enhances_it_at_low_concentrations_(By_similarity)
MvSl-1064-A1-R4_MC06g06886	AUTOSOME	upregulated	no positive selection	ENOG41092AU	Mitochondrial_inner_membrane_protein
MvSl-1064-A1-R4_MC06g06898	AUTOSOME	upregulated	no positive selection	ENOG41092C9	ribosomal_protein
MvSl-1064-A1-R4_MC06g06901	AUTOSOME	upregulated	no positive selection	ENOG410912W	RNB
MvSl-1064-A1-R4_MC06g06903	AUTOSOME	upregulated	no positive selection	ENOG41094BH	NA
MvSl-1064-A1-R4_MC06g06914	AUTOSOME	upregulated	no positive selection	ENOG41092F7	Inherit_from_fuNOG:_Importin_beta-5_subunit
MvSl-1064-A1-R4_MC06g06920	AUTOSOME	upregulated	no positive selection	ENOG41092RP	PPIases_accelerate_the_folding_of_proteins_(By_similarity)
MvSl-1064-A1-R4_MC06g06926	AUTOSOME	upregulated	no positive selection	ENOG41094KA	PPP4R2
MvSl-1064-A1-R4_MC06g06949	AUTOSOME	upregulated	no positive selection	ENOG410929J	NUDIX_domain
MvSl-1064-A1-R4_MC06g06952	AUTOSOME	upregulated	no positive selection	ENOG410928W	Argininosuccinate_lyase
MvSl-1064-A1-R4_MC06g06956	AUTOSOME	upregulated	no positive selection	ENOG410945K	Inherit_from_KOG:_origin_recognition_complex_subunit
MvSl-1064-A1-R4_MC06g06962	AUTOSOME	upregulated	no positive selection	ENOG41091AK	UDP-glucose_6-dehydrogenase
MvSl-1064-A1-R4_MC06g06965	AUTOSOME	upregulated	no positive selection	ENOG410943Q	RING-like_domain
MvSl-1064-A1-R4_MC06g06969	AUTOSOME	upregulated	no positive selection	ENOG41094E4	RNA_recognition_motif._(a.k.a._RRM,_RBD,_or_RNP_domain)
MvSl-1064-A1-R4_MC06g06982	AUTOSOME	upregulated	no positive selection	ENOG41093C0	Mitochondrial_ribosomal_death-associated_protein_3
MvSl-1064-A1-R4_MC06g06987	AUTOSOME	upregulated	no positive selection	NA	NA
MvSl-1064-A1-R4_MC06g06992	AUTOSOME	upregulated	no positive selection	ENOG410996T	Spc19
MvSl-1064-A1-R4_MC06g06994	AUTOSOME	upregulated	no positive selection	ENOG4109229	Component_of_the_eukaryotic_translation_initiation_factor_3_(eIF-3)_complex,_which_is_involved_in_protein_synthesis_and,_together_with_other_initiation_factors,_stimulates_binding_of_mRNA_and_methionyl-tRNAi_to_the_40S_ribosome_(By_similarity)
MvSl-1064-A1-R4_MC06g07001	AUTOSOME	upregulated	no positive selection	ENOG41093F1	Mitochondrial_inner_membrane_protein
MvSl-1064-A1-R4_MC06g07002	AUTOSOME	upregulated	no positive selection	NA	NA
MvSl-1064-A1-R4_MC06g07011	AUTOSOME	upregulated	no positive selection	ENOG41093WM	Sm
MvSl-1064-A1-R4_MC06g07022	AUTOSOME	upregulated	no positive selection	ENOG41093RG	Protein_of_unknown_function_DUF262
MvSl-1064-A1-R4_MC06g07023	AUTOSOME	upregulated	no positive selection	ENOG41095YQ	NA
MvSl-1064-A1-R4_MC06g07027	AUTOSOME	upregulated	no positive selection	ENOG41092D4	Insulinase_(Peptidase_family_M16)
MvSl-1064-A1-R4_MC06g07029	AUTOSOME	upregulated	no positive selection	ENOG410931T	Pfam:efhand
MvSl-1064-A1-R4_MC06g07041	AUTOSOME	upregulated	no positive selection	ENOG410945W	Inherit_from_fuNOG:_polyadenylation_factor_subunit_CstF64
MvSl-1064-A1-R4_MC06g07044	AUTOSOME	upregulated	no positive selection	ENOG410914R	Regulator_of_chromosome_condensation_(RCC1)_repeat
MvSl-1064-A1-R4_MC06g07049	AUTOSOME	upregulated	no positive selection	ENOG41095DU	Ribosomal_protein_S21
MvSl-1064-A1-R4_MC06g07054	AUTOSOME	upregulated	no positive selection	ENOG41095W7	Prefoldin_subunit
MvSl-1064-A1-R4_MC06g07055	AUTOSOME	upregulated	no positive selection	ENOG410924Z	Polyprenyl_synthetase
MvSl-1064-A1-R4_MC06g07057	AUTOSOME	upregulated	no positive selection	ENOG41091XV	Calreticulin_family
MvSl-1064-A1-R4_MC06g07122	AUTOSOME	upregulated	no positive selection	ENOG41091ZV	60S_acidic_ribosomal_protein
MvSl-1064-A1-R4_MC06g07133	AUTOSOME	upregulated	no positive selection	ENOG410926A	CAMK_CAMKL_GIN4_protein_kinase
MvSl-1064-A1-R4_MC06g07134	AUTOSOME	upregulated	no positive selection	ENOG410936U	Mitochondrial_glycoprotein
MvSl-1064-A1-R4_MC06g07138	AUTOSOME	upregulated	no positive selection	ENOG410936A	Carboxylesterase_family
MvSl-1064-A1-R4_MC06g07156	AUTOSOME	upregulated	no positive selection	ENOG41093Y2	60S_ribosomal_protein_L14
MvSl-1064-A1-R4_MC06g07160	AUTOSOME	upregulated	no positive selection	ENOG410914N	MutS_domain_II
MvSl-1064-A1-R4_MC06g07161	AUTOSOME	upregulated	no positive selection	ENOG41095HR	Inherit_from_KOG:_Meiotic_recombination_protein_dmc1
MvSl-1064-A1-R4_MC06g07170	AUTOSOME	upregulated	no positive selection	ENOG4109173	Protein_tyrosine_kinase
MvSl-1064-A1-R4_MC06g07182	AUTOSOME	upregulated	no positive selection	ENOG41091YE	ubiquinol-cytochrome_C_reductase_complex_core_protein_2
MvSl-1064-A1-R4_MC06g07184	AUTOSOME	upregulated	no positive selection	ENOG41091A3	ATP-dependent_serine_protease_that_mediates_the_selective_degradation_of_misfolded,_unassembled_or_oxidatively_damaged_polypeptides_as_well_as_certain_short-lived_regulatory_proteins_in_the_mitochondrial_matrix._May_also_have_a_chaperone_function_in_the_assembly_of_inner_membrane_protein_complexes._Participates_in_the_regulation_of_mitochondrial_gene_expression_and_in_the_maintenance_of_the_integ…
MvSl-1064-A1-R4_MC06g07192	AUTOSOME	upregulated	no positive selection	ENOG41091X4	Protein_arginine_n-methyltransferase
MvSl-1064-A1-R4_MC06g07193	AUTOSOME	upregulated	no positive selection	ENOG41093DY	Ribosomal_protein_S5,_C-terminal_domain
MvSl-1064-A1-R4_MC06g07203	AUTOSOME	upregulated	no positive selection	ENOG41092UR	CBF/Mak21_family
MvSl-1064-A1-R4_MC06g07205	AUTOSOME	upregulated	no positive selection	NA	NA
MvSl-1064-A1-R4_MC06g07207	AUTOSOME	upregulated	no positive selection	ENOG41093PY	Cytochrome_b5-like_Heme/Steroid_binding_domain
MvSl-1064-A1-R4_MC06g07210	AUTOSOME	upregulated	no positive selection	ENOG41091FX	Regulatory_subunit_of_the_poly(A)-nuclease_(PAN)_deadenylation_complex_involved_in_cytoplasmic_mRNA_turnover._PAN_specifically_shortens_poly(A)_tails_of_RNA_when_the_poly(A)_stretch_is_bound_by_polyadenylate-binding_protein_PAB1._Deadenylation_of_the_3'-tail_to_a_length_that_is_too_short_to_bind_PAB1_induces_mRNA_decay._May_also_be_involved_in_post-_transcriptional_maturation_of_mRNA_poly(A)_tail…
MvSl-1064-A1-R4_MC06g07220	AUTOSOME	upregulated	no positive selection	ENOG41091GS	The_proteasome_is_a_multicatalytic_proteinase_complex_which_is_characterized_by_its_ability_to_cleave_peptides_with_Arg,_Phe,_Tyr,_Leu,_and_Glu_adjacent_to_the_leaving_group_at_neutral_or_slightly_basic_pH._The_proteasome_has_an_ATP-dependent_proteolytic_activity_(By_similarity)
MvSl-1064-A1-R4_MC06g07225	AUTOSOME	upregulated	no positive selection	ENOG4109140	Phosphoribosyl-AMP_cyclohydrolase
MvSl-1064-A1-R4_MC06g07229	AUTOSOME	upregulated	no positive selection	ENOG41095TY	Inherit_from_KOG:_Metaxin_3
MvSl-1064-A1-R4_MC06g07234	AUTOSOME	upregulated	no positive selection	ENOG41091ZH	Glyco_18
MvSl-1064-A1-R4_MC06g07237	AUTOSOME	upregulated	no positive selection	ENOG410910X	Stereospecific_condensation_of_phosphoenolpyruvate_(PEP)_and_D-erythrose-4-phosphate_(E4P)_giving_rise_to_3-deoxy-D-_arabino-heptulosonate-7-phosphate_(DAHP)_(By_similarity)
MvSl-1064-A1-R4_MC06g07240	AUTOSOME	upregulated	no positive selection	ENOG410913U	NAD-dependent_glycerol-3-phosphate_dehydrogenase_C-terminus
MvSl-1064-A1-R4_MC06g07251	AUTOSOME	upregulated	no positive selection	ENOG41093ZZ	54S_ribosomal_protein
MvSl-1064-A1-R4_MC06g07253	AUTOSOME	upregulated	no positive selection	ENOG410937S	Inherit_from_opiNOG:_AlkB,_alkylation_repair_homolog_1_(E._coli)
MvSl-1064-A1-R4_MC06g07254	AUTOSOME	upregulated	no positive selection	ENOG41093QD	Succinate_dehydrogenase/Fumarate_reductase_transmembrane_subunit
MvSl-1064-A1-R4_MC06g07261	AUTOSOME	upregulated	no positive selection	ENOG41093ZP	TLC_domain
MvSl-1064-A1-R4_MC06g07268	AUTOSOME	upregulated	no positive selection	ENOG41091DZ	Pfam:Sec3
MvSl-1064-A1-R4_MC06g07273	AUTOSOME	upregulated	no positive selection	ENOG410918P	K01689_enolase_EC_4.2.1.11
MvSl-1064-A1-R4_MC06g07284	AUTOSOME	upregulated	no positive selection	ENOG4109219	Respiratory-chain_NADH_dehydrogenase,_49_Kd_subunit
MvSl-1064-A1-R4_MC06g07300	AUTOSOME	upregulated	no positive selection	ENOG41092P2	UBCc
MvSl-1064-A1-R4_MC06g07301	AUTOSOME	upregulated	no positive selection	ENOG41092D1	reductase
MvSl-1064-A1-R4_MC06g07303	AUTOSOME	upregulated	no positive selection	ENOG41092PN	R3H_domain
MvSl-1064-A1-R4_MC06g07310	AUTOSOME	upregulated	no positive selection	ENOG410917X	Cysteine_synthase
MvSl-1064-A1-R4_MC06g07328	AUTOSOME	upregulated	no positive selection	ENOG41093AM	ZnF_C2H2
MvSl-1064-A1-R4_MC06g07330	AUTOSOME	upregulated	no positive selection	ENOG410935M	rRNA_processing_protein_RRP1
MvSl-1064-A1-R4_MC06g07331	AUTOSOME	upregulated	no positive selection	ENOG41091V5	t-complex_protein_1
MvSl-1064-A1-R4_MC06g07333	AUTOSOME	upregulated	no positive selection	ENOG4109128	Aldehyde_dehydrogenase_family
MvSl-1064-A1-R4_MC06g07338	AUTOSOME	upregulated	no positive selection	ENOG41091RP	CobB/CobQ-like_glutamine_amidotransferase_domain
MvSl-1064-A1-R4_MC06g07341	AUTOSOME	upregulated	no positive selection	ENOG41091AB	biotin_synthase
MvSl-1064-A1-R4_MC06g07345	AUTOSOME	upregulated	no positive selection	ENOG410942J	Mitochondrial_ATP_synthase_g_subunit
MvSl-1064-A1-R4_MC06g07351	AUTOSOME	upregulated	no positive selection	ENOG41091US	Plays_an_important_role_in_the_de_novo_pathway_and_in_the_salvage_pathway_of_purine_nucleotide_biosynthesis._Catalyzes_the_first
MvSl-1064-A1-R4_MC06g07358	AUTOSOME	upregulated	no positive selection	ENOG41095EM	Cellulase_(glycosyl_hydrolase_family_5)
MvSl-1064-A1-R4_MC06g07361	AUTOSOME	upregulated	no positive selection	ENOG41098PR	NA
MvSl-1064-A1-R4_MC06g07364	AUTOSOME	upregulated	no positive selection	ENOG410911T	Succinate_dehydrogenase_flavoprotein_subunit
MvSl-1064-A1-R4_MC06g07391	AUTOSOME	upregulated	no positive selection	ENOG410934G	Cytochrome_c/c1_heme_lyase
MvSl-1064-A1-R4_MC06g07393	AUTOSOME	upregulated	no positive selection	ENOG410934Y	40s_ribosomal_protein_s15
MvSl-1064-A1-R4_MC06g07399	AUTOSOME	upregulated	no positive selection	ENOG41094FV	DASH_complex_subunit_Dad3
MvSl-1064-A1-R4_MC06g07405	AUTOSOME	upregulated	no positive selection	ENOG41091UZ	IPPc
MvSl-1064-A1-R4_MC06g07406	AUTOSOME	upregulated	no positive selection	ENOG41094FJ	Afadin-_and_alpha_-actinin-Binding
MvSl-1064-A1-R4_MC06g07422	AUTOSOME	upregulated	no positive selection	ENOG410946W	Ribosomal_protein_P2
MvSl-1064-A1-R4_MC06g07423	AUTOSOME	upregulated	no positive selection	ENOG41091T3	26S_proteasome_subunit_RPN7
MvSl-1064-A1-R4_MC06g07424	AUTOSOME	upregulated	no positive selection	ENOG41091J1	PAM
MvSl-1064-A1-R4_MC06g07425	AUTOSOME	upregulated	no positive selection	ENOG41091XT	60S_ribosomal_protein_L10
MvSl-1064-A1-R4_MC06g07427	AUTOSOME	upregulated	no positive selection	ENOG41092A9	Produces_ATP_from_ADP_in_the_presence_of_a_proton_gradient_across_the_membrane_(By_similarity)
MvSl-1064-A1-R4_MC06g07430	AUTOSOME	upregulated	no positive selection	ENOG410934E	FF_domain
MvSl-1064-A1-R4_MC06g07432	AUTOSOME	upregulated	no positive selection	ENOG41093PH	Cyclin-dependent_kinase_regulatory_subunit
MvSl-1064-A1-R4_MC06g07441	AUTOSOME	upregulated	no positive selection	ENOG410937F	Protein_prenyltransferase_alpha_subunit_repeat
MvSl-1064-A1-R4_MC06g07442	AUTOSOME	upregulated	no positive selection	ENOG410948G	NA
MvSl-1064-A1-R4_MC06g07457	AUTOSOME	upregulated	no positive selection	ENOG41092SY	This_protein_is_an_auxiliary_protein_of_DNA_polymerase_delta_and_is_involved_in_the_control_of_eukaryotic_DNA_replication_by_increasing_the_polymerase's_processibility_during_elongation_of_the_leading_strand_(By_similarity)
MvSl-1064-A1-R4_MC06g07464	AUTOSOME	upregulated	no positive selection	ENOG41092ZP	HORMA_domain
MvSl-1064-A1-R4_MC06g07466	AUTOSOME	upregulated	no positive selection	ENOG41099AK	LA
MvSl-1064-A1-R4_MC06g07468	AUTOSOME	upregulated	no positive selection	ENOG41091Z6	SIS_domain
MvSl-1064-A1-R4_MC06g07474	AUTOSOME	upregulated	no positive selection	ENOG410921S	Hydroxymethylglutaryl-coenzyme_A_synthase_N_terminal
MvSl-1064-A1-R4_MC06g07480	AUTOSOME	upregulated	no positive selection	ENOG410927I	PMC2NT_(NUC016)_domain
MvSl-1064-A1-R4_MC06g07482	AUTOSOME	upregulated	no positive selection	ENOG410945B	RNA_recognition_motif._(a.k.a._RRM,_RBD,_or_RNP_domain)
MvSl-1064-A1-R4_MC06g07488	AUTOSOME	upregulated	no positive selection	ENOG41096BQ	NA
MvSl-1064-A1-R4_MC06g07504	AUTOSOME	upregulated	no positive selection	ENOG4109348	NA
MvSl-1064-A1-R4_MC06g07521	AUTOSOME	upregulated	no positive selection	ENOG410944D	MADS
MvSl-1064-A1-R4_MC06g07522	AUTOSOME	upregulated	no positive selection	ENOG410960X	NA
MvSl-1064-A1-R4_MC06g07525	AUTOSOME	upregulated	no positive selection	ENOG41092VQ	DnaJ
MvSl-1064-A1-R4_MC06g07532	AUTOSOME	upregulated	no positive selection	ENOG41093HV	RRM
MvSl-1064-A1-R4_MC07g07551	AUTOSOME	upregulated	no positive selection	ENOG4109197	AMP-binding_enzyme
MvSl-1064-A1-R4_MC07g07564	AUTOSOME	upregulated	no positive selection	ENOG41093WI	Complex_I_intermediate-associated_protein_30_(CIA30)
MvSl-1064-A1-R4_MC07g07567	AUTOSOME	upregulated	no positive selection	ENOG410920Y	CAMK_CAMKL_CHK1_protein_kinase
MvSl-1064-A1-R4_MC07g07568	AUTOSOME	upregulated	no positive selection	ENOG4109496	Nucleosome_assembly_protein_(NAP)
MvSl-1064-A1-R4_MC07g07589	AUTOSOME	upregulated	no positive selection	ENOG41092SH	Eukaryotic_aspartyl_protease
MvSl-1064-A1-R4_MC07g07610	AUTOSOME	upregulated	no positive selection	ENOG410943W	Protein_of_unknown_function_(DUF1777)
MvSl-1064-A1-R4_MC07g07614	AUTOSOME	upregulated	no positive selection	ENOG41092JP	DNA_repair_and_recombination_protein_pif1
MvSl-1064-A1-R4_MC07g07633	AUTOSOME	upregulated	no positive selection	ENOG41091YJ	NADH-ubiquinone_oxidoreductase
MvSl-1064-A1-R4_MC07g07638	AUTOSOME	upregulated	no positive selection	ENOG41092ZQ	RanBD
MvSl-1064-A1-R4_MC07g07639	AUTOSOME	upregulated	no positive selection	ENOG41094NI	ribosomal_protein
MvSl-1064-A1-R4_MC07g07654	AUTOSOME	upregulated	no positive selection	ENOG41092W0	60S_ribosomal_protein_l9
MvSl-1064-A1-R4_MC07g07683	AUTOSOME	upregulated	no positive selection	ENOG410930T	RNA_recognition_motif._(a.k.a._RRM,_RBD,_or_RNP_domain)
MvSl-1064-A1-R4_MC07g07684	AUTOSOME	upregulated	no positive selection	ENOG4109801	KR_domain
MvSl-1064-A1-R4_MC07g07685	AUTOSOME	upregulated	no positive selection	ENOG41092VR	WD_domain,_G-beta_repeat
MvSl-1064-A1-R4_MC07g07689	AUTOSOME	upregulated	no positive selection	ENOG41091F0	Ribonucleotide_reductase,_small_chain
MvSl-1064-A1-R4_MC07g07695	AUTOSOME	upregulated	no positive selection	ENOG41094JQ	NADH-ubiquinone_oxidoreductase_12_kda_subunit
MvSl-1064-A1-R4_MC07g07710	AUTOSOME	upregulated	no positive selection	ENOG41092UN	Sec34-like_family
MvSl-1064-A1-R4_MC07g07715	AUTOSOME	upregulated	no positive selection	ENOG410944J	SHNi-TPR
MvSl-1064-A1-R4_MC07g07721	AUTOSOME	upregulated	no positive selection	ENOG41095ND	Chromo_shadow_domain
MvSl-1064-A1-R4_MC07g07724	AUTOSOME	upregulated	no positive selection	ENOG4109590	Rare_lipoprotein_A_(RlpA)-like_double-psi_beta-barrel
MvSl-1064-A1-R4_MC07g07731	AUTOSOME	upregulated	no positive selection	ENOG410927J	Sugar_(and_other)_transporter
MvSl-1064-A1-R4_MC07g07737	AUTOSOME	upregulated	no positive selection	ENOG410984U	Cytochrome_c_oxidase_subunit_VIIc
MvSl-1064-A1-R4_MC07g07745	AUTOSOME	upregulated	no positive selection	ENOG4109590	Rare_lipoprotein_A_(RlpA)-like_double-psi_beta-barrel
MvSl-1064-A1-R4_MC07g07755	AUTOSOME	upregulated	no positive selection	ENOG41092ST	NA
MvSl-1064-A1-R4_MC07g07763	AUTOSOME	upregulated	no positive selection	ENOG41091P3	3-oxo-5-alpha-steroid_4-dehydrogenase
MvSl-1064-A1-R4_MC07g07769	AUTOSOME	upregulated	no positive selection	ENOG4109250	Prolyl_oligopeptidase_family
MvSl-1064-A1-R4_MC07g07784	AUTOSOME	upregulated	no positive selection	ENOG41093BU	Sensitive_to_high_expression_protein_9
MvSl-1064-A1-R4_MC07g07789	AUTOSOME	upregulated	no positive selection	ENOG410949A	NA
MvSl-1064-A1-R4_MC07g07796	AUTOSOME	upregulated	no positive selection	ENOG41095QM	NA
MvSl-1064-A1-R4_MC07g07797	AUTOSOME	upregulated	no positive selection	ENOG41091M8	Dihydroorotate_dehydrogenase
MvSl-1064-A1-R4_MC07g07798	AUTOSOME	upregulated	no positive selection	ENOG410922T	Control_of_topological_states_of_DNA_by_transient_breakage_and_subsequent_rejoining_of_DNA_strands._Topoisomerase_II_makes_double-strand_breaks_(By_similarity)
MvSl-1064-A1-R4_MC07g07800	AUTOSOME	upregulated	no positive selection	ENOG41094MT	Replication_factor_A_protein_3
MvSl-1064-A1-R4_MC07g07801	AUTOSOME	upregulated	no positive selection	ENOG41093M2	60s_ribosomal_protein
MvSl-1064-A1-R4_MC07g07805	AUTOSOME	upregulated	no positive selection	ENOG410928Q	mannose-6-phosphate_isomerase
MvSl-1064-A1-R4_MC07g07806	AUTOSOME	upregulated	no positive selection	ENOG410915V	Fn3-like_domain_(DUF1034)
MvSl-1064-A1-R4_MC07g07808	AUTOSOME	upregulated	no positive selection	ENOG41099A9	IBN_N
MvSl-1064-A1-R4_MC07g07814	AUTOSOME	upregulated	no positive selection	ENOG41093F3	Component_of_the_eukaryotic_translation_initiation_factor_3_(eIF-3)_complex,_which_is_involved_in_protein_synthesis_and,_together_with_other_initiation_factors,_stimulates_binding_of_mRNA_and_methionyl-tRNAi_to_the_40S_ribosome_(By_similarity)
MvSl-1064-A1-R4_MC07g07832	AUTOSOME	upregulated	no positive selection	ENOG41091WP	KISc
MvSl-1064-A1-R4_MC07g07838	AUTOSOME	upregulated	no positive selection	ENOG41093W5	NA
MvSl-1064-A1-R4_MC07g07839	AUTOSOME	upregulated	no positive selection	ENOG41091TE	CPSase_sm_chain
MvSl-1064-A1-R4_MC07g07844	AUTOSOME	upregulated	no positive selection	ENOG410913A	ATP-dependent_RNA_helicase_required_for_ribosome_biogenesis._Involved_in_the_release_of_U14_snoRNA_in_pre-ribosomal_complexes._Required_for_pre-rRNA_cleavage_at_site_A2_(By_similarity)
MvSl-1064-A1-R4_MC07g07856	AUTOSOME	upregulated	no positive selection	ENOG41092XQ	Endonuclease_that_specifically_degrades_the_RNA_of_RNA-_DNA_hybrids_(By_similarity)
MvSl-1064-A1-R4_MC07g07860	AUTOSOME	upregulated	no positive selection	ENOG41093DB	Mitochondrial_carrier_protein
MvSl-1064-A1-R4_MC07g07861	AUTOSOME	upregulated	no positive selection	ENOG41092TH	Eukaryotic_initiation_factor_4E
MvSl-1064-A1-R4_MC07g07873	AUTOSOME	upregulated	no positive selection	ENOG410944P	Ribosomal_protein_S7p/S5e
MvSl-1064-A1-R4_MC07g07876	AUTOSOME	upregulated	no positive selection	ENOG410938M	Uncharacterised_ACR,_YagE_family_COG1723
MvSl-1064-A1-R4_MC07g07878	AUTOSOME	upregulated	no positive selection	ENOG410927W	This_protein_promotes_the_GTP-dependent_binding_of_aminoacyl-tRNA_to_the_A-site_of_ribosomes_during_protein_biosynthesis_(By_similarity)
MvSl-1064-A1-R4_MC07g07879	AUTOSOME	upregulated	no positive selection	ENOG41093EV	60S_ribosomal_protein_L31
MvSl-1064-A1-R4_MC07g07891	AUTOSOME	upregulated	no positive selection	ENOG41091YV	ATP-binding_RNA_helicase_involved_in_the_biogenesis_of_60S_ribosomal_subunits_and_is_required_for_the_normal_formation_of_25S_and_5.8S_rRNAs_(By_similarity)
MvSl-1064-A1-R4_MC07g07893	AUTOSOME	upregulated	no positive selection	ENOG41093VV	SGS_domain
MvSl-1064-A1-R4_MC07g07908	AUTOSOME	upregulated	no positive selection	ENOG41091T5	Methylenetetrahydrofolate_reductase
MvSl-1064-A1-R4_MC07g07909	AUTOSOME	upregulated	no positive selection	ENOG41093WR	Inherit_from_opiNOG:_Nitric_oxide_synthase_interacting_protein
MvSl-1064-A1-R4_MC07g07913	AUTOSOME	upregulated	no positive selection	ENOG41097R5	Dehydrogenase_E1_component
MvSl-1064-A1-R4_MC07g07916	AUTOSOME	upregulated	no positive selection	ENOG410921A	Structural_maintenance_of_chromosomes_protein
MvSl-1064-A1-R4_MC07g07917	AUTOSOME	upregulated	no positive selection	ENOG41091IG	Nuclear_matrix_protein_NMP200
MvSl-1064-A1-R4_MC07g07921	AUTOSOME	upregulated	no positive selection	ENOG410931K	UBCc
MvSl-1064-A1-R4_MC07g07922	AUTOSOME	upregulated	no positive selection	ENOG41093KG	Paf1
MvSl-1064-A1-R4_MC07g07929	AUTOSOME	upregulated	no positive selection	ENOG4109113	acetyl-CoA_carboxylase
MvSl-1064-A1-R4_MC07g07939	AUTOSOME	upregulated	no positive selection	ENOG41093ST	cytochrome_C_oxidase
MvSl-1064-A1-R4_MC07g07943	AUTOSOME	upregulated	no positive selection	ENOG4109283	Ketol-acid_reductoisomerase
MvSl-1064-A1-R4_MC07g07951	AUTOSOME	upregulated	no positive selection	ENOG41093IQ	Glycosyl_transferases_group_1
MvSl-1064-A1-R4_MC07g07954	AUTOSOME	upregulated	no positive selection	ENOG41092TQ	Tim44-like_domain
MvSl-1064-A1-R4_MC07g07959	AUTOSOME	upregulated	no positive selection	ENOG410941G	Spc7_kinetochore_protein
MvSl-1064-A1-R4_MC07g07970	AUTOSOME	upregulated	no positive selection	ENOG41095DG	Pfam:UPF0057
MvSl-1064-A1-R4_MC07g08004	AUTOSOME	upregulated	no positive selection	NA	NA
MvSl-1064-A1-R4_MC07g08011	AUTOSOME	upregulated	no positive selection	ENOG41091GW	argininosuccinate_synthase
MvSl-1064-A1-R4_MC07g08036	AUTOSOME	upregulated	no positive selection	ENOG41097AX	NA
MvSl-1064-A1-R4_MC07g08043	AUTOSOME	upregulated	no positive selection	ENOG4109393	Glutaredoxin
MvSl-1064-A1-R4_MC07g08044	AUTOSOME	upregulated	no positive selection	ENOG41093B3	Tetratricopeptide_repeat
MvSl-1064-A1-R4_MC07g08045	AUTOSOME	upregulated	no positive selection	ENOG410945R	DNL_zinc_finger
MvSl-1064-A1-R4_MC07g08046	AUTOSOME	upregulated	no positive selection	ENOG410944R	Apoptosis-antagonizing_transcription_factor,_C-terminal
MvSl-1064-A1-R4_MC07g08055	AUTOSOME	upregulated	no positive selection	ENOG41093SW	Erv1_/_Alr_family
MvSl-1064-A1-R4_MC07g08057	AUTOSOME	upregulated	no positive selection	NA	NA
MvSl-1064-A1-R4_MC07g08059	AUTOSOME	upregulated	no positive selection	ENOG410919G	40s_ribosomal_protein_s4
MvSl-1064-A1-R4_MC07g08060	AUTOSOME	upregulated	no positive selection	ENOG41091EW	The_proteasome_is_a_multicatalytic_proteinase_complex_which_is_characterized_by_its_ability_to_cleave_peptides_with_Arg,_Phe,_Tyr,_Leu,_and_Glu_adjacent_to_the_leaving_group_at_neutral_or_slightly_basic_pH._The_proteasome_has_an_ATP-dependent_proteolytic_activity_(By_similarity)
MvSl-1064-A1-R4_MC07g08061	AUTOSOME	upregulated	no positive selection	ENOG41094FD	Mitochondrial_intermembrane_chaperone_that_participates_in_the_import_and_insertion_of_multi-pass_transmembrane_proteins_into_the_mitochondrial_inner_membrane._Also_required_for_the_transfer_of_beta-barrel_precursors_from_the_TOM_complex_to_the_sorting_and_assembly_machinery_(SAM_complex)_of_the_outer_membrane._Acts_as_a_chaperone-like_protein_that_protects_the_hydrophobic_precursors_from_aggrega…
MvSl-1064-A1-R4_MC07g08062	AUTOSOME	upregulated	no positive selection	ENOG410932R	Aminotransferase_class_I_and_II
MvSl-1064-A1-R4_MC07g08063	AUTOSOME	upregulated	no positive selection	NA	NA
MvSl-1064-A1-R4_MC07g08066	AUTOSOME	upregulated	no positive selection	ENOG41091G7	KISc
MvSl-1064-A1-R4_MC07g08085	AUTOSOME	upregulated	no positive selection	ENOG41091XX	phosphomannomutase
MvSl-1064-A1-R4_MC07g08086	AUTOSOME	upregulated	no positive selection	ENOG41093WN	60s_ribosomal_protein
MvSl-1064-A1-R4_MC07g08088	AUTOSOME	upregulated	no positive selection	ENOG4109472	RNA_polymerase_III_RPC4
MvSl-1064-A1-R4_MC07g08093	AUTOSOME	upregulated	no positive selection	ENOG41093W3	Inherit_from_euNOG:_Conserved_hypothetical_protein
MvSl-1064-A1-R4_MC07g08097	AUTOSOME	upregulated	no positive selection	ENOG410929Z	Cyclin,_C-terminal_domain
MvSl-1064-A1-R4_MC07g08114	AUTOSOME	upregulated	no positive selection	ENOG410912A	Protein_of_unknown_function_(DUF1212)
MvSl-1064-A1-R4_MC07g08115	AUTOSOME	upregulated	no positive selection	ENOG41091WC	Proteasome/cyclosome_repeat
MvSl-1064-A1-R4_MC07g08116	AUTOSOME	upregulated	no positive selection	ENOG41095K2	NA
MvSl-1064-A1-R4_MC07g08118	AUTOSOME	upregulated	no positive selection	ENOG4109232	Cell_division_control_protein_45
MvSl-1064-A1-R4_MC07g08120	AUTOSOME	upregulated	no positive selection	ENOG41094AN	RNA_recognition_motif._(a.k.a._RRM,_RBD,_or_RNP_domain)
MvSl-1064-A1-R4_MC07g08121	AUTOSOME	upregulated	no positive selection	ENOG41091D6	arginase_EC_3.5.3.1
MvSl-1064-A1-R4_MC07g08122	AUTOSOME	upregulated	no positive selection	ENOG410910Q	Beta-eliminating_lyase
MvSl-1064-A1-R4_MC07g08129	AUTOSOME	upregulated	no positive selection	ENOG41091QN	Cytochrome_C1_family
MvSl-1064-A1-R4_MC07g08139	AUTOSOME	upregulated	no positive selection	ENOG41097A7	CFEM_domain
MvSl-1064-A1-R4_MC07g08155	AUTOSOME	upregulated	no positive selection	ENOG41093FD	mitochondrial_import_inner_membrane_translocase_subunit_tim23
MvSl-1064-A1-R4_MC07g08156	AUTOSOME	upregulated	no positive selection	ENOG41092VH	Component_of_the_eukaryotic_translation_initiation_factor_3_(eIF-3)_complex,_which_is_involved_in_protein_synthesis_and,_together_with_other_initiation_factors,_stimulates_binding_of_mRNA_and_methionyl-tRNAi_to_the_40S_ribosome_(By_similarity)
MvSl-1064-A1-R4_MC07g08166	AUTOSOME	upregulated	no positive selection	NA	NA
MvSl-1064-A1-R4_MC07g08169	AUTOSOME	upregulated	no positive selection	ENOG41093NJ	Binds_to_the_23S_rRNA_(By_similarity)
MvSl-1064-A1-R4_MC07g08170	AUTOSOME	upregulated	no positive selection	ENOG41092UQ	ubiquitin-40S_ribosomal_protein_S31_fusion_protein
MvSl-1064-A1-R4_MC07g08177	AUTOSOME	upregulated	no positive selection	ENOG41091XF	ATPase_family_associated_with_various_cellular_activities_(AAA)
MvSl-1064-A1-R4_MC07g08178	AUTOSOME	upregulated	no positive selection	ENOG410915G	Pyruvate_kinase
MvSl-1064-A1-R4_MC07g08180	AUTOSOME	upregulated	no positive selection	ENOG41096X8	Metalloprotease
MvSl-1064-A1-R4_MC07g08181	AUTOSOME	upregulated	no positive selection	ENOG41093DE	Uncharacterized_conserved_protein_(DUF2036)
MvSl-1064-A1-R4_MC07g08187	AUTOSOME	upregulated	no positive selection	ENOG410933K	40S_ribosomal_protein_S14
MvSl-1064-A1-R4_MC07g08188	AUTOSOME	upregulated	no positive selection	ENOG41094AC	WD_domain,_G-beta_repeat
MvSl-1064-A1-R4_MC07g08199	AUTOSOME	upregulated	no positive selection	ENOG4109291	Aamy
MvSl-1064-A1-R4_MC07g08223	AUTOSOME	upregulated	no positive selection	ENOG41093AF	Ubiquitin-conjugating_enzyme
MvSl-1064-A1-R4_MC08g08279	AUTOSOME	upregulated	no positive selection	ENOG410915N	lysyl-tRNA_synthetase
MvSl-1064-A1-R4_MC08g08280	AUTOSOME	upregulated	no positive selection	ENOG41093U3	Trm112p-like_protein
MvSl-1064-A1-R4_MC08g08281	AUTOSOME	upregulated	no positive selection	ENOG41093VG	Acts_as_a_component_of_the_essential_kinetochore-_associated_NDC80_complex,_which_is_required_for_chromosome_segregation_and_spindle_checkpoint_activity_(By_similarity)
MvSl-1064-A1-R4_MC08g08287	AUTOSOME	upregulated	no positive selection	ENOG41094KZ	4F5_protein_family
MvSl-1064-A1-R4_MC08g08289	AUTOSOME	upregulated	no positive selection	ENOG410929F	chitin_deacetylase-like_mannoprotein_MP98
MvSl-1064-A1-R4_MC08g08294	AUTOSOME	upregulated	no positive selection	ENOG41091UE	ornithine_carbamoyltransferase
MvSl-1064-A1-R4_MC08g08299	AUTOSOME	upregulated	no positive selection	ENOG410929W	Component_of_the_eukaryotic_translation_initiation_factor_3_(eIF-3)_complex,_which_is_involved_in_protein_synthesis_and,_together_with_other_initiation_factors,_stimulates_binding_of_mRNA_and_methionyl-tRNAi_to_the_40S_ribosome_(By_similarity)
MvSl-1064-A1-R4_MC08g08300	AUTOSOME	upregulated	no positive selection	ENOG410931E	ATP_synthase_delta_(OSCP)_subunit
MvSl-1064-A1-R4_MC08g08319	AUTOSOME	upregulated	no positive selection	ENOG41095W9	NA
MvSl-1064-A1-R4_MC08g08321	AUTOSOME	upregulated	no positive selection	ENOG41093ZH	peptidyl-prolyl_cis-trans_isomerase
MvSl-1064-A1-R4_MC08g08333	AUTOSOME	upregulated	no positive selection	ENOG41092MA	eIF4-gamma/eIF5/eIF2-epsilon
MvSl-1064-A1-R4_MC08g08339	AUTOSOME	upregulated	no positive selection	ENOG410920A	The_proteasome_is_a_multicatalytic_proteinase_complex_which_is_characterized_by_its_ability_to_cleave_peptides_with_Arg,_Phe,_Tyr,_Leu,_and_Glu_adjacent_to_the_leaving_group_at_neutral_or_slightly_basic_pH._The_proteasome_has_an_ATP-dependent_proteolytic_activity_(By_similarity)
MvSl-1064-A1-R4_MC08g08347	AUTOSOME	upregulated	no positive selection	ENOG41095BJ	NA
MvSl-1064-A1-R4_MC08g08350	AUTOSOME	upregulated	no positive selection	ENOG41095KM	delayed-type_hypersensitivity_antigen
MvSl-1064-A1-R4_MC08g08354	AUTOSOME	upregulated	no positive selection	ENOG41093GI	Inherit_from_fuNOG:_chromatin_remodeling
MvSl-1064-A1-R4_MC08g08356	AUTOSOME	upregulated	no positive selection	ENOG41092U8	Putative_Phosphatase
MvSl-1064-A1-R4_MC08g08357	AUTOSOME	upregulated	no positive selection	ENOG41093IN	Peptidyl-prolyl_cis-trans_isomerase
MvSl-1064-A1-R4_MC08g08364	AUTOSOME	upregulated	no positive selection	ENOG41091KB	Catalyzes_the_first_intracellular_reaction_of_sulfate_assimilation,_forming_adenosine-5'-phosphosulfate_(APS)_from_inorganic_sulfate_and_ATP._Plays_an_important_role_in_sulfate_activation_as_a_component_of_the_biosynthesis_pathway_of_sulfur-_containing_amino_acids_(By_similarity)
MvSl-1064-A1-R4_MC08g08374	AUTOSOME	upregulated	no positive selection	ENOG4109240	ribosome_biogenesis_protein_BRX1
MvSl-1064-A1-R4_MC08g08375	AUTOSOME	upregulated	no positive selection	ENOG41093KR	Inherit_from_fuNOG:_phosducin_family
MvSl-1064-A1-R4_MC08g08398	AUTOSOME	upregulated	no positive selection	ENOG41092J4	NEK_protein_kinase
MvSl-1064-A1-R4_MC08g08402	AUTOSOME	upregulated	no positive selection	ENOG41093WZ	Ribosomal_protein_S9/S16
MvSl-1064-A1-R4_MC08g08415	AUTOSOME	upregulated	no positive selection	ENOG41091R4	ARF
MvSl-1064-A1-R4_MC08g08424	AUTOSOME	upregulated	no positive selection	ENOG4109299	tRNA_synthetase_B5_domain
MvSl-1064-A1-R4_MC08g08425	AUTOSOME	upregulated	no positive selection	ENOG41091F3	Aminotransferase_class_I_and_II
MvSl-1064-A1-R4_MC08g08426	AUTOSOME	upregulated	no positive selection	ENOG41091SI	Essential_component_of_the_cytosolic_iron-sulfur_(Fe_S)_protein_assembly_machinery._Required_for_the_maturation_of_extramitochondrial_Fe_S_proteins_(By_similarity)
MvSl-1064-A1-R4_MC08g08433	AUTOSOME	upregulated	no positive selection	ENOG41094VT	NADH:flavin_oxidoreductase_/_NADH_oxidase_family
MvSl-1064-A1-R4_MC08g08441	AUTOSOME	upregulated	no positive selection	ENOG41092YN	40S_ribosomal_protein_S17
MvSl-1064-A1-R4_MC08g08442	AUTOSOME	upregulated	no positive selection	ENOG41092YQ	40s_ribosomal_protein_s22
MvSl-1064-A1-R4_MC08g08455	AUTOSOME	upregulated	no positive selection	ENOG41094B8	Protein_of_unknown_function_(DUF1279)
MvSl-1064-A1-R4_MC08g08458	AUTOSOME	upregulated	no positive selection	ENOG41093NB	WD_domain,_G-beta_repeat
MvSl-1064-A1-R4_MC08g08464	AUTOSOME	upregulated	no positive selection	ENOG41093IX	ZnF_DBF
MvSl-1064-A1-R4_MC08g08470	AUTOSOME	upregulated	no positive selection	ENOG41094PF	Single-strand_binding_protein_family
MvSl-1064-A1-R4_MC08g08475	AUTOSOME	upregulated	no positive selection	ENOG410929N	Peptidase_family_M13
MvSl-1064-A1-R4_MC08g08487	AUTOSOME	upregulated	no positive selection	ENOG4109477	Histone-like_transcription_factor_(CBF/NF-Y)_and_archaeal_histone
MvSl-1064-A1-R4_MC08g08488	AUTOSOME	upregulated	no positive selection	ENOG4109102	D-isomer_specific_2-hydroxyacid_dehydrogenase,_catalytic_domain
MvSl-1064-A1-R4_MC08g08489	AUTOSOME	upregulated	no positive selection	ENOG41092RQ	Zinc_finger_C-x8-C-x5-C-x3-H_type_(and_similar)
MvSl-1064-A1-R4_MC08g08500	AUTOSOME	upregulated	no positive selection	ENOG41093DF	mitochondrial_54S_ribosomal_protein_YmL47
MvSl-1064-A1-R4_MC08g08506	AUTOSOME	upregulated	no positive selection	ENOG41095NJ	DASH_complex_subunit_Dad1
MvSl-1064-A1-R4_MC08g08517	AUTOSOME	upregulated	no positive selection	NA	NA
MvSl-1064-A1-R4_MC08g08529	AUTOSOME	upregulated	no positive selection	ENOG41092UF	Required_for_the_first_step_of_diphthamide_biosynthesis,_the_transfer_of_3-amino-3-carboxypropyl_from_S-adenosyl-L-_methionine_to_a_histidine_residue._Diphthamide_is_a_post-_translational_modification_of_histidine_which_occurs_in_elongation_factor_2_(By_similarity)
MvSl-1064-A1-R4_MC08g08532	AUTOSOME	upregulated	no positive selection	ENOG4109450	60S_ribosomal_protein_L39
MvSl-1064-A1-R4_MC08g08541	AUTOSOME	upregulated	no positive selection	ENOG41092BG	Translation_initiation_factor
MvSl-1064-A1-R4_MC08g08545	AUTOSOME	upregulated	no positive selection	NA	NA
MvSl-1064-A1-R4_MC08g08547	AUTOSOME	upregulated	no positive selection	ENOG41094VE	Inherit_from_KOG:_oxidoreductase,_2OG-Fe(II)_oxygenase_family_protein
MvSl-1064-A1-R4_MC08g08559	AUTOSOME	upregulated	no positive selection	ENOG410915V	Fn3-like_domain_(DUF1034)
MvSl-1064-A1-R4_MC08g08560	AUTOSOME	upregulated	no positive selection	ENOG41094SR	NA
MvSl-1064-A1-R4_MC08g08562	AUTOSOME	upregulated	no positive selection	ENOG41096JB	Mitochondrial_ribosomal_protein_L51_/_S25_/_CI-B8_domain
MvSl-1064-A1-R4_MC08g08569	AUTOSOME	upregulated	no positive selection	ENOG410958U	Zinc-binding_dehydrogenase
MvSl-1064-A1-R4_MC08g08572	AUTOSOME	upregulated	no positive selection	ENOG41093RE	haloacid_dehalogenase-like_hydrolase
MvSl-1064-A1-R4_MC08g08573	AUTOSOME	upregulated	no positive selection	ENOG41092N2	Uncharacterized_protein_family_UPF0016
MvSl-1064-A1-R4_MC08g08575	AUTOSOME	upregulated	no positive selection	ENOG41092CJ	Mitochondrial_membrane_ATP_synthase_(F(1)F(0)_ATP_synthase_or_Complex_V)_produces_ATP_from_ADP_in_the_presence_of_a_proton_gradient_across_the_membrane_which_is_generated_by_electron_transport_complexes_of_the_respiratory_chain._F-type_ATPases_consist_of_two_structural_domains,_F(1)_-_containing_the_extramembraneous_catalytic_core,_and_F(0)_-_containing_the_membrane_proton_channel,_linked_togethe…
MvSl-1064-A1-R4_MC08g08577	AUTOSOME	upregulated	no positive selection	ENOG41094IV	NADH-ubiquinone_oxidoreductase_B12_subunit_family
MvSl-1064-A1-R4_MC08g08580	AUTOSOME	upregulated	no positive selection	ENOG41092VJ	40s_ribosomal_protein_s23
MvSl-1064-A1-R4_MC08g08581	AUTOSOME	upregulated	no positive selection	ENOG41093J4	Domain_of_unknown_function_(DUF2431)
MvSl-1064-A1-R4_MC08g08589	AUTOSOME	upregulated	no positive selection	ENOG41092BH	Utp13_specific_WD40_associated_domain
MvSl-1064-A1-R4_MC08g08592	AUTOSOME	upregulated	no positive selection	NA	NA
MvSl-1064-A1-R4_MC08g08593	AUTOSOME	upregulated	no positive selection	ENOG410933N	involved_in_pre-mRNA_splicing_(By_similarity)
MvSl-1064-A1-R4_MC08g08594	AUTOSOME	upregulated	no positive selection	ENOG41091QD	ribosomal_protein_S2
MvSl-1064-A1-R4_MC08g08597	AUTOSOME	upregulated	no positive selection	ENOG41091KY	MCM
MvSl-1064-A1-R4_MC08g08599	AUTOSOME	upregulated	no positive selection	ENOG41092YB	60S_ribosomal_protein_L27
MvSl-1064-A1-R4_MC08g08606	AUTOSOME	upregulated	no positive selection	ENOG41092J7	Required_for_the_assembly_and_or_stability_of_the_40S_ribosomal_subunit._Required_for_the_processing_of_the_20S_rRNA-_precursor_to_mature_18S_rRNA_in_a_late_step_of_the_maturation_of_40S_ribosomal_subunits_(By_similarity)
MvSl-1064-A1-R4_MC08g08608	AUTOSOME	upregulated	no positive selection	ENOG410910A	Possible_Fer4-like_domain_in_RNase_L_inhibitor,_RLI
MvSl-1064-A1-R4_MC08g08622	AUTOSOME	upregulated	no positive selection	ENOG41092AC	diphosphomevalonate_decarboxylase
MvSl-1064-A1-R4_MC08g08627	AUTOSOME	upregulated	no positive selection	ENOG41091GG	KH_domain
MvSl-1064-A1-R4_MC08g08631	AUTOSOME	upregulated	no positive selection	ENOG410938Q	Redoxin
MvSl-1064-A1-R4_MC08g08660	AUTOSOME	upregulated	no positive selection	ENOG4109127	cytochrome_c_peroxidase
MvSl-1064-A1-R4_MC08g08662	AUTOSOME	upregulated	no positive selection	ENOG41091MD	Translation-initiation_factor_2
MvSl-1064-A1-R4_MC08g08675	AUTOSOME	upregulated	no positive selection	ENOG41092SH	Eukaryotic_aspartyl_protease
MvSl-1064-A1-R4_MC08g08677	AUTOSOME	upregulated	no positive selection	ENOG410933I	UV_excision_repair_protein
MvSl-1064-A1-R4_MC08g08678	AUTOSOME	upregulated	no positive selection	ENOG410933I	UV_excision_repair_protein
MvSl-1064-A1-R4_MC08g08681	AUTOSOME	upregulated	no positive selection	ENOG41091VV	Ribose-5-phosphate_isomerase
MvSl-1064-A1-R4_MC08g08683	AUTOSOME	upregulated	no positive selection	ENOG41093KM	Protein_of_unknown_function_(DUF1168)
MvSl-1064-A1-R4_MC08g08687	AUTOSOME	upregulated	no positive selection	ENOG4109615	RasGEF_domain
MvSl-1064-A1-R4_MC08g08709	AUTOSOME	upregulated	no positive selection	ENOG410911A	Endoplasmic_Reticulum_Oxidoreductin_1_(ERO1)
MvSl-1064-A1-R4_MC08g08716	AUTOSOME	upregulated	no positive selection	ENOG41094KV	NA
MvSl-1064-A1-R4_MC08g08717	AUTOSOME	upregulated	no positive selection	ENOG41092NW	ARP2/3_complex_20_kDa_subunit_(ARPC4)
MvSl-1064-A1-R4_MC08g08724	AUTOSOME	upregulated	no positive selection	ENOG41091SP	Succinate_dehydrogenase_iron-sulfur_subunit
MvSl-1064-A1-R4_MC08g08725	AUTOSOME	upregulated	no positive selection	ENOG41092U0	PPIases_accelerate_the_folding_of_proteins._It_catalyzes_the_cis-trans_isomerization_of_proline_imidic_peptide_bonds_in_oligopeptides_(By_similarity)
MvSl-1064-A1-R4_MC08g08732	AUTOSOME	upregulated	no positive selection	ENOG410936Q	Domain_of_unknown_function_(DUF1977)
MvSl-1064-A1-R4_MC08g08741	AUTOSOME	upregulated	no positive selection	ENOG41092S7	STYKc
MvSl-1064-A1-R4_MC08g08761	AUTOSOME	upregulated	no positive selection	ENOG41095BV	short_chain_dehydrogenase
MvSl-1064-A1-R4_MC08g08767	AUTOSOME	upregulated	no positive selection	ENOG410940E	Transcription_elongation_factor_Elf1_like
MvSl-1064-A1-R4_MC08g08778	AUTOSOME	upregulated	no positive selection	ENOG4109463	NA
MvSl-1064-A1-R4_MC08g08779	AUTOSOME	upregulated	no positive selection	ENOG41091ZE	ChAPs_(Chs5p-Arf1p-binding_proteins)
MvSl-1064-A1-R4_MC08g08787	AUTOSOME	upregulated	no positive selection	ENOG41091UQ	regulatory_subunit
MvSl-1064-A1-R4_MC08g08794	AUTOSOME	upregulated	no positive selection	ENOG410935V	Mitochondrial_import_inner_membrane_translocase_subunit
MvSl-1064-A1-R4_MC08g08796	AUTOSOME	upregulated	no positive selection	ENOG41092BI	Ferredoxin-fold_anticodon_binding_domain
MvSl-1064-A1-R4_MC08g08799	AUTOSOME	upregulated	no positive selection	ENOG410994R	rRNA_processing
MvSl-1064-A1-R4_MC08g08806	AUTOSOME	upregulated	no positive selection	ENOG41095T5	SAP_domain
MvSl-1064-A1-R4_MC08g08816	AUTOSOME	upregulated	no positive selection	ENOG41092BJ	ATP-binding_RNA_helicase_involved_in_the_biogenesis_of_60S_ribosomal_subunits_and_is_required_for_the_normal_formation_of_25S_and_5.8S_rRNAs_(By_similarity)
MvSl-1064-A1-R4_MC08g08857	AUTOSOME	upregulated	no positive selection	NA	NA
MvSl-1064-A1-R4_MC08g08859	AUTOSOME	upregulated	no positive selection	ENOG41093VF	Iron-sulphur_cluster_biosynthesis
MvSl-1064-A1-R4_MC08g08872	AUTOSOME	upregulated	no positive selection	ENOG41093I5	ATP_synthase,_Delta/Epsilon_chain,_beta-sandwich_domain
MvSl-1064-A1-R4_MC09-2g08932	AUTOSOME	upregulated	no positive selection	ENOG41094EQ	BIR
MvSl-1064-A1-R4_MC09-2g08960	AUTOSOME	upregulated	no positive selection	ENOG41093RN	Taurine_catabolism_dioxygenase_TauD,_TfdA_family
MvSl-1064-A1-R4_MC09-2g08961	AUTOSOME	upregulated	no positive selection	ENOG41095GD	LysM_domain
MvSl-1064-A1-R4_MC09-2g08979	AUTOSOME	upregulated	no positive selection	ENOG410943U	SNF5_/_SMARCB1_/_INI1
MvSl-1064-A1-R4_MC09-2g08986	AUTOSOME	upregulated	no positive selection	ENOG41091CM	UDP-galactopyranose_mutase
MvSl-1064-A1-R4_MC09-2g08987	AUTOSOME	upregulated	no positive selection	ENOG41091BG	Malate_dehydrogenase
MvSl-1064-A1-R4_MC09-2g09030	AUTOSOME	upregulated	no positive selection	ENOG41091SN	Peptidase_dimerisation_domain
MvSl-1064-A1-R4_MC09-2g09034	AUTOSOME	upregulated	no positive selection	ENOG41093D7	ATP_synthase_D_chain,_mitochondrial_(ATP5H)
MvSl-1064-A1-R4_MC09-2g09035	AUTOSOME	upregulated	no positive selection	ENOG41091GZ	40S_ribosomal_protein_S1
MvSl-1064-A1-R4_MC09-2g09036	AUTOSOME	upregulated	no positive selection	ENOG41091MP	26S_proteasome_regulatory_subunit
MvSl-1064-A1-R4_MC09-2g09038	AUTOSOME	upregulated	no positive selection	ENOG410938C	NA
MvSl-1064-A1-R4_MC09-2g09039	AUTOSOME	upregulated	no positive selection	ENOG41090ZD	Transaldolase_is_important_for_the_balance_of_metabolites_in_the_pentose-phosphate_pathway_(By_similarity)
MvSl-1064-A1-R4_MC09-2g09042	AUTOSOME	upregulated	no positive selection	ENOG41093QM	Phosphatidylinositol_N-acetylglucosaminyltransferase
MvSl-1064-A1-R4_MC09-2g09048	AUTOSOME	upregulated	no positive selection	ENOG4109255	Deoxyhypusine_synthase
MvSl-1064-A1-R4_MC09-2g09053	AUTOSOME	upregulated	no positive selection	ENOG410915V	Fn3-like_domain_(DUF1034)
MvSl-1064-A1-R4_MC09-2g09056	AUTOSOME	upregulated	no positive selection	ENOG410943T	mitochondrial_54S_ribosomal_protein_YmL17_YmL30
MvSl-1064-A1-R4_MC09-2g09057	AUTOSOME	upregulated	no positive selection	ENOG41091BN	ubiE/COQ5_methyltransferase_family
MvSl-1064-A1-R4_MC09-2g09061	AUTOSOME	upregulated	no positive selection	ENOG410927F	DnaJ
MvSl-1064-A1-R4_MC09-2g09068	AUTOSOME	upregulated	no positive selection	ENOG41092MS	The_proteasome_is_a_multicatalytic_proteinase_complex_which_is_characterized_by_its_ability_to_cleave_peptides_with_Arg,_Phe,_Tyr,_Leu,_and_Glu_adjacent_to_the_leaving_group_at_neutral_or_slightly_basic_pH._The_proteasome_has_an_ATP-dependent_proteolytic_activity_(By_similarity)
MvSl-1064-A1-R4_MC09-2g09074	AUTOSOME	upregulated	no positive selection	ENOG41090Z1	Cytochrome_oxidase_assembly_protein
MvSl-1064-A1-R4_MC09-2g09081	AUTOSOME	upregulated	no positive selection	ENOG41093FE	60S_ribosomal_protein_L26
MvSl-1064-A1-R4_MC09-2g09082	AUTOSOME	upregulated	no positive selection	ENOG41094FT	NA
MvSl-1064-A1-R4_MC09-2g09084	AUTOSOME	upregulated	no positive selection	ENOG4109512	Nucleotidyl_transferase
MvSl-1064-A1-R4_MC09-2g09089	AUTOSOME	upregulated	no positive selection	ENOG41098TA	Major_Facilitator_Superfamily
MvSl-1064-A1-R4_MC09-2g09093	AUTOSOME	upregulated	no positive selection	ENOG41091RY	RNA_helicase
MvSl-1064-A1-R4_MC09-2g09094	AUTOSOME	upregulated	no positive selection	ENOG41091RY	RNA_helicase
MvSl-1064-A1-R4_MC09-2g09105	AUTOSOME	upregulated	no positive selection	ENOG41095J1	MRC1-like_domain
MvSl-1064-A1-R4_MC09-2g09106	AUTOSOME	upregulated	no positive selection	ENOG41095H8	NA
MvSl-1064-A1-R4_MC09-2g09107	AUTOSOME	upregulated	no positive selection	ENOG41093TR	Complex_1_protein_(LYR_family)
MvSl-1064-A1-R4_MC09-2g09113	AUTOSOME	upregulated	no positive selection	ENOG41091FD	aspartate-semialdehyde_dehydrogenase
MvSl-1064-A1-R4_MC09-2g09125	AUTOSOME	upregulated	no positive selection	ENOG41093N3	Spo7-like_protein
MvSl-1064-A1-R4_MC09-2g09126	AUTOSOME	upregulated	no positive selection	ENOG41093RA	RNA_recognition_motif._(a.k.a._RRM,_RBD,_or_RNP_domain)
MvSl-1064-A1-R4_MC09-2g09146	AUTOSOME	upregulated	no positive selection	ENOG410922D	Glycine_cleavage_system_P-protein
MvSl-1064-A1-R4_MC09-2g09153	AUTOSOME	upregulated	no positive selection	ENOG41093CY	Predicted_SAM-dependent_RNA_methyltransferase
MvSl-1064-A1-R4_MC09-2g09169	AUTOSOME	upregulated	no positive selection	ENOG41092KH	Eukaryotic_porin
MvSl-1064-A1-R4_MC09-2g09171	AUTOSOME	upregulated	no positive selection	ENOG41091YY	Aminotransferase_class-III
MvSl-1064-A1-R4_MC09-2g09179	AUTOSOME	upregulated	no positive selection	ENOG41094JW	Heavy-metal-associated_domain
MvSl-1064-A1-R4_MC09-2g09185	AUTOSOME	upregulated	no positive selection	NA	NA
MvSl-1064-A1-R4_MC09-2g09186	AUTOSOME	upregulated	no positive selection	ENOG41094MG	Surfeit_locus_protein_6
MvSl-1064-A1-R4_MC09-2g09188	AUTOSOME	upregulated	no positive selection	ENOG41091FQ	Small_GTPase_component_of_the_coat_protein_complex_II_(COPII)_which_promotes_the_formation_of_transport_vesicles_from_the_endoplasmic_reticulum_(ER)._The_coat_has_two_main_functions,_the_physical_deformation_of_the_endoplasmic_reticulum_membrane_into_vesicles_and_the_selection_of_cargo_molecules._SAR1_controls_the_coat_assembly_in_a_stepwise_manner._Activated_SAR1-GTP_binds_to_membranes_first_and…
MvSl-1064-A1-R4_MC09-2g09205	AUTOSOME	upregulated	no positive selection	ENOG41093TJ	60S_ribosomal_protein_L42
MvSl-1064-A1-R4_MC09-2g09217	AUTOSOME	upregulated	no positive selection	ENOG4109308	Eukaryotic_rRNA_processing_protein_EBP2
MvSl-1064-A1-R4_MC09-2g09218	AUTOSOME	upregulated	no positive selection	ENOG41094KN	Protein_of_unknown_function_(DUF2423)
MvSl-1064-A1-R4_MC09-2g09231	AUTOSOME	upregulated	no positive selection	ENOG410953X	Inherit_from_KOG:_UDP-GlcNAc_beta-Gal_beta-1,3-N-acetylglucosaminyltransferase
MvSl-1064-A1-R4_MC09-2g09232	AUTOSOME	upregulated	no positive selection	ENOG41092D3	Phosphate_transporter
MvSl-1064-A1-R4_MC09-2g09233	AUTOSOME	upregulated	no positive selection	ENOG41091ZZ	Glycosyl_hydrolases_family_31
MvSl-1064-A1-R4_MC09-2g09234	AUTOSOME	upregulated	no positive selection	ENOG41091VI	K04486_histidinol-phosphatase_(PHP_family)_EC_3.1.3.15
MvSl-1064-A1-R4_MC09-2g09254	AUTOSOME	upregulated	no positive selection	ENOG41094K8	NA
MvSl-1064-A1-R4_MC09-2g09294	AUTOSOME	upregulated	no positive selection	ENOG41091VT	Mycolic_acid_cyclopropane_synthetase
MvSl-1064-A1-R4_MC09-2g09296	AUTOSOME	upregulated	no positive selection	ENOG41092X8	coatomer
MvSl-1064-A1-R4_MC09-2g09299	AUTOSOME	upregulated	no positive selection	ENOG41094AC	WD_domain,_G-beta_repeat
MvSl-1064-A1-R4_MC09-2g09300	AUTOSOME	upregulated	no positive selection	ENOG41093VW	Sm
MvSl-1064-A1-R4_MC09-2g09315	AUTOSOME	upregulated	no positive selection	ENOG4109188	AIR_synthase_related_protein,_N-terminal_domain
MvSl-1064-A1-R4_MC09-2g09323	AUTOSOME	upregulated	no positive selection	ENOG41091R3	K00311_electron-transferring-flavoprotein_dehydrogenase_EC_1.5.5.1
MvSl-1064-A1-R4_MC09-2g09346	AUTOSOME	upregulated	no positive selection	ENOG41093V3	OTU-like_cysteine_protease
MvSl-1064-A1-R4_MC09-2g09347	AUTOSOME	upregulated	no positive selection	ENOG410956F	Inherit_from_fuNOG:_RING_finger_domain_protein_(Znf1)
MvSl-1064-A1-R4_MC09-2g09354	AUTOSOME	upregulated	no positive selection	ENOG41097E6	Queuine_tRNA-ribosyltransferase
MvSl-1064-A1-R4_MC09-2g09370	AUTOSOME	upregulated	no positive selection	ENOG41091MU	Seryl-tRNA_synthetase_N-terminal_domain
MvSl-1064-A1-R4_MC09-2g09381	AUTOSOME	upregulated	no positive selection	ENOG41091IQ	WD_domain,_G-beta_repeat
MvSl-1064-A1-R4_MC09-2g09382	AUTOSOME	upregulated	no positive selection	ENOG41092DZ	WD_domain,_G-beta_repeat
MvSl-1064-A1-R4_MC09-2g09383	AUTOSOME	upregulated	no positive selection	ENOG410934Z	S4_domain
MvSl-1064-A1-R4_MC09-2g09391	AUTOSOME	upregulated	no positive selection	ENOG41093JS	Ribosomal_protein_L35
MvSl-1064-A1-R4_MC09-2g09392	AUTOSOME	upregulated	no positive selection	ENOG41091VE	Pfam:Complex1_24kDa
MvSl-1064-A1-R4_MC09-2g09399	AUTOSOME	upregulated	no positive selection	ENOG41092C8	C-terminal_domain_of_1-Cys_peroxiredoxin
MvSl-1064-A1-R4_MC09-2g09404	AUTOSOME	upregulated	no positive selection	ENOG41091NB	The_proteasome_is_a_multicatalytic_proteinase_complex_which_is_characterized_by_its_ability_to_cleave_peptides_with_Arg,_Phe,_Tyr,_Leu,_and_Glu_adjacent_to_the_leaving_group_at_neutral_or_slightly_basic_pH._The_proteasome_has_an_ATP-dependent_proteolytic_activity_(By_similarity)
MvSl-1064-A1-R4_MC09-2g09414	AUTOSOME	upregulated	no positive selection	ENOG41095X8	Sof1-like_domain
MvSl-1064-A1-R4_MC09-2g09420	AUTOSOME	upregulated	no positive selection	ENOG41090Z6	ZIP_Zinc_transporter
MvSl-1064-A1-R4_MC09-2g09422	AUTOSOME	upregulated	no positive selection	ENOG410944M	Inherit_from_opiNOG:_haloacid_dehalogenase-like_hydrolase_domain_containing_2
MvSl-1064-A1-R4_MC09-2g09423	AUTOSOME	upregulated	no positive selection	ENOG41094J8	NA
MvSl-1064-A1-R4_MC09-2g09430	AUTOSOME	upregulated	no positive selection	ENOG41095YI	Yqey-like_protein
MvSl-1064-A1-R4_MC09-2g09432	AUTOSOME	upregulated	no positive selection	ENOG410936R	NADPH-dependent_FMN_reductase
MvSl-1064-A1-R4_MC09-2g09447	AUTOSOME	upregulated	no positive selection	ENOG41091BI	Isocitrate/isopropylmalate_dehydrogenase
MvSl-1064-A1-R4_MC09-2g09449	AUTOSOME	upregulated	no positive selection	ENOG410921W	Quinolinate_phosphoribosyl_transferase,_C-terminal_domain
MvSl-1064-A1-R4_MC09-2g09464	AUTOSOME	upregulated	no positive selection	ENOG410952K	Sugar_(and_other)_transporter
MvSl-1064-A1-R4_MC09-2g09471	AUTOSOME	upregulated	no positive selection	ENOG410998E	SWI_SNF_related,_matrix_associated,_actin_dependent_regulator_of_chromatin,_subfamily_a,_member_3
MvSl-1064-A1-R4_MC09-2g09493	AUTOSOME	upregulated	no positive selection	ENOG410928Y	ACTIN
MvSl-1064-A1-R4_MC09-2g09511	AUTOSOME	upregulated	no positive selection	ENOG41095R2	Spo12_family
MvSl-1064-A1-R4_MC09-2g09521	AUTOSOME	upregulated	no positive selection	ENOG41091UB	Heat_shock_protein
MvSl-1064-A1-R4_MC09-2g09522	AUTOSOME	upregulated	no positive selection	ENOG41093NV	Chaperonin_10_Kd_subunit
MvSl-1064-A1-R4_MC09-2g09551	AUTOSOME	upregulated	no positive selection	ENOG410921T	CDC37_C
MvSl-1064-A1-R4_MC09-2g09553	AUTOSOME	upregulated	no positive selection	ENOG41091ZI	The_proteasome_is_a_multicatalytic_proteinase_complex_which_is_characterized_by_its_ability_to_cleave_peptides_with_Arg,_Phe,_Tyr,_Leu,_and_Glu_adjacent_to_the_leaving_group_at_neutral_or_slightly_basic_pH._The_proteasome_has_an_ATP-dependent_proteolytic_activity_(By_similarity)
MvSl-1064-A1-R4_MC09-2g09554	AUTOSOME	upregulated	no positive selection	ENOG41094SQ	IGR_protein_motif
MvSl-1064-A1-R4_MC09-2g09558	AUTOSOME	upregulated	no positive selection	ENOG41093XA	NADH_ubiquinone_oxidoreductase_subunit_NDUFA12
MvSl-1064-A1-R4_MC09-2g09563	AUTOSOME	upregulated	no positive selection	ENOG410920R	Required_for_proper_27S_pre-rRNA_processing_and_60S_ribosome_subunit_assembly_(By_similarity)
MvSl-1064-A1-R4_MC09-2g09564	AUTOSOME	upregulated	no positive selection	ENOG41091V7	The_proteasome_is_a_multicatalytic_proteinase_complex_which_is_characterized_by_its_ability_to_cleave_peptides_with_Arg,_Phe,_Tyr,_Leu,_and_Glu_adjacent_to_the_leaving_group_at_neutral_or_slightly_basic_pH._The_proteasome_has_an_ATP-dependent_proteolytic_activity_(By_similarity)
MvSl-1064-A1-R4_MC10-1g09602	AUTOSOME	upregulated	no positive selection	ENOG41091HQ	mitochondrial_processing_peptidase_beta_subunit
MvSl-1064-A1-R4_MC10-1g09603	AUTOSOME	upregulated	no positive selection	ENOG41091R7	Nuclear_segregation_protein_Bfr1
MvSl-1064-A1-R4_MC10-1g09621	AUTOSOME	upregulated	no positive selection	ENOG41091CZ	Cobalamin-independent_synthase,_Catalytic_domain
MvSl-1064-A1-R4_MC10-1g09636	AUTOSOME	upregulated	no positive selection	ENOG4109229	Component_of_the_eukaryotic_translation_initiation_factor_3_(eIF-3)_complex,_which_is_involved_in_protein_synthesis_and,_together_with_other_initiation_factors,_stimulates_binding_of_mRNA_and_methionyl-tRNAi_to_the_40S_ribosome_(By_similarity)
MvSl-1064-A1-R4_MC10-1g09642	AUTOSOME	upregulated	no positive selection	ENOG41092VT	LCCL_domain
MvSl-1064-A1-R4_MC10-1g09646	AUTOSOME	upregulated	no positive selection	ENOG41093K3	Protein_of_unknown_function_(DUF410)
MvSl-1064-A1-R4_MC10-1g09658	AUTOSOME	upregulated	no positive selection	ENOG41092TN	ATP_synthase_subunit_C
MvSl-1064-A1-R4_MC10-1g09665	AUTOSOME	upregulated	no positive selection	ENOG41091UX	adp-ribosylation_factor
MvSl-1064-A1-R4_MC10-1g09666	AUTOSOME	upregulated	no positive selection	ENOG410929Y	Inherit_from_fuNOG:_conserved_leucine-rich_repeat_protein
MvSl-1064-A1-R4_MC10-1g09667	AUTOSOME	upregulated	no positive selection	ENOG410948A	Mitochondrial_F1-F0_ATP_synthase_subunit_F_of_fungi
MvSl-1064-A1-R4_MC10-1g09675	AUTOSOME	upregulated	no positive selection	NA	NA
MvSl-1064-A1-R4_MC10-1g09685	AUTOSOME	upregulated	no positive selection	ENOG41096XI	NA
MvSl-1064-A1-R4_MC10-1g09689	AUTOSOME	upregulated	no positive selection	ENOG41091YX	ENTH_domain
MvSl-1064-A1-R4_MC10-1g09707	AUTOSOME	upregulated	no positive selection	ENOG41096Z9	Deuterolysin_metalloprotease_(M35)_family
MvSl-1064-A1-R4_MC10-1g09714	AUTOSOME	upregulated	no positive selection	ENOG41091EH	SPFH_domain_/_Band_7_family
MvSl-1064-A1-R4_MC10-1g09717	AUTOSOME	upregulated	no positive selection	ENOG410945X	NA
MvSl-1064-A1-R4_MC10-1g09738	AUTOSOME	upregulated	no positive selection	ENOG41093EN	ribosomal_protein_s20
MvSl-1064-A1-R4_MC10-1g09742	AUTOSOME	upregulated	no positive selection	ENOG410929B	Golgi_transport_complex_subunit_5
MvSl-1064-A1-R4_MC10-1g09751	AUTOSOME	upregulated	no positive selection	ENOG41093MG	nucleolar_protein_family_A_member_2
MvSl-1064-A1-R4_MC10-1g09753	AUTOSOME	upregulated	no positive selection	ENOG41091Z0	Translation_initiation_factor
MvSl-1064-A1-R4_MC10-1g09768	AUTOSOME	upregulated	no positive selection	ENOG41092GK	60s_ribosomal_protein
MvSl-1064-A1-R4_MC10-1g09791	AUTOSOME	upregulated	no positive selection	ENOG41093X0	Peptidyl-prolyl_cis-trans_isomerase
MvSl-1064-A1-R4_MC10-1g09792	AUTOSOME	upregulated	no positive selection	ENOG41090ZR	ATP-grasp_domain
MvSl-1064-A1-R4_MC10-1g09795	AUTOSOME	upregulated	no positive selection	ENOG41092KA	Fatty_acid_desaturase
MvSl-1064-A1-R4_MC10-1g09799	AUTOSOME	upregulated	no positive selection	ENOG41091Z5	Uncharacterised_protein_family_(UPF0160)
MvSl-1064-A1-R4_MC10-2g09881	AUTOSOME	upregulated	no positive selection	ENOG41092IP	Dehydrogenase_E1_component
MvSl-1064-A1-R4_MC10-2g09883	AUTOSOME	upregulated	no positive selection	ENOG41091X2	t-complex_protein_1
MvSl-1064-A1-R4_MC10-2g09884	AUTOSOME	upregulated	no positive selection	ENOG410922R	phosphoribosylaminoimidazole_carboxylase
MvSl-1064-A1-R4_MC10-2g09903	AUTOSOME	upregulated	no positive selection	ENOG41090Z8	Pre-mRNA-processing_protein_45
MvSl-1064-A1-R4_MC10-2g09905	AUTOSOME	upregulated	no positive selection	ENOG41094AE	60S_ribosomal_protein_L36
MvSl-1064-A1-R4_MC10-2g09906	AUTOSOME	upregulated	no positive selection	ENOG410923M	60S_ribosomal_protein_L6
MvSl-1064-A1-R4_MC10-2g09917	AUTOSOME	upregulated	no positive selection	ENOG41091S3	Tubulin_is_the_major_constituent_of_microtubules._It_binds_two_moles_of_GTP,_one_at_an_exchangeable_site_on_the_beta_chain_and_one_at_a_non-exchangeable_site_on_the_alpha_chain_(By_similarity)
MvSl-1064-A1-R4_MC10-2g09928	AUTOSOME	upregulated	no positive selection	ENOG41092JC	Elongation_factor_1_gamma,_conserved_domain
MvSl-1064-A1-R4_MC10-2g09934	AUTOSOME	upregulated	no positive selection	ENOG410916G	ATP_phosphoribosyltransferase
MvSl-1064-A1-R4_MC10-2g09954	AUTOSOME	upregulated	no positive selection	ENOG410913T	DSHCT_(NUC185)_domain
MvSl-1064-A1-R4_MC10-2g09959	AUTOSOME	upregulated	no positive selection	ENOG41094EQ	BIR
MvSl-1064-A1-R4_MC10-2g09969	AUTOSOME	upregulated	no positive selection	ENOG410916S	Tbc1_domain_family_protein
MvSl-1064-A1-R4_MC10-2g09978	AUTOSOME	upregulated	no positive selection	ENOG410922Y	DALR_2
MvSl-1064-A1-R4_MC10-2g09985	AUTOSOME	upregulated	no positive selection	ENOG41093DH	CTNS
MvSl-1064-A1-R4_MC10-2g09986	AUTOSOME	upregulated	no positive selection	ENOG41093BI	Inherit_from_fuNOG:_short-chain_dehydrogenase_reductase
MvSl-1064-A1-R4_MC10-2g09990	AUTOSOME	upregulated	no positive selection	ENOG41093FQ	ribosomal_protein
MvSl-1064-A1-R4_MC10-2g09993	AUTOSOME	upregulated	no positive selection	ENOG41094AA	MAS20_protein_import_receptor
MvSl-1064-A1-R4_MC10-2g10000	AUTOSOME	upregulated	no positive selection	ENOG41093UB	U3_small_nucleolar_RNA-associated_protein_6
MvSl-1064-A1-R4_MC10-2g10006	AUTOSOME	upregulated	no positive selection	ENOG41091CX	protein_beta_subunit
MvSl-1064-A1-R4_MC10-2g10007	AUTOSOME	upregulated	no positive selection	ENOG41092RX	60S_ribosomal_protein_L12
MvSl-1064-A1-R4_MC10-2g10009	AUTOSOME	upregulated	no positive selection	ENOG4109320	Pfam:PGAM
MvSl-1064-A1-R4_MC10-2g10025	AUTOSOME	upregulated	no positive selection	ENOG410945H	Protein_of_unknown_function_(DUF3759)
MvSl-1064-A1-R4_MC10-2g10032	AUTOSOME	upregulated	no positive selection	ENOG41091GX	AUR_protein_kinase
MvSl-1064-A1-R4_MC10-2g10034	AUTOSOME	upregulated	no positive selection	ENOG41093BF	Cytochrome_c/c1_heme_lyase
MvSl-1064-A1-R4_MC10-2g10042	AUTOSOME	upregulated	no positive selection	ENOG41096PA	NA
MvSl-1064-A1-R4_MC10-2g10043	AUTOSOME	upregulated	no positive selection	NA	NA
MvSl-1064-A1-R4_MC10-2g10045	AUTOSOME	upregulated	no positive selection	ENOG41092D5	ABC_transporter_transmembrane_region
MvSl-1064-A1-R4_MC10-2g10062	AUTOSOME	upregulated	no positive selection	ENOG41097SZ	MYND_finger
MvSl-1064-A1-R4_MC10-2g10071	AUTOSOME	upregulated	no positive selection	ENOG41093YA	Mitochondrial_intermembrane_chaperone_that_participates_in_the_import_and_insertion_of_multi-pass_transmembrane_proteins_into_the_mitochondrial_inner_membrane._Also_required_for_the_transfer_of_beta-barrel_precursors_from_the_TOM_complex_to_the_sorting_and_assembly_machinery_(SAM_complex)_of_the_outer_membrane._Acts_as_a_chaperone-like_protein_that_protects_the_hydrophobic_precursors_from_aggrega…
MvSl-1064-A1-R4_MC10-2g10072	AUTOSOME	upregulated	no positive selection	ENOG41091HR	Binds_to_the_60S_ribosomal_subunit_and_prevents_its_association_with_the_40S_ribosomal_subunit_to_form_the_80S_initiation_complex_in_the_cytoplasm._Is_also_involved_in_ribosome_biogenesis._Associates_with_pre-60S_subunits_in_the_nucleus_and_is_involved_in_its_nuclear_export_(By_similarity)
MvSl-1064-A1-R4_MC10-2g10080	AUTOSOME	upregulated	no positive selection	ENOG41092S3	Elongation_factor
MvSl-1064-A1-R4_MC10-2g10083	AUTOSOME	upregulated	no positive selection	ENOG41091KS	homoserine_dehydrogenase
MvSl-1064-A1-R4_MC10-2g10086	AUTOSOME	upregulated	no positive selection	ENOG410942N	DASH_complex_subunit_Dam1
MvSl-1064-A1-R4_MC10-2g10088	AUTOSOME	upregulated	no positive selection	ENOG41097YT	CRAL_TRIO_N
MvSl-1064-A1-R4_MC10-2g10091	AUTOSOME	upregulated	no positive selection	ENOG410937C	ETC_complex_I_subunit_conserved_region
MvSl-1064-A1-R4_MC10-2g10098	AUTOSOME	upregulated	no positive selection	ENOG41091HJ	Zinc-binding_dehydrogenase
MvSl-1064-A1-R4_MC10-2g10102	AUTOSOME	upregulated	no positive selection	ENOG41091FR	Mannosyl_oligosaccharide_glucosidase
MvSl-1064-A1-R4_MC10-2g10108	AUTOSOME	upregulated	no positive selection	ENOG410952D	T-complex_protein_11
MvSl-1064-A1-R4_MC10-2g10112	AUTOSOME	upregulated	no positive selection	ENOG410955J	Inherit_from_opiNOG:_alanyl-tRNA_synthetase_domain_containing_1
MvSl-1064-A1-R4_MC10-2g10127	AUTOSOME	upregulated	no positive selection	ENOG410934F	Regulator_of_chromosome_condensation_(RCC1)_repeat
MvSl-1064-A1-R4_MC11g10158	AUTOSOME	upregulated	no positive selection	ENOG4109365	Involved_in_cytoplasm_to_vacuole_transport_(Cvt)_and_autophagy_vesicles_formation._May_be_required_for_ATG8_association_to_the_vesicle_membranes_(By_similarity)
MvSl-1064-A1-R4_MC11g10159	AUTOSOME	upregulated	no positive selection	ENOG41091TV	UTP--glucose-1-phosphate_uridylyltransferase
MvSl-1064-A1-R4_MC11g10163	AUTOSOME	upregulated	no positive selection	ENOG41094BM	PAC2_family
MvSl-1064-A1-R4_MC11g10209	AUTOSOME	upregulated	no positive selection	ENOG410939M	FAD_dependent_oxidoreductase
MvSl-1064-A1-R4_MC11g10233	AUTOSOME	upregulated	no positive selection	ENOG41093D0	40S_ribosomal_protein_S26
MvSl-1064-A1-R4_MC11g10237	AUTOSOME	upregulated	no positive selection	ENOG41092RM	Inherit_from_fuNOG:_DUF218_domain_protein
MvSl-1064-A1-R4_MC11g10252	AUTOSOME	upregulated	no positive selection	ENOG410920P	Eukaryotic_and_archaeal_DNA_primase,_large_subunit
MvSl-1064-A1-R4_MC11g10255	AUTOSOME	upregulated	no positive selection	ENOG41098ZH	NA
MvSl-1064-A1-R4_MC11g10259	AUTOSOME	upregulated	no positive selection	ENOG41091M0	ATP-dependent_RNA_helicase_required_for_60S_ribosomal_subunit_synthesis._Involved_in_efficient_pre-rRNA_processing,_predominantly_at_site_A3,_which_is_necessary_for_the_normal_formation_of_25S_and_5.8S_rRNAs_(By_similarity)
MvSl-1064-A1-R4_MC11g10270	AUTOSOME	upregulated	no positive selection	ENOG410945M	e3_binding_domain
MvSl-1064-A1-R4_MC11g10278	AUTOSOME	upregulated	no positive selection	ENOG41092PR	Oxidoreductase_FAD-binding_domain
MvSl-1064-A1-R4_MC11g10279	AUTOSOME	upregulated	no positive selection	ENOG41091ES	Cyclin-dependent_protein_kinase
MvSl-1064-A1-R4_MC11g10280	AUTOSOME	upregulated	no positive selection	ENOG4109123	Myo-inositol-1-phosphate_synthase
MvSl-1064-A1-R4_MC11g10291	AUTOSOME	upregulated	no positive selection	ENOG410935R	Mitochondrial_ATP_synthase_B_chain_precursor_(ATP-synt_B)
MvSl-1064-A1-R4_MC11g10309	AUTOSOME	upregulated	no positive selection	ENOG41091AC	6-phosphogluconolactonase_(EC_3.1.1.31)
MvSl-1064-A1-R4_MC11g10323	AUTOSOME	upregulated	no positive selection	ENOG41093AY	PUA_domain
MvSl-1064-A1-R4_MC11g10324	AUTOSOME	upregulated	no positive selection	ENOG41094QF	Inherit_from_KOG:_mitochondrial_import_inner_membrane,_translocase_subunit
MvSl-1064-A1-R4_MC11g10328	AUTOSOME	upregulated	no positive selection	ENOG41091JN	ATPase_required_for_the_post-translational_delivery_of_tail-anchored_(TA)_proteins_to_the_endoplasmic_reticulum._Recognizes_and_selectively_binds_the_transmembrane_domain_of_TA_proteins_in_the_cytosol._This_complex_then_targets_to_the_endoplasmic_reticulum_by_membrane-bound_receptors,_where_the_tail-_anchored_protein_is_released_for_insertion._This_process_is_regulated_by_ATP_binding_and_hydrolys…
MvSl-1064-A1-R4_MC11g10329	AUTOSOME	upregulated	no positive selection	ENOG410947V	Protein_of_unknown_function_(DUF3128)
MvSl-1064-A1-R4_MC11g10339	AUTOSOME	upregulated	no positive selection	ENOG41097B0	NA
MvSl-1064-A1-R4_MC11g10340	AUTOSOME	upregulated	no positive selection	NA	NA
MvSl-1064-A1-R4_MC11g10341	AUTOSOME	upregulated	no positive selection	ENOG4109415	NA
MvSl-1064-A1-R4_MC11g10364	AUTOSOME	upregulated	no positive selection	ENOG41092HZ	tRNA_synthetases_class_I_(W_and_Y)
MvSl-1064-A1-R4_MC11g10367	AUTOSOME	upregulated	no positive selection	ENOG41091IZ	Dip2/Utp12_Family
MvSl-1064-A1-R4_MC11g10371	AUTOSOME	upregulated	no positive selection	ENOG41091B2	K16945_cell_division_control_protein_11
MvSl-1064-A1-R4_MC11g10374	AUTOSOME	upregulated	no positive selection	ENOG41099BD	RNA_recognition_motif._(a.k.a._RRM,_RBD,_or_RNP_domain)
MvSl-1064-A1-R4_MC11g10376	AUTOSOME	upregulated	no positive selection	ENOG410960S	SUR7/PalI_family
MvSl-1064-A1-R4_MC11g10378	AUTOSOME	upregulated	no positive selection	ENOG41093WJ	Rhodanese-like_domain
MvSl-1064-A1-R4_MC11g10383	AUTOSOME	upregulated	no positive selection	ENOG410950T	NA
MvSl-1064-A1-R4_MC11g10389	AUTOSOME	upregulated	no positive selection	ENOG41094D1	FHA_domain
MvSl-1064-A1-R4_MC11g10404	AUTOSOME	upregulated	no positive selection	ENOG41093EH	Essential_component_of_the_PAM_complex,_a_complex_required_for_the_translocation_of_transit_peptide-containing_proteins_from_the_inner_membrane_into_the_mitochondrial_matrix_in_an_ATP-dependent_manner_(By_similarity)
MvSl-1064-A1-R4_MC11g10409	AUTOSOME	upregulated	no positive selection	ENOG41095KY	NA
MvSl-1064-A1-R4_MC11g10412	AUTOSOME	upregulated	no positive selection	ENOG41095A0	NA
MvSl-1064-A1-R4_MC11g10427	AUTOSOME	upregulated	no positive selection	ENOG410929F	chitin_deacetylase-like_mannoprotein_MP98
MvSl-1064-A1-R4_MC11g10428	AUTOSOME	upregulated	no positive selection	ENOG41091B6	chitin_deacetylase
MvSl-1064-A1-R4_MC11g10430	AUTOSOME	upregulated	no positive selection	ENOG41095KJ	Ctr_copper_transporter_family
MvSl-1064-A1-R4_MC11g10431	AUTOSOME	upregulated	no positive selection	ENOG410935I	Ferric_reductase_like_transmembrane_component
MvSl-1064-A1-R4_MC11g10432	AUTOSOME	upregulated	no positive selection	ENOG4109420	NA
MvSl-1064-A1-R4_MC11g10433	AUTOSOME	upregulated	no positive selection	ENOG41092J7	Required_for_the_assembly_and_or_stability_of_the_40S_ribosomal_subunit._Required_for_the_processing_of_the_20S_rRNA-_precursor_to_mature_18S_rRNA_in_a_late_step_of_the_maturation_of_40S_ribosomal_subunits_(By_similarity)
MvSl-1064-A1-R4_MC11g10444	AUTOSOME	upregulated	no positive selection	NA	NA
MvSl-1064-A1-R4_MC11g10446	AUTOSOME	upregulated	no positive selection	ENOG41091Y2	WD_domain,_G-beta_repeat
MvSl-1064-A1-R4_MC11g10449	AUTOSOME	upregulated	no positive selection	NA	NA
MvSl-1064-A1-R4_MC11g10452	AUTOSOME	upregulated	no positive selection	ENOG41094MZ	Acts_as_a_component_of_the_essential_kinetochore-_associated_NDC80_complex,_which_is_required_for_chromosome_segregation_and_spindle_checkpoint_activity_(By_similarity)
MvSl-1064-A1-R4_MC11g10470	AUTOSOME	upregulated	no positive selection	ENOG41095HK	Antibiotic_biosynthesis_monooxygenase
MvSl-1064-A1-R4_MC11g10485	AUTOSOME	upregulated	no positive selection	ENOG41094SH	NA
MvSl-1064-A1-R4_MC11g10516	AUTOSOME	upregulated	no positive selection	NA	NA
MvSl-1064-A1-R4_MC11g10523	AUTOSOME	upregulated	no positive selection	ENOG41094KM	NA
MvSl-1064-A1-R4_MC11g10525	AUTOSOME	upregulated	no positive selection	ENOG41091ZA	Porphobilinogen_deaminase,_dipyromethane_cofactor_binding_domain
MvSl-1064-A1-R4_MC11g10526	AUTOSOME	upregulated	no positive selection	ENOG410926T	60S_ribosomal_protein_L2
MvSl-1064-A1-R4_MC11g10551	AUTOSOME	upregulated	no positive selection	ENOG410949H	40S_ribosomal_protein_S29
MvSl-1064-A1-R4_MC11g10552	AUTOSOME	upregulated	no positive selection	ENOG41092HJ	40S_ribosomal_protein_S8
MvSl-1064-A1-R4_MC11g10585	AUTOSOME	upregulated	no positive selection	NA	NA
MvSl-1064-A1-R4_MC11g10593	AUTOSOME	upregulated	no positive selection	ENOG41092I9	Integral_membrane_protein_sed5
MvSl-1064-A1-R4_MC11g10606	AUTOSOME	upregulated	no positive selection	ENOG41091PF	Prenyltransferase_and_squalene_oxidase_repeat
MvSl-1064-A1-R4_MC11g10633	AUTOSOME	upregulated	no positive selection	ENOG41092CT	SPFH_domain_/_Band_7_family
MvSl-1064-A1-R4_MC11g10640	AUTOSOME	upregulated	no positive selection	ENOG41094R4	Ydr279p_protein_family_(RNase_H2_complex_component)
MvSl-1064-A1-R4_MC11g10641	AUTOSOME	upregulated	no positive selection	ENOG41094X1	argonaute-like_protein
MvSl-1064-A1-R4_MC11g10665	AUTOSOME	upregulated	no positive selection	ENOG41094ME	NA
MvSl-1064-A1-R4_MC11g10670	AUTOSOME	upregulated	no positive selection	ENOG41092WX	Major_Facilitator_Superfamily
MvSl-1064-A1-R4_MC11g10676	AUTOSOME	upregulated	no positive selection	ENOG41092SF	Ubiquitin_carboxyl-terminal_hydrolase,_family_1
MvSl-1064-A1-R4_MC11g10678	AUTOSOME	upregulated	no positive selection	ENOG410940C	Pre-rRNA-processing_protein_TSR2
MvSl-1064-A1-R4_MC11g10679	AUTOSOME	upregulated	no positive selection	ENOG41092Y9	Essential_core_component_of_the_TIM22_complex,_a_complex_that_mediates_the_import_and_insertion_of_multi-pass_transmembrane_proteins_into_the_mitochondrial_inner_membrane._In_the_TIM22_complex,_it_constitutes_the_voltage-activated_and_signal-gated_channel._Forms_a_twin-pore_translocase_that_uses_the_membrane_potential_as_external_driving_force_in_2_voltage-dependent_steps_(By_similarity)
MvSl-1064-A1-R4_MC11g10680	AUTOSOME	upregulated	no positive selection	ENOG41094XZ	NADH:flavin_oxidoreductase_/_NADH_oxidase_family
MvSl-1064-A1-R4_MC11g10693	AUTOSOME	upregulated	no positive selection	ENOG41092IF	Required_for_small_ribosomal_subunit_(SSU)_synthesis._Has_a_role_in_the_processing_of_early_nucleolar_and_late_cytoplasmic_pre-RNA_species_(By_similarity)
MvSl-1064-A1-R4_MC11g10698	AUTOSOME	upregulated	no positive selection	NA	NA
MvSl-1064-A1-R4_MC11g10705	AUTOSOME	upregulated	no positive selection	ENOG410917B	branched-chain-amino-acid_aminotransferase
MvSl-1064-A1-R4_MC11g10712	AUTOSOME	upregulated	no positive selection	ENOG410928M	Binds_the_poly(A)_tail_of_mRNA._Appears_to_be_an_important_mediator_of_the_multiple_roles_of_the_poly(A)_tail_in_mRNA_biogenesis,_stability_and_translation._In_the_nucleus,_involved_in_both_mRNA_cleavage_and_polyadenylation._Is_also_required_for_efficient_mRNA_export_to_the_cytoplasm._Acts_in_concert_with_a_poly(A)-specific_nuclease_(PAN)_to_affect_poly(A)_tail_shortening,_which_may_occur_concomi…
MvSl-1064-A1-R4_MC11g10723	AUTOSOME	upregulated	no positive selection	ENOG41091HS	TATA-binding_protein_interacting_(TIP20)
MvSl-1064-A1-R4_MC12g10752	AUTOSOME	upregulated	no positive selection	ENOG4109271	The_coatomer_is_a_cytosolic_protein_complex_that_binds_to_dilysine_motifs_and_reversibly_associates_with_Golgi_non-_clathrin-coated_vesicles,_which_further_mediate_biosynthetic_protein_transport_from_the_ER,_via_the_Golgi_up_to_the_trans_Golgi_network._Coatomer_complex_is_required_for_budding_from_Golgi_membranes,_and_is_essential_for_the_retrograde_Golgi-to-ER_transport_of_dilysine-tagged_protei…
MvSl-1064-A1-R4_MC12g10770	AUTOSOME	upregulated	no positive selection	ENOG41091GA	Pyrroline-5-carboxylate_reductase
MvSl-1064-A1-R4_MC12g10775	AUTOSOME	upregulated	no positive selection	ENOG41092QX	Inherit_from_fuNOG:_thiamin_pyrophosphokinase-related_protein
MvSl-1064-A1-R4_MC12g10782	AUTOSOME	upregulated	no positive selection	NA	NA
MvSl-1064-A1-R4_MC12g10796	AUTOSOME	upregulated	no positive selection	ENOG41094A7	Coatomer_epsilon_subunit
MvSl-1064-A1-R4_MC12g10806	AUTOSOME	upregulated	no positive selection	ENOG4109201	RecF/RecN/SMC_N_terminal_domain
MvSl-1064-A1-R4_MC12g10813	AUTOSOME	upregulated	no positive selection	ENOG410947W	Inherit_from_opiNOG:_Sister_chromatid_cohesion
MvSl-1064-A1-R4_MC12g10833	AUTOSOME	upregulated	no positive selection	ENOG41091S1	Chitin_synthase_2
MvSl-1064-A1-R4_MC12g10846	AUTOSOME	upregulated	no positive selection	ENOG41097UT	F/Y_rich_C-terminus
MvSl-1064-A1-R4_MC12g10852	AUTOSOME	upregulated	no positive selection	ENOG4109286	Chorismate_synthase
MvSl-1064-A1-R4_MC12g10859	AUTOSOME	upregulated	no positive selection	ENOG41093FV	Pfam:Muc_lac_enz
MvSl-1064-A1-R4_MC12g10888	AUTOSOME	upregulated	no positive selection	ENOG41091CE	CactinC_cactus
MvSl-1064-A1-R4_MC12g10898	AUTOSOME	upregulated	no positive selection	ENOG4109222	PINT
MvSl-1064-A1-R4_MC12g10901	AUTOSOME	upregulated	no positive selection	ENOG4109275	NUC130/3NT_domain
MvSl-1064-A1-R4_MC12g10902	AUTOSOME	upregulated	no positive selection	ENOG41091NK	Replication_factor_C_C-terminal_domain
MvSl-1064-A1-R4_MC12g10903	AUTOSOME	upregulated	no positive selection	ENOG41091KP	e3_binding_domain
MvSl-1064-A1-R4_MC12g10907	AUTOSOME	upregulated	no positive selection	ENOG41094RP	NA
MvSl-1064-A1-R4_MC12g10911	AUTOSOME	upregulated	no positive selection	ENOG410910I	glutamine_synthetase
MvSl-1064-A1-R4_MC12g10913	AUTOSOME	upregulated	no positive selection	ENOG41093MP	Inherit_from_fuNOG:_Tetratricopeptide_repeat_protein_1
MvSl-1064-A1-R4_MC12g10918	AUTOSOME	upregulated	no positive selection	ENOG41092WY	Zinc_finger,_C2H2_type
MvSl-1064-A1-R4_MC12g10924	AUTOSOME	upregulated	no positive selection	ENOG4109301	Mitochondrial_carrier_protein
MvSl-1064-A1-R4_MC12g10926	AUTOSOME	upregulated	no positive selection	NA	NA
MvSl-1064-A1-R4_MC12g10932	AUTOSOME	upregulated	no positive selection	ENOG41092EK	Component_of_the_eukaryotic_translation_initiation_factor_3_(eIF-3)_complex,_which_is_involved_in_protein_synthesis_and,_together_with_other_initiation_factors,_stimulates_binding_of_mRNA_and_methionyl-tRNAi_to_the_40S_ribosome_(By_similarity)
MvSl-1064-A1-R4_MC12g10939	AUTOSOME	upregulated	no positive selection	ENOG41091Y8	Mitochondrial_protein_Pet127
MvSl-1064-A1-R4_MC12g10940	AUTOSOME	upregulated	no positive selection	ENOG41092FX	Coproporphyrinogen_III_oxidase
MvSl-1064-A1-R4_MC12g10942	AUTOSOME	upregulated	no positive selection	ENOG410913H	short_chain_dehydrogenase
MvSl-1064-A1-R4_MC12g10945	AUTOSOME	upregulated	no positive selection	ENOG41092XK	NA
MvSl-1064-A1-R4_MC12g10949	AUTOSOME	upregulated	no positive selection	ENOG41094AR	40S_ribosomal_protein_S28
MvSl-1064-A1-R4_MC12g10950	AUTOSOME	upregulated	no positive selection	ENOG41091UG	40s_ribosomal_protein
MvSl-1064-A1-R4_MC12g10958	AUTOSOME	upregulated	no positive selection	ENOG4109566	Glycoside_hydrolase_family_18_protein
MvSl-1064-A1-R4_MC12g10962	AUTOSOME	upregulated	no positive selection	ENOG41092CH	Glycosyl_transferase_family_8
MvSl-1064-A1-R4_MC12g10971	AUTOSOME	upregulated	no positive selection	ENOG410918B	Fumarase_C_C-terminus
MvSl-1064-A1-R4_MC12g10977	AUTOSOME	upregulated	no positive selection	ENOG41091QC	PPIases_accelerate_the_folding_of_proteins._It_catalyzes_the_cis-trans_isomerization_of_proline_imidic_peptide_bonds_in_oligopeptides_(By_similarity)
MvSl-1064-A1-R4_MC12g10979	AUTOSOME	upregulated	no positive selection	ENOG41094YU	PhoD-like_phosphatase
MvSl-1064-A1-R4_MC12g10983	AUTOSOME	upregulated	no positive selection	ENOG41094FH	Cytochrome_c_oxidase_biogenesis_protein_Cmc1_like
MvSl-1064-A1-R4_MC12g10992	AUTOSOME	upregulated	no positive selection	ENOG41092EE	NADH-ubiquinone_oxidoreductase_51_kDa_subunit
MvSl-1064-A1-R4_MC12g10994	AUTOSOME	upregulated	no positive selection	ENOG41098J0	Glyceraldehyde_3-phosphate_dehydrogenase,_C-terminal_domain
MvSl-1064-A1-R4_MC12g10996	AUTOSOME	upregulated	no positive selection	ENOG41091UH	The_proteasome_is_a_multicatalytic_proteinase_complex_which_is_characterized_by_its_ability_to_cleave_peptides_with_Arg,_Phe,_Tyr,_Leu,_and_Glu_adjacent_to_the_leaving_group_at_neutral_or_slightly_basic_pH._The_proteasome_has_an_ATP-dependent_proteolytic_activity_(By_similarity)
MvSl-1064-A1-R4_MC12g10997	AUTOSOME	upregulated	no positive selection	ENOG41094R1	Protein_of_unknown_function_(DUF2638)
MvSl-1064-A1-R4_MC12g10998	AUTOSOME	upregulated	no positive selection	ENOG41091RH	PPR_repeat
MvSl-1064-A1-R4_MC12g11003	AUTOSOME	upregulated	no positive selection	ENOG410910H	Elongation_factor_2
MvSl-1064-A1-R4_MC12g11007	AUTOSOME	upregulated	no positive selection	ENOG41092CB	Histone-binding_protein_RBBP4_or_subunit_C_of_CAF1_complex
MvSl-1064-A1-R4_MC12g11013	AUTOSOME	upregulated	no positive selection	ENOG41095SI	NA
MvSl-1064-A1-R4_MC12g11014	AUTOSOME	upregulated	no positive selection	ENOG4109169	EMG1/NEP1_methyltransferase
MvSl-1064-A1-R4_MC12g11015	AUTOSOME	upregulated	no positive selection	ENOG41094IH	Essential_protein_Yae1,_N_terminal
MvSl-1064-A1-R4_MC12g11032	AUTOSOME	upregulated	no positive selection	ENOG41093AU	ribosomal_protein
MvSl-1064-A1-R4_MC12g11048	AUTOSOME	upregulated	no positive selection	ENOG41093ND	U3_small_nucleolar_RNA-associated_protein_11
MvSl-1064-A1-R4_MC12g11049	AUTOSOME	upregulated	no positive selection	ENOG41091G6	Nuclear_protein_localization_protein_4
MvSl-1064-A1-R4_MC12g11053	AUTOSOME	upregulated	no positive selection	ENOG41094TC	Phosphorylase_is_an_important_allosteric_enzyme_in_carbohydrate_metabolism._Enzymes_from_different_sources_differ_in_their_regulatory_mechanisms_and_in_their_natural_substrates._However,_all_known_phosphorylases_share_catalytic_and_structural_properties_(By_similarity)
MvSl-1064-A1-R4_MC12g11061	AUTOSOME	upregulated	no positive selection	ENOG41091WW	tRNA_synthetases_class_II_(D,_K_and_N)
MvSl-1064-A1-R4_MC12g11062	AUTOSOME	upregulated	no positive selection	ENOG41093Q6	Carrier_of_the_growing_fatty_acid_chain_in_fatty_acid_biosynthesis_(By_similarity)
MvSl-1064-A1-R4_MC12g11064	AUTOSOME	upregulated	no positive selection	NA	NA
MvSl-1064-A1-R4_MC12g11085	AUTOSOME	upregulated	no positive selection	ENOG41091NV	7,8-dihydro-6-hydroxymethylpterin-pyrophosphokinase_(HPPK)
MvSl-1064-A1-R4_MC12g11091	AUTOSOME	upregulated	no positive selection	ENOG41092AK	uracil_phosphoribosyltransferase
MvSl-1064-A1-R4_MC12g11097	AUTOSOME	upregulated	no positive selection	ENOG41094DU	ribosomal_protein
MvSl-1064-A1-R4_MC12g11122	AUTOSOME	upregulated	no positive selection	ENOG41099BD	RNA_recognition_motif._(a.k.a._RRM,_RBD,_or_RNP_domain)
MvSl-1064-A1-R4_MC12g11129	AUTOSOME	upregulated	no positive selection	ENOG41092AY	rRNA_primary_transcript_binding_protein
MvSl-1064-A1-R4_MC12g11143	AUTOSOME	upregulated	no positive selection	ENOG410925D	K05692_actin_beta_gamma_1
MvSl-1064-A1-R4_MC12g11165	AUTOSOME	upregulated	no positive selection	ENOG4109259	Component_of_the_eukaryotic_translation_initiation_factor_3_(eIF-3)_complex,_which_is_involved_in_protein_synthesis_and,_together_with_other_initiation_factors,_stimulates_binding_of_mRNA_and_methionyl-tRNAi_to_the_40S_ribosome_(By_similarity)
MvSl-1064-A1-R4_MC12g11167	AUTOSOME	upregulated	no positive selection	ENOG41090ZG	Multicopper_oxidase
MvSl-1064-A1-R4_MC12g11169	AUTOSOME	upregulated	no positive selection	ENOG410914I	Sec63
MvSl-1064-A1-R4_MC12g11180	AUTOSOME	upregulated	no positive selection	ENOG41091VC	Monosaccharide_transporter
MvSl-1064-A1-R4_MC12g11182	AUTOSOME	upregulated	no positive selection	ENOG41094TJ	NA
MvSl-1064-A1-R4_MC12g11184	AUTOSOME	upregulated	no positive selection	ENOG410949D	Inherit_from_fuNOG:_complex_subunit_(Rsc9)
MvSl-1064-A1-R4_MC12g11188	AUTOSOME	upregulated	no positive selection	ENOG410948X	RNA_recognition_motif._(a.k.a._RRM,_RBD,_or_RNP_domain)
MvSl-1064-A1-R4_MC12g11198	AUTOSOME	upregulated	no positive selection	ENOG4109351	Glyco_18
MvSl-1064-A1-R4_MC12g11199	AUTOSOME	upregulated	no positive selection	ENOG410923A	Not1_N-terminal_domain,_CCR4-Not_complex_component
MvSl-1064-A1-R4_MC12g11201	AUTOSOME	upregulated	no positive selection	ENOG41091AR	DNA_helicase_which_participates_in_several_chromatin_remodeling_complexes,_including_the_SWR1_and_the_INO80_complexes._The_SWR1_complex_mediates_the_ATP-dependent_exchange_of_histone_H2A_for_the_H2A_variant_HZT1_leading_to_transcriptional_regulation_of_selected_genes_by_chromatin_remodeling._The_INO80_complex_remodels_chromatin_by_shifting_nucleosomes_and_is_involved_in_DNA_repair._Also_involved_…
MvSl-1064-A1-R4_MC12g11212	AUTOSOME	upregulated	no positive selection	ENOG41091XC	The_AROM_polypeptide_catalyzes_5_consecutive_enzymatic_reactions_in_prechorismate_polyaromatic_amino_acid_biosynthesis_(By_similarity)
MvSl-1064-A1-R4_MC12g11224	AUTOSOME	upregulated	no positive selection	ENOG41091XI	aspartate_Aminotransferase
MvSl-1064-A1-R4_MC12g11228	AUTOSOME	upregulated	no positive selection	ENOG410934K	Glycoside_hydrolase_family_23_protein
MvSl-1064-A1-R4_MC12g11235	AUTOSOME	upregulated	no positive selection	ENOG4109185	heparinase_II_III_family_protein
MvSl-1064-A1-R4_MC12g11249	AUTOSOME	upregulated	no positive selection	ENOG41092JJ	synthase
MvSl-1064-A1-R4_MC12g11266	AUTOSOME	upregulated	no positive selection	ENOG41092VK	Low_temperature_viability_protein
MvSl-1064-A1-R4_MC13g11297	AUTOSOME	upregulated	no positive selection	ENOG41094MB	Protein_of_unknown_function_(DUF2392)
MvSl-1064-A1-R4_MC13g11354	AUTOSOME	upregulated	no positive selection	ENOG410944F	Mitochondrial_import_receptor_subunit_Tom22
MvSl-1064-A1-R4_MC13g11371	AUTOSOME	upregulated	no positive selection	ENOG41093SY	F-actin_capping_protein_alpha_subunit
MvSl-1064-A1-R4_MC13g11372	AUTOSOME	upregulated	no positive selection	ENOG41092VX	Anthranilate_phosphoribosyltransferase
MvSl-1064-A1-R4_MC13g11398	AUTOSOME	upregulated	no positive selection	ENOG4109129	Phosphoenolpyruvate_carboxykinase
MvSl-1064-A1-R4_MC13g11405	AUTOSOME	upregulated	no positive selection	ENOG41091HW	Cyclin-dependent_protein_kinase_regulator
MvSl-1064-A1-R4_MC13g11406	AUTOSOME	upregulated	no positive selection	ENOG41092E1	BUB_protein_kinase
MvSl-1064-A1-R4_MC13g11420	AUTOSOME	upregulated	no positive selection	ENOG41094E8	Proteasome_complex_subunit_Rpn13_ubiquitin_receptor
MvSl-1064-A1-R4_MC13g11423	AUTOSOME	upregulated	no positive selection	ENOG41092UK	Yip1_domain
MvSl-1064-A1-R4_MC13g11436	AUTOSOME	upregulated	no positive selection	ENOG41092QJ	NOL1/NOP2/sun_family
MvSl-1064-A1-R4_MC13g11441	AUTOSOME	upregulated	no positive selection	ENOG41094A3	Involved_in_the_regulation_of_enzymes_involved_in_acetate_assimilation_like_gluconeogenesis,_the_glyoxylate_cycle,_and_acetyl-CoA_metabolism_(By_similarity)
MvSl-1064-A1-R4_MC13g11454	AUTOSOME	upregulated	no positive selection	ENOG41095FH	NA
MvSl-1064-A1-R4_MC13g11459	AUTOSOME	upregulated	no positive selection	ENOG41097EG	Ribonuclease_H2_non-catalytic_subunit_(Ylr154p-like)
MvSl-1064-A1-R4_MC13g11473	AUTOSOME	upregulated	no positive selection	ENOG41093H3	Der1-like_family
MvSl-1064-A1-R4_MC13g11478	AUTOSOME	upregulated	no positive selection	ENOG41091VX	ribosomal_protein_L3
MvSl-1064-A1-R4_MC13g11479	AUTOSOME	upregulated	no positive selection	NA	NA
MvSl-1064-A1-R4_MC13g11481	AUTOSOME	upregulated	no positive selection	ENOG41094MI	Fcf2_pre-rRNA_processing
MvSl-1064-A1-R4_MC13g11495	AUTOSOME	upregulated	no positive selection	ENOG41094F7	NA
MvSl-1064-A1-R4_MC13g11511	AUTOSOME	upregulated	no positive selection	ENOG41092KN	WD_domain,_G-beta_repeat
MvSl-1064-A1-R4_MC13g11515	AUTOSOME	upregulated	no positive selection	ENOG41092II	Isocitrate_dehydrogenase_NADP
MvSl-1064-A1-R4_MC13g11522	AUTOSOME	upregulated	no positive selection	ENOG41091YQ	Structure-specific_nuclease_with_5'-flap_endonuclease_and_5'-3'_exonuclease_activities_involved_in_DNA_replication_and_repair._During_DNA_replication,_cleaves_the_5'-overhanging_flap_structure_that_is_generated_by_displacement_synthesis_when_DNA_polymerase_encounters_the_5'-end_of_a_downstream_Okazaki_fragment._It_enters_the_flap_from_the_5'-end_and_then_tracks_to_cleave_the_flap_base,_leaving_a_…
MvSl-1064-A1-R4_MC13g11523	AUTOSOME	upregulated	no positive selection	ENOG4109375	Excises_uracil_residues_from_the_DNA_which_can_arise_as_a_result_of_misincorporation_of_dUMP_residues_by_DNA_polymerase_or_due_to_deamination_of_cytosine_(By_similarity)
MvSl-1064-A1-R4_MC13g11527	AUTOSOME	upregulated	no positive selection	ENOG410918G	Endoplasmic_reticulum_protein_ERp29,_C-terminal_domain
MvSl-1064-A1-R4_MC13g11528	AUTOSOME	upregulated	no positive selection	ENOG410930W	U1_snRNP_70K_protein
MvSl-1064-A1-R4_MC13g11533	AUTOSOME	upregulated	no positive selection	ENOG41092Y1	Converts_protoheme_IX_and_farnesyl_diphosphate_to_heme_O_(By_similarity)
MvSl-1064-A1-R4_MC13g11538	AUTOSOME	upregulated	no positive selection	ENOG41095FM	Arv1-like_family
MvSl-1064-A1-R4_MC13g11539	AUTOSOME	upregulated	no positive selection	ENOG41092HA	Regulatory_subunit_of_the_condensin_complex,_a_complex_required_for_conversion_of_interphase_chromatin_into_mitotic-like_condense_chromosomes._The_condensin_complex_probably_introduces_positive_supercoils_into_relaxed_DNA_in_the_presence_of_type_I_topoisomerases_and_converts_nicked_DNA_into_positive_knotted_forms_in_the_presence_of_type_II_topoisomerases_(By_similarity)
MvSl-1064-A1-R4_MC13g11541	AUTOSOME	upregulated	no positive selection	ENOG41093H1	Pfam:Acid_phosphat_A
MvSl-1064-A1-R4_MC13g11542	AUTOSOME	upregulated	no positive selection	ENOG41093H1	Pfam:Acid_phosphat_A
MvSl-1064-A1-R4_MC13g11546	AUTOSOME	upregulated	no positive selection	ENOG410940X	Cytochrome_oxidase_c_subunit_VIb
MvSl-1064-A1-R4_MC13g11560	AUTOSOME	upregulated	no positive selection	ENOG410921Y	Protein_of_unknown_function_(DUF933)
MvSl-1064-A1-R4_MC13g11562	AUTOSOME	upregulated	no positive selection	ENOG41094FG	Protein_of_unknown_function_(DUF3605)
MvSl-1064-A1-R4_MC13g11563	AUTOSOME	upregulated	no positive selection	NA	NA
MvSl-1064-A1-R4_MC13g11570	AUTOSOME	upregulated	no positive selection	ENOG41093Y3	Las1-like
MvSl-1064-A1-R4_MC13g11575	AUTOSOME	upregulated	no positive selection	ENOG410945C	BRCT
MvSl-1064-A1-R4_MC13g11584	AUTOSOME	upregulated	no positive selection	ENOG410935N	Ferric_reductase_like_transmembrane_component
MvSl-1064-A1-R4_MC13g11586	AUTOSOME	upregulated	no positive selection	ENOG41094JH	Microsomal_signal_peptidase_25_kDa_subunit_(SPC25)
MvSl-1064-A1-R4_MC13g11587	AUTOSOME	upregulated	no positive selection	ENOG41092NM	40S_ribosomal_protein_S13
MvSl-1064-A1-R4_MC13g11589	AUTOSOME	upregulated	no positive selection	ENOG4109208	40S_ribosomal_protein_S6
MvSl-1064-A1-R4_MC13g11592	AUTOSOME	upregulated	no positive selection	ENOG410927M	Amino_acid_permease
MvSl-1064-A1-R4_MC13g11595	AUTOSOME	upregulated	no positive selection	ENOG4109403	Inherit_from_euNOG:_NADH_dehydrogenase_ubiquinone_iron-sulfur_protein
MvSl-1064-A1-R4_MC13g11596	AUTOSOME	upregulated	no positive selection	ENOG41095EM	Cellulase_(glycosyl_hydrolase_family_5)
MvSl-1064-A1-R4_MC13g11597	AUTOSOME	upregulated	no positive selection	ENOG41099D6	Inherit_from_fuNOG:_l-ornithine
MvSl-1064-A1-R4_MC13g11600	AUTOSOME	upregulated	no positive selection	ENOG41092W1	Mitochondrial_matrix_Mmp37
MvSl-1064-A1-R4_MC13g11607	AUTOSOME	upregulated	no positive selection	ENOG410952H	RmlD_substrate_binding_domain
MvSl-1064-A1-R4_MC13g11614	AUTOSOME	upregulated	no positive selection	ENOG41098CC	NA
MvSl-1064-A1-R4_MC13g11615	AUTOSOME	upregulated	no positive selection	ENOG41091IM	May_be_involved_in_specific_transport_of_UDP-Gal_from_the_cytosol_to_the_Golgi_lumen._Involved_in_the_maintenance_of_optimal_conditions_for_the_folding_of_secretory_pathway_proteins_in_the_endoplasmic_reticulum_(By_similarity)
MvSl-1064-A1-R4_MC13g11617	AUTOSOME	upregulated	no positive selection	ENOG41091X0	Endoplasmic_reticulum_vesicle_transporter
MvSl-1064-A1-R4_MC13g11619	AUTOSOME	upregulated	no positive selection	NA	NA
MvSl-1064-A1-R4_MC13g11625	AUTOSOME	upregulated	no positive selection	ENOG41093M5	Pfam:DUF2343
MvSl-1064-A1-R4_MC13g11634	AUTOSOME	upregulated	no positive selection	ENOG410944Y	NA
MvSl-1064-A1-R4_MC13g11635	AUTOSOME	upregulated	no positive selection	ENOG41095MP	NA
MvSl-1064-A1-R4_MC13g11636	AUTOSOME	upregulated	no positive selection	ENOG410928R	Thymidylate_synthase
MvSl-1064-A1-R4_MC13g11637	AUTOSOME	upregulated	no positive selection	ENOG41098VH	NA
MvSl-1064-A1-R4_MC13g11656	AUTOSOME	upregulated	no positive selection	ENOG4109470	Ribosomal_protein_L30p/L7e
MvSl-1064-A1-R4_MC13g11657	AUTOSOME	upregulated	no positive selection	ENOG41093E3	RNA_recognition_motif._(a.k.a._RRM,_RBD,_or_RNP_domain)
MvSl-1064-A1-R4_MC13g11669	AUTOSOME	upregulated	no positive selection	ENOG410914W	Pfam:Mov34
MvSl-1064-A1-R4_MC13g11677	AUTOSOME	upregulated	no positive selection	ENOG41091X8	Galactose-1-phosphate_uridylyltransferase
MvSl-1064-A1-R4_MC13g11683	AUTOSOME	upregulated	no positive selection	ENOG41093UH	mitochondrial_37S_ribosomal_protein_YmS18
MvSl-1064-A1-R4_MC13g11686	AUTOSOME	upregulated	no positive selection	ENOG41093ET	Phosphate_transport_(Pho88)
MvSl-1064-A1-R4_MC13g11688	AUTOSOME	upregulated	no positive selection	ENOG41091F0	Ribonucleotide_reductase,_small_chain
MvSl-1064-A1-R4_MC13g11703	AUTOSOME	upregulated	no positive selection	ENOG41097RN	Inherit_from_fuNOG:_conserved_hypothetical_protein
MvSl-1064-A1-R4_MC13g11704	AUTOSOME	upregulated	no positive selection	ENOG4109267	ATP-dependent_RNA_helicase_involved_in_40S_ribosomal_subunit_biogenesis._Required_for_the_processing_and_cleavage_of_35S_pre-rRNA_at_sites_A0,_A1,_and_A2,_leading_to_mature_18S_rRNA
MvSl-1064-A1-R4_MC13g11707	AUTOSOME	upregulated	no positive selection	ENOG41095JP	Pfam:ICln_channel
MvSl-1064-A1-R4_MC13g11708	AUTOSOME	upregulated	no positive selection	ENOG41095B8	GNS1/SUR4_family
MvSl-1064-A1-R4_MC13g11711	AUTOSOME	upregulated	no positive selection	ENOG41091RX	citrate_synthase
MvSl-1064-A1-R4_MC14g11751	AUTOSOME	upregulated	no positive selection	ENOG41092KB	Aminotransferase_class_I_and_II
MvSl-1064-A1-R4_MC14g11752	AUTOSOME	upregulated	no positive selection	ENOG410999C	Aminotransferase_class-III
MvSl-1064-A1-R4_MC14g11757	AUTOSOME	upregulated	no positive selection	NA	NA
MvSl-1064-A1-R4_MC14g11770	AUTOSOME	upregulated	no positive selection	ENOG41093AK	Phosphatidylethanolamine-binding_protein
MvSl-1064-A1-R4_MC14g11776	AUTOSOME	upregulated	no positive selection	ENOG41092RK	Glutaredoxin
MvSl-1064-A1-R4_MC14g11797	AUTOSOME	upregulated	no positive selection	ENOG41092J1	RasGAP_C-terminus
MvSl-1064-A1-R4_MC14g11834	AUTOSOME	upregulated	no positive selection	ENOG4109226	Catalyzes_the_synthesis_of_activated_sulfate_(By_similarity)
MvSl-1064-A1-R4_MC14g11838	AUTOSOME	upregulated	no positive selection	ENOG41095XP	Inherit_from_euNOG:_LYR_motif_containing_7
MvSl-1064-A1-R4_MC14g11850	AUTOSOME	upregulated	no positive selection	ENOG41090Z9	fatty_acid_synthase
MvSl-1064-A1-R4_MC14g11851	AUTOSOME	upregulated	no positive selection	ENOG41090Z9	fatty_acid_synthase
MvSl-1064-A1-R4_MC14g11856	AUTOSOME	upregulated	no positive selection	ENOG41092VV	RPOLD
MvSl-1064-A1-R4_MC14g11861	AUTOSOME	upregulated	no positive selection	ENOG41091NS	60s_ribosomal_protein_l7
MvSl-1064-A1-R4_MC14g11862	AUTOSOME	upregulated	no positive selection	ENOG41091NS	60s_ribosomal_protein_l7
MvSl-1064-A1-R4_MC14g11864	AUTOSOME	upregulated	no positive selection	ENOG41093YN	Domain_of_unknown_function_(DUF202)
MvSl-1064-A1-R4_MC14g11884	AUTOSOME	upregulated	no positive selection	ENOG41099BZ	PGAM
MvSl-1064-A1-R4_MC14g11903	AUTOSOME	upregulated	no positive selection	ENOG41091PW	Mechanosensitive_ion_channel
MvSl-1064-A1-R4_MC14g11914	AUTOSOME	upregulated	no positive selection	ENOG41095QX	DSS1/SEM1_family
MvSl-1064-A1-R4_MC14g11918	AUTOSOME	upregulated	no positive selection	ENOG4109252	Tricarboxylate_carrier
MvSl-1064-A1-R4_MC14g11919	AUTOSOME	upregulated	no positive selection	NA	NA
MvSl-1064-A1-R4_MC14g11923	AUTOSOME	upregulated	no positive selection	ENOG41092SK	Rubisco_LSMT_substrate-binding
MvSl-1064-A1-R4_MC14g11942	AUTOSOME	upregulated	no positive selection	ENOG41092I4	Fatty_acid_hydroxylase_superfamily
MvSl-1064-A1-R4_MC14g11949	AUTOSOME	upregulated	no positive selection	ENOG41094CB	Domain_of_unknown_function_(DUF543)
MvSl-1064-A1-R4_MC15g12025	AUTOSOME	upregulated	no positive selection	ENOG410917D	Heat_shock_protein
MvSl-1064-A1-R4_MC15g12035	AUTOSOME	upregulated	no positive selection	ENOG4109467	Dihydrofolate_reductase
MvSl-1064-A1-R4_MC15g12057	AUTOSOME	upregulated	no positive selection	ENOG41091T4	STE_STE20_PAKA_protein_kinase
MvSl-1064-A1-R4_MC15g12079	AUTOSOME	upregulated	no positive selection	ENOG41093SZ	Required_for_the_import_and_folding_of_small_cysteine-_containing_proteins_(small_Tim)_in_the_mitochondrial_intermembrane_space_(IMS)._Forms_a_redox_cycle_with_ERV1_that_involves_a_disulfide_relay_system._Precursor_proteins_to_be_imported_into_the_IMS_are_translocated_in_their_reduced_form_into_the_mitochondria._The_oxidized_form_of_MIA40_forms_a_transient_intermolecular_disulfide_bridge_with_the…
MvSl-1064-A1-R4_MC15g12088	AUTOSOME	upregulated	no positive selection	ENOG410912Y	Polyprenyl_synthetase
MvSl-1064-A1-R4_MC15g12094	AUTOSOME	upregulated	no positive selection	ENOG41091M2	NADH_ubiquinone_oxidoreductase,_20_Kd_subunit
MvSl-1064-A1-R4_MC15g12096	AUTOSOME	upregulated	no positive selection	ENOG410939I	Inherit_from_fuNOG:_S-adenosylmethionine-dependent_methyltransferase
MvSl-1064-A1-R4_MC15g12097	AUTOSOME	upregulated	no positive selection	ENOG410973E	NA
MvSl-1064-A1-R4_MC15g12102	AUTOSOME	upregulated	no positive selection	NA	NA
MvSl-1064-A1-R4_MC15g12105	AUTOSOME	upregulated	no positive selection	ENOG41091BD	DALR_1
MvSl-1064-A1-R4_MC15g12107	AUTOSOME	upregulated	no positive selection	ENOG41094IE	SAP_domain
MvSl-1064-A1-R4_MC15g12112	AUTOSOME	upregulated	no positive selection	ENOG41093AJ	Gpi16_subunit,_GPI_transamidase_component
MvSl-1064-A1-R4_MC15g12124	AUTOSOME	upregulated	no positive selection	ENOG4109348	NA
MvSl-1064-A1-R4_MC16g12182	AUTOSOME	upregulated	no positive selection	ENOG41093EM	Pyridine_nucleotide-disulphide_oxidoreductase
MvSl-1064-A1-R4_MC16g12184	AUTOSOME	upregulated	no positive selection	ENOG41093QF	Pfam:Nse4
MvSl-1064-A1-R4_MC17g12231	AUTOSOME	upregulated	no positive selection	ENOG410954J	Inherit_from_KOG:_desaturase
MvSl-1064-A1-R4_MC17g12234	AUTOSOME	upregulated	no positive selection	ENOG410952H	RmlD_substrate_binding_domain
MvSl-1064-A1-R4_A1g00230	PURPLE	upregulated	NA	ENOG410932J	Histone_chaperone_that_facilitates_histone_deposition_and_histone_exchange_and_removal_during_nucleosome_assembly_and_disassembly_(By_similarity)
MvSl-1064-A1-R4_A1g00634	BLACK	upregulated	NA	NA	NA
MvSl-1064-A1-R4_A1g00886	BLACK	upregulated	NA	ENOG410958R	Inherit_from_fuNOG:_conserved_hypothetical_protein
MvSl-1064-A1-R4_A1g00969	BLACK	upregulated	NA	NA	NA
MvSl-1064-A1-R4_A1g01359	BLACK	upregulated	NA	ENOG41097V9	Condensation_domain
MvSl-1064-A1-R4_MC01-1g02004	AUTOSOME	upregulated	NA	ENOG41098P2	Inherit_from_KOG:_myosin,_heavy_chain
MvSl-1064-A1-R4_MC01-1g02005	AUTOSOME	upregulated	NA	NA	NA
MvSl-1064-A1-R4_MC01-1g02078	AUTOSOME	upregulated	NA	ENOG410914M	Mitochondrial_carrier_protein
MvSl-1064-A1-R4_MC01-1g02114	AUTOSOME	upregulated	NA	ENOG410936M	LSM_domain
MvSl-1064-A1-R4_MC01-1g02159	AUTOSOME	upregulated	NA	NA	NA
MvSl-1064-A1-R4_MC01-1g02160	AUTOSOME	upregulated	NA	NA	NA
MvSl-1064-A1-R4_MC01-1g02324	AUTOSOME	upregulated	NA	NA	NA
MvSl-1064-A1-R4_MC01-1g02327	AUTOSOME	upregulated	NA	NA	NA
MvSl-1064-A1-R4_MC01-1g02452	AUTOSOME	upregulated	NA	ENOG41092N0	ribosomal_protein_L19
MvSl-1064-A1-R4_MC01-1g02512	AUTOSOME	upregulated	NA	ENOG41093AP	Involved_in_transport_from_the_ER_to_the_Golgi_apparatus_as_well_as_in_intra-Golgi_transport._It_belongs_to_a_super-family_of_proteins_called_t-SNAREs_or_soluble_NSF_(N-ethylmaleimide-_sensitive_factor)_attachment_protein_receptor_(By_similarity)
MvSl-1064-A1-R4_MC01-1g02515	AUTOSOME	upregulated	NA	NA	NA
MvSl-1064-A1-R4_MC01-1g02833	AUTOSOME	upregulated	NA	NA	NA
MvSl-1064-A1-R4_MC01-1g02836	AUTOSOME	upregulated	NA	ENOG410964Q	NA
MvSl-1064-A1-R4_MC01-1g02888	AUTOSOME	upregulated	NA	ENOG41099BA	Reverse_transcriptase_(RNA-dependent_DNA_polymerase)
MvSl-1064-A1-R4_MC01-2g03153	AUTOSOME	upregulated	NA	ENOG410912Q	RNA_recognition_motif._(a.k.a._RRM,_RBD,_or_RNP_domain)
MvSl-1064-A1-R4_MC02g03190	AUTOSOME	upregulated	NA	NA	NA
MvSl-1064-A1-R4_MC02g03499	AUTOSOME	upregulated	NA	NA	NA
MvSl-1064-A1-R4_MC02g03542	AUTOSOME	upregulated	NA	NA	NA
MvSl-1064-A1-R4_MC02g03574	AUTOSOME	upregulated	NA	ENOG41093AR	GNL3L/Grn1_putative_GTPase
MvSl-1064-A1-R4_MC02g03667	AUTOSOME	upregulated	NA	NA	NA
MvSl-1064-A1-R4_MC02g03668	AUTOSOME	upregulated	NA	ENOG41091ST	adenosylhomocysteinase
MvSl-1064-A1-R4_MC03g04548	AUTOSOME	upregulated	NA	ENOG41093C5	Core_component_of_nucleosome._Nucleosomes_wrap_and_compact_DNA_into_chromatin,_limiting_DNA_accessibility_to_the_cellular_machineries_which_require_DNA_as_a_template._Histones_thereby_play_a_central_role_in_transcription_regulation,_DNA_repair,_DNA_replication_and_chromosomal_stability._DNA_accessibility_is_regulated_via_a_complex_set_of_post-translational_modifications_of_histones,_also_called_h…
MvSl-1064-A1-R4_MC03g04583	AUTOSOME	upregulated	NA	NA	NA
MvSl-1064-A1-R4_MC03g04744	AUTOSOME	upregulated	NA	ENOG41096VG	NA
MvSl-1064-A1-R4_MC03g04755	AUTOSOME	upregulated	NA	NA	NA
MvSl-1064-A1-R4_MC03g04987	AUTOSOME	upregulated	NA	ENOG410937D	Cytidine_and_deoxycytidylate_deaminase_zinc-binding_region
MvSl-1064-A1-R4_MC03g04993	AUTOSOME	upregulated	NA	NA	NA
MvSl-1064-A1-R4_MC03g05175	AUTOSOME	upregulated	NA	NA	NA
MvSl-1064-A1-R4_MC03g05231	AUTOSOME	upregulated	NA	NA	NA
MvSl-1064-A1-R4_MC04-1g05272	AUTOSOME	upregulated	NA	ENOG410979E	NA
MvSl-1064-A1-R4_MC04-1g05285	AUTOSOME	upregulated	NA	ENOG41093V6	ER_to_Golgi_transport-related_protein
MvSl-1064-A1-R4_MC04-1g05297	AUTOSOME	upregulated	NA	NA	NA
MvSl-1064-A1-R4_MC04-1g05375	AUTOSOME	upregulated	NA	NA	NA
MvSl-1064-A1-R4_MC04-1g05395	AUTOSOME	upregulated	NA	ENOG41097IS	Reverse_transcriptase_(RNA-dependent_DNA_polymerase)
MvSl-1064-A1-R4_MC04-1g05443	AUTOSOME	upregulated	NA	NA	NA
MvSl-1064-A1-R4_MC04-1g05444	AUTOSOME	upregulated	NA	ENOG4109336	Ulp1_protease_family,_C-terminal_catalytic_domain
MvSl-1064-A1-R4_MC04-1g05571	AUTOSOME	upregulated	NA	NA	NA
MvSl-1064-A1-R4_MC04-1g05863	AUTOSOME	upregulated	NA	ENOG410923A	Not1_N-terminal_domain,_CCR4-Not_complex_component
MvSl-1064-A1-R4_MC04-1g06053	AUTOSOME	upregulated	NA	NA	NA
MvSl-1064-A1-R4_MC04-1g06054	AUTOSOME	upregulated	NA	ENOG41095UE	NA
MvSl-1064-A1-R4_MC05-1g06163	AUTOSOME	upregulated	NA	ENOG41097DI	other_FunK1_protein_kinase
MvSl-1064-A1-R4_MC05-1g06248	AUTOSOME	upregulated	NA	ENOG41093QH	Histone-like_transcription_factor_(CBF/NF-Y)_and_archaeal_histone
MvSl-1064-A1-R4_MC05-1g06258	AUTOSOME	upregulated	NA	NA	NA
MvSl-1064-A1-R4_MC06g06895	AUTOSOME	upregulated	NA	ENOG41094M1	Inherit_from_opiNOG:_LYR_motif_containing_4
MvSl-1064-A1-R4_MC06g06897	AUTOSOME	upregulated	NA	NA	NA
MvSl-1064-A1-R4_MC06g06911	AUTOSOME	upregulated	NA	NA	NA
MvSl-1064-A1-R4_MC06g06946	AUTOSOME	upregulated	NA	NA	NA
MvSl-1064-A1-R4_MC06g06947	AUTOSOME	upregulated	NA	ENOG41091XW	Peptidase_family_M1
MvSl-1064-A1-R4_MC06g07223	AUTOSOME	upregulated	NA	NA	NA
MvSl-1064-A1-R4_MC06g07224	AUTOSOME	upregulated	NA	ENOG410913V	NOL1/NOP2/sun_family
MvSl-1064-A1-R4_MC06g07277	AUTOSOME	upregulated	NA	NA	NA
MvSl-1064-A1-R4_MC06g07344	AUTOSOME	upregulated	NA	NA	NA
MvSl-1064-A1-R4_MC06g07365	AUTOSOME	upregulated	NA	NA	NA
MvSl-1064-A1-R4_MC06g07366	AUTOSOME	upregulated	NA	ENOG410911T	Succinate_dehydrogenase_flavoprotein_subunit
MvSl-1064-A1-R4_MC06g07539	AUTOSOME	upregulated	NA	ENOG41095XM	other_FunK1_protein_kinase
MvSl-1064-A1-R4_MC07g07637	AUTOSOME	upregulated	NA	ENOG410923A	Not1_N-terminal_domain,_CCR4-Not_complex_component
MvSl-1064-A1-R4_MC07g07677	AUTOSOME	upregulated	NA	ENOG41097UV	guanine_nucleotide-binding_protein_alpha-4_subunit
MvSl-1064-A1-R4_MC07g07692	AUTOSOME	upregulated	NA	NA	NA
MvSl-1064-A1-R4_MC07g07924	AUTOSOME	upregulated	NA	ENOG4109384	Core_component_of_nucleosome._Nucleosomes_wrap_and_compact_DNA_into_chromatin,_limiting_DNA_accessibility_to_the_cellular_machineries_which_require_DNA_as_a_template._Histones_thereby_play_a_central_role_in_transcription_regulation,_DNA_repair,_DNA_replication_and_chromosomal_stability._DNA_accessibility_is_regulated_via_a_complex_set_of_post-translational_modifications_of_histones,_also_called_h…
MvSl-1064-A1-R4_MC07g08034	AUTOSOME	upregulated	NA	ENOG410923Z	phosphoribosylaminoimidazole-succinocarboxamide_synthase
MvSl-1064-A1-R4_MC07g08186	AUTOSOME	upregulated	NA	ENOG410933K	40S_ribosomal_protein_S14
MvSl-1064-A1-R4_MC07g08189	AUTOSOME	upregulated	NA	ENOG41092NQ	UBCc
MvSl-1064-A1-R4_MC07g08255	AUTOSOME	upregulated	NA	ENOG41095XM	other_FunK1_protein_kinase
MvSl-1064-A1-R4_MC08g08304	AUTOSOME	upregulated	NA	ENOG41097FG	NA
MvSl-1064-A1-R4_MC08g08332	AUTOSOME	upregulated	NA	NA	NA
MvSl-1064-A1-R4_MC08g08516	AUTOSOME	upregulated	NA	NA	NA
MvSl-1064-A1-R4_MC08g08665	AUTOSOME	upregulated	NA	NA	NA
MvSl-1064-A1-R4_MC08g08711	AUTOSOME	upregulated	NA	NA	NA
MvSl-1064-A1-R4_MC08g08712	AUTOSOME	upregulated	NA	ENOG410929S	DHHA1_domain
MvSl-1064-A1-R4_MC08g08760	AUTOSOME	upregulated	NA	ENOG41094U6	Ion_channel_regulatory_protein_UNC-93
MvSl-1064-A1-R4_MC08g08834	AUTOSOME	upregulated	NA	ENOG410932V	OST3_/_OST6_family
MvSl-1064-A1-R4_MC09-2g08988	AUTOSOME	upregulated	NA	NA	NA
MvSl-1064-A1-R4_MC09-2g09090	AUTOSOME	upregulated	NA	NA	NA
MvSl-1064-A1-R4_MC09-2g09152	AUTOSOME	upregulated	NA	ENOG410943S	NA
MvSl-1064-A1-R4_MC09-2g09338	AUTOSOME	upregulated	NA	ENOG41096YY	DASH_complex_subunit_Dad4
MvSl-1064-A1-R4_MC09-2g09526	AUTOSOME	upregulated	NA	NA	NA
MvSl-1064-A1-R4_MC10-1g09587	AUTOSOME	upregulated	NA	ENOG41095XM	other_FunK1_protein_kinase
MvSl-1064-A1-R4_MC10-1g09591	AUTOSOME	upregulated	NA	ENOG41095XM	other_FunK1_protein_kinase
MvSl-1064-A1-R4_MC10-1g09644	AUTOSOME	upregulated	NA	ENOG41095JH	Fungal_specific_transcription_factor_domain
MvSl-1064-A1-R4_MC10-1g09649	AUTOSOME	upregulated	NA	ENOG41093MH	50S_ribosomal_protein_L22
MvSl-1064-A1-R4_MC10-1g09771	AUTOSOME	upregulated	NA	NA	NA
MvSl-1064-A1-R4_MC10-2g09943	AUTOSOME	upregulated	NA	NA	NA
MvSl-1064-A1-R4_MC10-2g10079	AUTOSOME	upregulated	NA	ENOG41096Z8	ZnF_C2HC
MvSl-1064-A1-R4_MC10-2g10095	AUTOSOME	upregulated	NA	ENOG410916Q	Dihydrolipoyl_dehydrogenase
MvSl-1064-A1-R4_MC11g10284	AUTOSOME	upregulated	NA	ENOG41094KX	LETM1-like_protein
MvSl-1064-A1-R4_MC11g10627	AUTOSOME	upregulated	NA	ENOG41094X1	argonaute-like_protein
MvSl-1064-A1-R4_MC12g10894	AUTOSOME	upregulated	NA	ENOG41096Y1	NA
MvSl-1064-A1-R4_MC12g11132	AUTOSOME	upregulated	NA	ENOG410999R	WH1_domain
MvSl-1064-A1-R4_MC12g11135	AUTOSOME	upregulated	NA	NA	NA
MvSl-1064-A1-R4_MC12g11207	AUTOSOME	upregulated	NA	NA	NA
MvSl-1064-A1-R4_MC12g11209	AUTOSOME	upregulated	NA	NA	NA
MvSl-1064-A1-R4_MC13g11389	AUTOSOME	upregulated	NA	NA	NA
MvSl-1064-A1-R4_MC13g11429	AUTOSOME	upregulated	NA	NA	NA
MvSl-1064-A1-R4_MC13g11608	AUTOSOME	upregulated	NA	NA	NA
MvSl-1064-A1-R4_MC14g11788	AUTOSOME	upregulated	NA	NA	NA
MvSl-1064-A1-R4_MC14g11789	AUTOSOME	upregulated	NA	NA	NA
MvSl-1064-A1-R4_A1g01129	BLACK	noDE	positive selection	ENOG41094EA	CS_domain
MvSl-1064-A1-R4_MC01-1g02015	AUTOSOME	noDE	positive selection	ENOG41095XF	Histone_deacetylation_protein_Rxt3
MvSl-1064-A1-R4_MC01-1g02388	AUTOSOME	noDE	positive selection	ENOG4109494	Velvet_factor
MvSl-1064-A1-R4_MC01-1g02674	AUTOSOME	noDE	positive selection	ENOG41099DK	FYVE
MvSl-1064-A1-R4_MC01-1g02709	AUTOSOME	noDE	positive selection	ENOG41095V4	Protein_of_unknown_function_(DUF1762)
MvSl-1064-A1-R4_MC01-1g02741	AUTOSOME	noDE	positive selection	ENOG41093XN	CPSF_A_subunit_region
MvSl-1064-A1-R4_MC01-2g03027	AUTOSOME	noDE	positive selection	NA	NA
MvSl-1064-A1-R4_MC01-2g03167	AUTOSOME	noDE	positive selection	ENOG4109510	Eukaryotic_aspartyl_protease
MvSl-1064-A1-R4_MC02g03525	AUTOSOME	noDE	positive selection	ENOG41093RW	8-oxoguanine_DNA_glycosylase,_N-terminal_domain
MvSl-1064-A1-R4_MC03g04387	AUTOSOME	noDE	positive selection	NA	NA
MvSl-1064-A1-R4_MC04-1g05736	AUTOSOME	noDE	positive selection	ENOG41094EG	LRR
MvSl-1064-A1-R4_MC05-3g06765	AUTOSOME	noDE	positive selection	ENOG41097YH	C2_domain
MvSl-1064-A1-R4_MC07g07552	AUTOSOME	noDE	positive selection	ENOG41094DW	FH
MvSl-1064-A1-R4_MC08g08317	AUTOSOME	noDE	positive selection	ENOG4109457	NA
MvSl-1064-A1-R4_MC08g08797	AUTOSOME	noDE	positive selection	ENOG41092QH	Transcription_factor_which_regulates_nonfermentable_carbon_utilization._Activator_of_gluconeogenetic_genes_(By_similarity)
MvSl-1064-A1-R4_MC09-2g09155	AUTOSOME	noDE	positive selection	ENOG4109398	Inherit_from_opiNOG:_N-acyl_phosphatidylethanolamine_phospholipase_D
MvSl-1064-A1-R4_MC09-2g09219	AUTOSOME	noDE	positive selection	ENOG41094GT	NA
MvSl-1064-A1-R4_MC09-2g09279	AUTOSOME	noDE	positive selection	ENOG41093HI	G_patch
MvSl-1064-A1-R4_MC09-2g09366	AUTOSOME	noDE	positive selection	ENOG410996Y	Inherit_from_fuNOG:_Involved_in_the_initiation_of_assembly_of_the_COPII_coat_required_for_the_formation_of_transport_vesicles_from_the_endoplasmic_reticulum_(ER)_and_the_selection_of_cargo_molecules._Also_involved_in_autophagy_(By_similarity)
MvSl-1064-A1-R4_MC09-2g09375	AUTOSOME	noDE	positive selection	NA	NA
MvSl-1064-A1-R4_MC10-1g09715	AUTOSOME	noDE	positive selection	ENOG41096VT	NA
MvSl-1064-A1-R4_MC11g10568	AUTOSOME	noDE	positive selection	ENOG41095CJ	NA
MvSl-1064-A1-R4_MC11g10613	AUTOSOME	noDE	positive selection	ENOG41095FS	Gtr1/RagA_G_protein_conserved_region
MvSl-1064-A1-R4_MC12g11255	AUTOSOME	noDE	positive selection	NA	NA
MvSl-1064-A1-R4_MC14g11748	AUTOSOME	noDE	positive selection	ENOG41091IR	Multiple_RNA-binding_domain-containing_protein_1
MvSl-1064-A1-R4_MC14g11848	AUTOSOME	noDE	positive selection	ENOG41092HQ	WD_domain,_G-beta_repeat
MvSl-1064-A1-R4_A1g00005	PAR	noDE	no positive selection	ENOG41094GQ	NA
MvSl-1064-A1-R4_A1g00007	PAR	noDE	no positive selection	ENOG41092CS	FHA
MvSl-1064-A1-R4_A1g00008	PAR	noDE	no positive selection	ENOG41094CP	Zinc_finger,_C2H2_type
MvSl-1064-A1-R4_A1g00009	PAR	noDE	no positive selection	ENOG41093FU	Peroxisomal_membrane_anchor_protein_(Pex14p)_conserved_region
MvSl-1064-A1-R4_A1g00013	PAR	noDE	no positive selection	ENOG41099BT	Major_Facilitator_Superfamily
MvSl-1064-A1-R4_A1g00016	PAR	noDE	no positive selection	NA	NA
MvSl-1064-A1-R4_A1g00017	PAR	noDE	no positive selection	ENOG410977W	Major_Facilitator_Superfamily
MvSl-1064-A1-R4_A1g00020	PAR	noDE	no positive selection	NA	NA
MvSl-1064-A1-R4_A1g00025	PAR	noDE	no positive selection	ENOG41097ZV	glycoside_hydrolase_family_28_protein
MvSl-1064-A1-R4_A1g00031	PAR	noDE	no positive selection	ENOG4109460	Inherit_from_fuNOG:_glutathione_s-transferase
MvSl-1064-A1-R4_A1g00032	PAR	noDE	no positive selection	ENOG4109552	Inherit_from_fuNOG:_transcription_factor_RfeF
MvSl-1064-A1-R4_A1g00033	PAR	noDE	no positive selection	ENOG410920V	K01477_allantoicase_EC_3.5.3.4
MvSl-1064-A1-R4_A1g00035	PAR	noDE	no positive selection	ENOG41096JH	NA
MvSl-1064-A1-R4_A1g00036	PAR	noDE	no positive selection	ENOG41096BG	Transcription_factor_TFIID_complex_subunit_8_C-term
MvSl-1064-A1-R4_A1g00037	PAR	noDE	no positive selection	ENOG410919S	Cleaves_proteins,_imported_into_the_mitochondrion,_to_their_mature_size._While_most_mitochondrial_precursor_proteins_are_processed_to_the_mature_form_in_one_step_by_mitochondrial_processing_peptidase_(MPP),_the_sequential_cleavage_by_MIP_of_an_octapeptide_after_initial_processing_by_MPP_is_a_required_step_for_a_subgroup_of_nuclear-encoded_precursor_proteins_destined_for_the_matrix_or_the_inner_me…
MvSl-1064-A1-R4_A1g00039	PAR	noDE	no positive selection	ENOG410921J	calcium_activated_cation_channel
MvSl-1064-A1-R4_A1g00040	PAR	noDE	no positive selection	ENOG41093PT	carbohydrate_esterase_family_4_protein
MvSl-1064-A1-R4_A1g00044	PAR	noDE	no positive selection	ENOG41093PT	carbohydrate_esterase_family_4_protein
MvSl-1064-A1-R4_A1g00046	PAR	noDE	no positive selection	ENOG41093PT	carbohydrate_esterase_family_4_protein
MvSl-1064-A1-R4_A1g00047	PAR	noDE	no positive selection	ENOG41093QV	NA
MvSl-1064-A1-R4_A1g00048	PAR	noDE	no positive selection	NA	NA
MvSl-1064-A1-R4_A1g00049	PAR	noDE	no positive selection	ENOG41092G9	ATP-binding_region
MvSl-1064-A1-R4_A1g00050	PAR	noDE	no positive selection	ENOG4109194	DNA-dependent_RNA_polymerase_catalyzes_the_transcription_of_DNA_into_RNA_using_the_four_ribonucleoside_triphosphates_as_substrates_(By_similarity)
MvSl-1064-A1-R4_A1g00051	PAR	noDE	no positive selection	ENOG410920D	Inositol_monophosphatase_family
MvSl-1064-A1-R4_A1g00052	PAR	noDE	no positive selection	NA	NA
MvSl-1064-A1-R4_A1g00053	PAR	noDE	no positive selection	ENOG41093UK	Inherit_from_KOG:_family_with_sequence_similarity_213,_member
MvSl-1064-A1-R4_A1g00054	PAR	noDE	no positive selection	ENOG41091JV	Dihydrouridine_synthase_(Dus)
MvSl-1064-A1-R4_A1g00055	PAR	noDE	no positive selection	ENOG41095NA	DASH_complex_subunit_Duo1
MvSl-1064-A1-R4_A1g00056	PAR	noDE	no positive selection	ENOG41094UF	Sugar_(and_other)_transporter
MvSl-1064-A1-R4_A1g00057	PAR	noDE	no positive selection	ENOG41096RX	NA
MvSl-1064-A1-R4_A1g00061	PAR	noDE	no positive selection	ENOG41092PW	RAB
MvSl-1064-A1-R4_A1g00062	PAR	noDE	no positive selection	ENOG4109339	RNA_recognition_motif._(a.k.a._RRM,_RBD,_or_RNP_domain)
MvSl-1064-A1-R4_A1g00063	PAR	noDE	no positive selection	ENOG41094AI	Component_of_the_Mediator_complex,_a_coactivator_involved_in_the_regulated_transcription_of_nearly_all_RNA_polymerase_II-dependent_genes._Mediator_functions_as_a_bridge_to_convey_information_from_gene-specific_regulatory_proteins_to_the_basal_RNA_polymerase_II_transcription_machinery._Mediator_is_recruited_to_promoters_by_direct_interactions_with_regulatory_proteins_and_serves_as_a_scaffold_for_t…
MvSl-1064-A1-R4_A1g00064	PAR	noDE	no positive selection	ENOG4109923	NA
MvSl-1064-A1-R4_A1g00065	PAR	noDE	no positive selection	ENOG4109276	Amidohydrolase_family
MvSl-1064-A1-R4_A1g00067	PAR	noDE	no positive selection	ENOG4109556	NA
MvSl-1064-A1-R4_A1g00068	PAR	noDE	no positive selection	ENOG41094UY	NA
MvSl-1064-A1-R4_A1g00069	PAR	noDE	no positive selection	ENOG41091QP	CAMK_CAMKL_Kin4_protein_kinase
MvSl-1064-A1-R4_A1g00070	PAR	noDE	no positive selection	ENOG41095S9	GDP/GTP_exchange_factor_Sec2p
MvSl-1064-A1-R4_A1g00071	PAR	noDE	no positive selection	ENOG41094WG	FAD_binding_domain
MvSl-1064-A1-R4_A1g00072	PAR	noDE	no positive selection	ENOG41092WH	Acyltransferase
MvSl-1064-A1-R4_A1g00073	PAR	noDE	no positive selection	ENOG41093E0	Cyclin
MvSl-1064-A1-R4_A1g00074	PAR	noDE	no positive selection	ENOG4109161	Protein_of_unknown_function_DUF89
MvSl-1064-A1-R4_A1g00075	PAR	noDE	no positive selection	ENOG41093JK	Glycosyl_Hydrolase_Family_88
MvSl-1064-A1-R4_A1g00076	PAR	noDE	no positive selection	ENOG4109132	Dynein_associated_protein
MvSl-1064-A1-R4_A1g00080	BLACK	noDE	no positive selection	ENOG41098KH	NA
MvSl-1064-A1-R4_A1g00110	GREEN	noDE	no positive selection	NA	NA
MvSl-1064-A1-R4_A1g00113	GREEN	noDE	no positive selection	ENOG410917W	STYKc
MvSl-1064-A1-R4_A1g00144	BLACK	noDE	no positive selection	ENOG41093GE	Functions_as_component_of_the_Arp2_3_complex_which_is_involved_in_regulation_of_actin_polymerization_and_together_with_an_activating_nucleation-promoting_factor_(NPF)_mediates_the_formation_of_branched_actin_networks_(By_similarity)
MvSl-1064-A1-R4_A1g00153	BLACK	noDE	no positive selection	ENOG410917H	Pfam:DUF1605
MvSl-1064-A1-R4_A1g00154	BLACK	noDE	no positive selection	ENOG41094G9	Peptidyl-tRNA_hydrolase
MvSl-1064-A1-R4_A1g00155	BLACK	noDE	no positive selection	ENOG4109374	Mur_ligase_middle_domain
MvSl-1064-A1-R4_A1g00175	PURPLE	noDE	no positive selection	ENOG41091P7	atypical_ABC1_ABC1-A_protein_kinase
MvSl-1064-A1-R4_A1g00184	BLACK	noDE	no positive selection	ENOG41093Y8	mitochondrial_37S_ribosomal_protein_RSM19
MvSl-1064-A1-R4_A1g00185	BLACK	noDE	no positive selection	ENOG41092IM	Protein_of_unknown_function_(DUF1620)
MvSl-1064-A1-R4_A1g00186	BLACK	noDE	no positive selection	ENOG41092W8	Oligosaccharyltransferase_48_kDa_subunit_beta
MvSl-1064-A1-R4_A1g00241	BLACK	noDE	no positive selection	ENOG41092T3	Cellulase_(glycosyl_hydrolase_family_5)
MvSl-1064-A1-R4_A1g00242	BLACK	noDE	no positive selection	ENOG41094AU	Signal_peptidase_subunit
MvSl-1064-A1-R4_A1g00246	BLACK	noDE	no positive selection	ENOG41092YR	Pantoate-beta-alanine_ligase
MvSl-1064-A1-R4_A1g00254	BLACK	noDE	no positive selection	ENOG41093FM	Involved_in_inositol_deacylation_of_GPI-anchored_proteins_which_plays_important_roles_in_the_quality_control_and_ER-associated_degradation_of_GPI-anchored_proteins_(By_similarity)
MvSl-1064-A1-R4_A1g00269	BLACK	noDE	no positive selection	ENOG410923J	Lon_protease_(S16)_C-terminal_proteolytic_domain
MvSl-1064-A1-R4_A1g00280	BLACK	noDE	no positive selection	ENOG4109294	Munc13_(mammalian_uncoordinated)_homology_domain
MvSl-1064-A1-R4_A1g00290	BLACK	noDE	no positive selection	ENOG41091WB	Domain_of_unknown_function_DUF221
MvSl-1064-A1-R4_A1g00306	PURPLE	noDE	no positive selection	ENOG41093DZ	pheromone_receptor
MvSl-1064-A1-R4_A1g00307	ORANGE	noDE	no positive selection	ENOG41093GT	ribosomal_protein
MvSl-1064-A1-R4_A1g00311	BLACK	noDE	no positive selection	ENOG41091C9	Kelch_motif
MvSl-1064-A1-R4_A1g00312	BLACK	noDE	no positive selection	ENOG410947Z	Essential_protein_Yae1,_N_terminal
MvSl-1064-A1-R4_A1g00326	BLACK	noDE	no positive selection	ENOG41092I3	Kex_protein
MvSl-1064-A1-R4_A1g00327	BLACK	noDE	no positive selection	ENOG41094KI	Inherit_from_fuNOG:_conserved_hypothetical_protein
MvSl-1064-A1-R4_A1g00328	BLACK	noDE	no positive selection	ENOG41097KX	NA
MvSl-1064-A1-R4_A1g00351	BLACK	noDE	no positive selection	ENOG41094NT	Ubiquitin_carboxyl-terminal_hydrolase
MvSl-1064-A1-R4_A1g00352	BLACK	noDE	no positive selection	ENOG41093YF	Inherit_from_opiNOG:_transcription_initiation_factor
MvSl-1064-A1-R4_A1g00367	RED	noDE	no positive selection	ENOG41098JI	Major_Facilitator_Superfamily
MvSl-1064-A1-R4_A1g00368	RED	noDE	no positive selection	ENOG41092A3	tRNA_(guanine-N7-)-methyltransferase_activity
MvSl-1064-A1-R4_A1g00369	RED	noDE	no positive selection	ENOG41091JK	Aldehyde_dehydrogenase_family
MvSl-1064-A1-R4_A1g00370	RED	noDE	no positive selection	ENOG41092M5	Gaa1-like,_GPI_transamidase_component
MvSl-1064-A1-R4_A1g00371	RED	noDE	no positive selection	ENOG41095BU	Fungal_specific_transcription_factor_domain
MvSl-1064-A1-R4_A1g00372	RED	noDE	no positive selection	ENOG410912E	tRNA_synthetases_class_I_(E_and_Q),_anti-codon_binding_domain
MvSl-1064-A1-R4_A1g00373	RED	noDE	no positive selection	ENOG41092NY	3'_exoribonuclease_family,_domain_1
MvSl-1064-A1-R4_A1g00374	RED	noDE	no positive selection	ENOG41092G2	acyl-coenzyme_A_oxidase
MvSl-1064-A1-R4_A1g00390	RED	noDE	no positive selection	ENOG41097Y7	NA
MvSl-1064-A1-R4_A1g00395	RED	noDE	no positive selection	ENOG41091N3	E1-E2_ATPase
MvSl-1064-A1-R4_A1g00396	RED	noDE	no positive selection	ENOG41093FI	Protein_tyrosine_phosphatase-like_protein,_PTPLA
MvSl-1064-A1-R4_A1g00397	RED	noDE	no positive selection	ENOG41094Q9	Mitochondrial_ATPase_inhibitor,_IATP
MvSl-1064-A1-R4_A1g00400	RED	noDE	no positive selection	ENOG410924N	TKL_LISK_LISK-DD1_protein_kinase
MvSl-1064-A1-R4_A1g00402	RED	noDE	no positive selection	ENOG41093BB	May_act_as_a_negative_regulator_of_salt_tolerance_(By_similarity)
MvSl-1064-A1-R4_A1g00403	RED	noDE	no positive selection	ENOG41091DU	DNA-directed_RNA_polymerase
MvSl-1064-A1-R4_A1g00404	RED	noDE	no positive selection	ENOG410946Q	Methyltransferase_domain
MvSl-1064-A1-R4_A1g00406	RED	noDE	no positive selection	ENOG41094BB	Ribosomal_protein_S16
MvSl-1064-A1-R4_A1g00432	BLACK	noDE	no positive selection	ENOG410946M	DNA-binding_protein_that_induces_severe_bending_of_DNA._Required_for_DNA-binding_by_the_FACT_complex,_a_general_chromatin_factor_that_acts_to_reorganize_nucleosomes._The_FACT_complex_is_involved_in_multiple_processes_that_require_DNA_as_a_template_such_as_mRNA_elongation,_DNA_replication_and_DNA_repair._Also_augments_the_fidelity_of_transcription_by_RNA_polymerase_III_independently_of_any_role_in…
MvSl-1064-A1-R4_A1g00441	ORANGE	noDE	no positive selection	ENOG41091GY	RPOLD
MvSl-1064-A1-R4_A1g00448	BLACK	noDE	no positive selection	ENOG4109552	Inherit_from_fuNOG:_transcription_factor_RfeF
MvSl-1064-A1-R4_A1g00495	BLUE	noDE	no positive selection	ENOG41094C6	NA
MvSl-1064-A1-R4_A1g00503	BLACK	noDE	no positive selection	ENOG410947S	NA
MvSl-1064-A1-R4_A1g00509	BLACK	noDE	no positive selection	ENOG41094TM	Phosphatidylserine_decarboxylase
MvSl-1064-A1-R4_A1g00510	BLACK	noDE	no positive selection	ENOG410944B	Uroporphyrinogen-III_synthase_HemD
MvSl-1064-A1-R4_A1g00511	BLACK	noDE	no positive selection	ENOG4109258	Mitochondrial_carrier_protein
MvSl-1064-A1-R4_A1g00512	BLACK	noDE	no positive selection	ENOG410936D	Got1/Sft2-like_family
MvSl-1064-A1-R4_A1g00514	BLACK	noDE	no positive selection	ENOG41095BH	Domain_of_unknown_function_(DUF1708)
MvSl-1064-A1-R4_A1g00517	BLACK	noDE	no positive selection	ENOG41094PP	Pfam:Drmip_Hesp
MvSl-1064-A1-R4_A1g00518	BLACK	noDE	no positive selection	ENOG4109387	NA
MvSl-1064-A1-R4_A1g00519	BLACK	noDE	no positive selection	ENOG410941X	Zinc_finger,_C3HC4_type_(RING_finger)
MvSl-1064-A1-R4_A1g00520	BLACK	noDE	no positive selection	ENOG41095JA	MULE_transposase_domain
MvSl-1064-A1-R4_A1g00522	BLACK	noDE	no positive selection	ENOG41095ZV	Major_Facilitator_Superfamily
MvSl-1064-A1-R4_A1g00525	BLACK	noDE	no positive selection	ENOG41096MC	SAP
MvSl-1064-A1-R4_A1g00532	BLACK	noDE	no positive selection	NA	NA
MvSl-1064-A1-R4_A1g00533	BLACK	noDE	no positive selection	ENOG41093JM	Fumarylacetoacetate_(FAA)_hydrolase_family
MvSl-1064-A1-R4_A1g00542	BLACK	noDE	no positive selection	ENOG4109137	rADc
MvSl-1064-A1-R4_A1g00543	BLACK	noDE	no positive selection	ENOG41091N6	Clathrin_binding_protein
MvSl-1064-A1-R4_A1g00544	BLACK	noDE	no positive selection	ENOG41092Q9	D-arabinono-1,4-lactone_oxidase
MvSl-1064-A1-R4_A1g00575	BLACK	noDE	no positive selection	ENOG410913W	Cid1_family_poly_A_polymerase
MvSl-1064-A1-R4_A1g00576	BLACK	noDE	no positive selection	NA	NA
MvSl-1064-A1-R4_A1g00591	BLUE	noDE	no positive selection	ENOG41098KS	Pfam:Coprinus_mating
MvSl-1064-A1-R4_A1g00592	BLUE	noDE	no positive selection	ENOG41095X0	Homeobox_domain
MvSl-1064-A1-R4_A1g00624	PURPLE	noDE	no positive selection	ENOG41093R2	endonuclease_activity
MvSl-1064-A1-R4_A1g00644	BLACK	noDE	no positive selection	ENOG41094DI	ZnF_C3H1
MvSl-1064-A1-R4_A1g00645	BLACK	noDE	no positive selection	ENOG410956Q	GAL4
MvSl-1064-A1-R4_A1g00646	BLACK	noDE	no positive selection	ENOG41092QD	PGAP1-like_protein
MvSl-1064-A1-R4_A1g00647	BLACK	noDE	no positive selection	ENOG41095JU	Peptidase_of_plants_and_bacteria
MvSl-1064-A1-R4_A1g00648	BLACK	noDE	no positive selection	ENOG4109381	Pre-mRNA-splicing_factor_CWC25
MvSl-1064-A1-R4_A1g00668	ORANGE	noDE	no positive selection	ENOG41092GX	NA
MvSl-1064-A1-R4_A1g00669	ORANGE	noDE	no positive selection	ENOG41092IB	EAP30/Vps36_family
MvSl-1064-A1-R4_A1g00693	BLACK	noDE	no positive selection	ENOG41092IX	Catalyzes_the_oxidation_of_uric_acid_to_5-_hydroxyisourate,_which_is_further_processed_to_form_(S)-allantoin_(By_similarity)
MvSl-1064-A1-R4_A1g00694	BLACK	noDE	no positive selection	ENOG41093PV	MADS
MvSl-1064-A1-R4_A1g00718	BLACK	noDE	no positive selection	ENOG41098KQ	Glycosyltransferase_sugar-binding_region_containing_DXD_motif
MvSl-1064-A1-R4_A1g00732	BLACK	noDE	no positive selection	ENOG410926C	Domain_of_Unknown_Function_(DUF913)
MvSl-1064-A1-R4_A1g00749	BLACK	noDE	no positive selection	NA	NA
MvSl-1064-A1-R4_A1g00750	BLACK	noDE	no positive selection	NA	NA
MvSl-1064-A1-R4_A1g00751	BLACK	noDE	no positive selection	ENOG410983T	Inherit_from_fuNOG:_HSP70_family
MvSl-1064-A1-R4_A1g00755	BLACK	noDE	no positive selection	ENOG41098PD	SH3
MvSl-1064-A1-R4_A1g00778	BLACK	noDE	no positive selection	ENOG41093FW	Primase_zinc_finger
MvSl-1064-A1-R4_A1g00779	BLACK	noDE	no positive selection	ENOG41091W6	Vacuolar_protein_sorting-associated_protein_35
MvSl-1064-A1-R4_A1g00801	BLUE	noDE	no positive selection	ENOG41094P0	Sas10/Utp3/C1D_family
MvSl-1064-A1-R4_A1g00807	BLUE	noDE	no positive selection	NA	NA
MvSl-1064-A1-R4_A1g00832	BLACK	noDE	no positive selection	ENOG41091FX	Regulatory_subunit_of_the_poly(A)-nuclease_(PAN)_deadenylation_complex_involved_in_cytoplasmic_mRNA_turnover._PAN_specifically_shortens_poly(A)_tails_of_RNA_when_the_poly(A)_stretch_is_bound_by_polyadenylate-binding_protein_PAB1._Deadenylation_of_the_3'-tail_to_a_length_that_is_too_short_to_bind_PAB1_induces_mRNA_decay._May_also_be_involved_in_post-_transcriptional_maturation_of_mRNA_poly(A)_tail…
MvSl-1064-A1-R4_A1g00840	BLACK	noDE	no positive selection	ENOG41099CW	PB1_domain
MvSl-1064-A1-R4_A1g00842	BLACK	noDE	no positive selection	ENOG41093ZE	Inherit_from_COG:_alpha_beta_hydrolase_fold-3_domain_protein
MvSl-1064-A1-R4_A1g00843	BLACK	noDE	no positive selection	ENOG41093EZ	Squalene/phytoene_synthase
MvSl-1064-A1-R4_A1g00844	BLACK	noDE	no positive selection	ENOG41095S5	NA
MvSl-1064-A1-R4_A1g00845	BLACK	noDE	no positive selection	ENOG410999S	RasGEF_N-terminal_motif
MvSl-1064-A1-R4_A1g00853	PURPLE	noDE	no positive selection	ENOG41091T4	STE_STE20_PAKA_protein_kinase
MvSl-1064-A1-R4_A1g00854	PURPLE	noDE	no positive selection	ENOG41092D0	Importin-beta_N-terminal_domain
MvSl-1064-A1-R4_A1g00868	BLACK	noDE	no positive selection	NA	NA
MvSl-1064-A1-R4_A1g00869	BLACK	noDE	no positive selection	ENOG41099AP	FGGY_family_of_carbohydrate_kinases,_C-terminal_domain
MvSl-1064-A1-R4_A1g00912	BLACK	noDE	no positive selection	ENOG41092RV	SCO1/SenC
MvSl-1064-A1-R4_A1g00913	BLACK	noDE	no positive selection	ENOG410913R	Inherit_from_euNOG:_Anucleate_primary_sterigmata
MvSl-1064-A1-R4_A1g00920	BLACK	noDE	no positive selection	ENOG41094NB	NA
MvSl-1064-A1-R4_A1g00922	BLACK	noDE	no positive selection	ENOG41095KI	NA
MvSl-1064-A1-R4_A1g00956	BLACK	noDE	no positive selection	ENOG41095CT	NA
MvSl-1064-A1-R4_A1g00957	BLACK	noDE	no positive selection	ENOG4109484	Component_of_the_EKC_KEOPS_complex_which_promotes_both_telomere_uncapping_and_telomere_elongation_(By_similarity)._The_complex_is_required_for_efficient_recruitment_of_transcriptional_coactivators_(By_similarity)
MvSl-1064-A1-R4_A1g00958	BLACK	noDE	no positive selection	ENOG41092R1	Actin
MvSl-1064-A1-R4_A1g00960	BLACK	noDE	no positive selection	ENOG41092VY	charged_multivesicular_body_protein_5
MvSl-1064-A1-R4_A1g00971	BLUE	noDE	no positive selection	ENOG41095MV	PAP2_superfamily
MvSl-1064-A1-R4_A1g00972	BLUE	noDE	no positive selection	ENOG41095HF	NA
MvSl-1064-A1-R4_A1g00998	BLUE	noDE	no positive selection	ENOG41092TI	Ribosomal_protein_S4/S9_N-terminal_domain
MvSl-1064-A1-R4_A1g01022	BLACK	noDE	no positive selection	ENOG410940R	Zinc-finger_of_the_MIZ_type_in_Nse_subunit
MvSl-1064-A1-R4_A1g01127	BLACK	noDE	no positive selection	NA	NA
MvSl-1064-A1-R4_A1g01137	BLACK	noDE	no positive selection	ENOG41097N4	NA
MvSl-1064-A1-R4_A1g01154	BLUE	noDE	no positive selection	ENOG41094AD	Tim17/Tim22/Tim23/Pmp24_family
MvSl-1064-A1-R4_A1g01159	BLUE	noDE	no positive selection	ENOG41094M5	bZIP_transcription_factor
MvSl-1064-A1-R4_A1g01160	BLUE	noDE	no positive selection	ENOG41091N7	PAM
MvSl-1064-A1-R4_A1g01161	BLUE	noDE	no positive selection	ENOG4109301	Mitochondrial_carrier_protein
MvSl-1064-A1-R4_A1g01163	BLUE	noDE	no positive selection	ENOG410931M	Signal_recognition_particle_receptor_beta_subunit
MvSl-1064-A1-R4_A1g01164	BLACK	noDE	no positive selection	ENOG4109574	NA
MvSl-1064-A1-R4_A1g01189	BLACK	noDE	no positive selection	ENOG41094AZ	Helix-loop-helix_DNA-binding_domain
MvSl-1064-A1-R4_A1g01212	BLACK	noDE	no positive selection	ENOG410928I	DNA_replication_licensing_factor_cdc19
MvSl-1064-A1-R4_A1g01219	BLACK	noDE	no positive selection	ENOG4109367	Putative_stress-responsive_nuclear_envelope_protein
MvSl-1064-A1-R4_A1g01220	BLACK	noDE	no positive selection	ENOG41099CK	LIM_domain
MvSl-1064-A1-R4_A1g01252	ORANGE	noDE	no positive selection	ENOG41095UD	NA
MvSl-1064-A1-R4_A1g01253	ORANGE	noDE	no positive selection	ENOG4109307	Prefoldin_subunit
MvSl-1064-A1-R4_A1g01261	ORANGE	noDE	no positive selection	ENOG41093AN	NA
MvSl-1064-A1-R4_A1g01272	BLACK	noDE	no positive selection	ENOG410939P	B-cell_receptor-associated_protein_31-like
MvSl-1064-A1-R4_A1g01348	BLACK	noDE	no positive selection	ENOG410932D	DSPc
MvSl-1064-A1-R4_A1g01350	BLACK	noDE	no positive selection	ENOG41093AC	Inherit_from_fuNOG:_Calcium_channel
MvSl-1064-A1-R4_A1g01366	BLACK	noDE	no positive selection	ENOG41098DR	Bromodomain_associated
MvSl-1064-A1-R4_A1g01367	BLACK	noDE	no positive selection	ENOG41094CG	Uracil_DNA_glycosylase_superfamily
MvSl-1064-A1-R4_A1g01368	BLACK	noDE	no positive selection	ENOG41093EU	Mus7/MMS22_family
MvSl-1064-A1-R4_A1g01384	BLACK	noDE	no positive selection	ENOG41094JU	Fes/CIP4,_and_EFC/F-BAR_homology_domain
MvSl-1064-A1-R4_A1g01389	BLACK	noDE	no positive selection	ENOG41094SF	BROMO
MvSl-1064-A1-R4_A1g01392	BLACK	noDE	no positive selection	NA	NA
MvSl-1064-A1-R4_A1g01393	BLACK	noDE	no positive selection	NA	NA
MvSl-1064-A1-R4_A1g01405	BLACK	noDE	no positive selection	ENOG41095EN	Inherit_from_opiNOG:_AlkB,_alkylation_repair_homolog_6_(E._coli)
MvSl-1064-A1-R4_A1g01407	BLACK	noDE	no positive selection	ENOG410955X	Inherit_from_fuNOG:_integral_membrane_protein
MvSl-1064-A1-R4_A1g01431	BLUE	noDE	no positive selection	ENOG41091AT	Kinesin_protein
MvSl-1064-A1-R4_A1g01440	PAR	noDE	no positive selection	ENOG41091WH	autophagy
MvSl-1064-A1-R4_A1g01441	PAR	noDE	no positive selection	ENOG41095KT	Zinc_finger,_C3HC4_type_(RING_finger)
MvSl-1064-A1-R4_A1g01444	PAR	noDE	no positive selection	ENOG410911I	Occurs_in_almost_all_aerobically_respiring_organisms_and_serves_to_protect_cells_from_the_toxic_effects_of_hydrogen_peroxide_(By_similarity)
MvSl-1064-A1-R4_A1g01445	PAR	noDE	no positive selection	ENOG41094HA	NA
MvSl-1064-A1-R4_A1g01446	PAR	noDE	no positive selection	NA	NA
MvSl-1064-A1-R4_A1g01447	PAR	noDE	no positive selection	ENOG41094P1	NA
MvSl-1064-A1-R4_A1g01450	PAR	noDE	no positive selection	ENOG41098G0	His_Kinase_A_(phospho-acceptor)_domain
MvSl-1064-A1-R4_A1g01451	PAR	noDE	no positive selection	ENOG410945U	SMP-30/Gluconolaconase/LRE-like_region
MvSl-1064-A1-R4_A1g01453	PAR	noDE	no positive selection	ENOG41094SU	Sugar_(and_other)_transporter
MvSl-1064-A1-R4_A1g01456	PAR	noDE	no positive selection	ENOG41091SB	DNA-directed_RNA_polymerase
MvSl-1064-A1-R4_A1g01457	PAR	noDE	no positive selection	NA	NA
MvSl-1064-A1-R4_A1g01458	PAR	noDE	no positive selection	ENOG41091SB	DNA-directed_RNA_polymerase
MvSl-1064-A1-R4_A1g01459	PAR	noDE	no positive selection	NA	NA
MvSl-1064-A1-R4_A1g01460	PAR	noDE	no positive selection	ENOG41093VN	NA
MvSl-1064-A1-R4_A1g01461	PAR	noDE	no positive selection	ENOG41094DV	Ribosomal_protein_L17
MvSl-1064-A1-R4_A1g01462	PAR	noDE	no positive selection	ENOG41092QF	Ubiquitin_interaction_motif
MvSl-1064-A1-R4_A1g01465	PAR	noDE	no positive selection	NA	NA
MvSl-1064-A1-R4_A1g01466	PAR	noDE	no positive selection	ENOG410941U	PPR_repeat
MvSl-1064-A1-R4_A1g01468	PAR	noDE	no positive selection	ENOG41097S6	NA
MvSl-1064-A1-R4_A1g01471	PAR	noDE	no positive selection	ENOG4109431	Transcription_initiation_factor_TFIID_component_TAF4_family
MvSl-1064-A1-R4_A1g01472	PAR	noDE	no positive selection	ENOG4109490	Transcription_initiation_factor_IID,_31kD_subunit
MvSl-1064-A1-R4_A1g01473	PAR	noDE	no positive selection	ENOG41095M6	NA
MvSl-1064-A1-R4_A1g01477	PAR	noDE	no positive selection	ENOG410931Z	Pfam:DUF654
MvSl-1064-A1-R4_A1g01485	PAR	noDE	no positive selection	ENOG410917V	K09523_DnaJ_homolog_subfamily_C_member_3
MvSl-1064-A1-R4_A1g01486	PAR	noDE	no positive selection	ENOG410982F	von_Willebrand_factor_type_A_domain
MvSl-1064-A1-R4_A1g01487	PAR	noDE	no positive selection	ENOG41095G0	Protein_of_unknown_function_(DUF3292)
MvSl-1064-A1-R4_A1g01488	PAR	noDE	no positive selection	ENOG41091AZ	Protein_of_unknown_function_(DUF3591)
MvSl-1064-A1-R4_A1g01491	PAR	noDE	no positive selection	NA	NA
MvSl-1064-A1-R4_A1g01497	PAR	noDE	no positive selection	ENOG410939T	EFh
MvSl-1064-A1-R4_A1g01498	PAR	noDE	no positive selection	ENOG41093C6	Ion_transport_protein
MvSl-1064-A1-R4_A1g01500	PAR	noDE	no positive selection	ENOG410924Y	MIF4G_like
MvSl-1064-A1-R4_A1g01508	PAR	noDE	no positive selection	ENOG41093E2	Integral_peroxisomal_membrane_peroxin
MvSl-1064-A1-R4_A1g01509	PAR	noDE	no positive selection	ENOG41092EB	Provides_the_precursors_necessary_for_DNA_synthesis._Catalyzes_the_biosynthesis_of_deoxyribonucleotides_from_the_corresponding_ribonucleotides_(By_similarity)
MvSl-1064-A1-R4_MC01-1g01701	AUTOSOME	noDE	no positive selection	ENOG41096MU	other_FunK1_protein_kinase
MvSl-1064-A1-R4_MC01-1g01708	AUTOSOME	noDE	no positive selection	ENOG410941S	Inherit_from_KOG:_coiled-coil-helix-coiled-coil-helix_domain_containing
MvSl-1064-A1-R4_MC01-1g01709	AUTOSOME	noDE	no positive selection	ENOG41092WU	Ankyrin_repeat
MvSl-1064-A1-R4_MC01-1g01711	AUTOSOME	noDE	no positive selection	ENOG41092KC	Nucleoporin_Nup120/160
MvSl-1064-A1-R4_MC01-1g01712	AUTOSOME	noDE	no positive selection	ENOG410934S	short_chain_dehydrogenase
MvSl-1064-A1-R4_MC01-1g01716	AUTOSOME	noDE	no positive selection	NA	NA
MvSl-1064-A1-R4_MC01-1g01725	AUTOSOME	noDE	no positive selection	ENOG410937Z	EXS_family
MvSl-1064-A1-R4_MC01-1g01726	AUTOSOME	noDE	no positive selection	ENOG41093GR	PHD
MvSl-1064-A1-R4_MC01-1g01729	AUTOSOME	noDE	no positive selection	ENOG41095R4	NA
MvSl-1064-A1-R4_MC01-1g01730	AUTOSOME	noDE	no positive selection	ENOG41097KM	NA
MvSl-1064-A1-R4_MC01-1g01732	AUTOSOME	noDE	no positive selection	NA	NA
MvSl-1064-A1-R4_MC01-1g01733	AUTOSOME	noDE	no positive selection	NA	NA
MvSl-1064-A1-R4_MC01-1g01735	AUTOSOME	noDE	no positive selection	ENOG41092F5	NGP1NT_(NUC091)_domain
MvSl-1064-A1-R4_MC01-1g01743	AUTOSOME	noDE	no positive selection	ENOG41097RD	NA
MvSl-1064-A1-R4_MC01-1g01744	AUTOSOME	noDE	no positive selection	ENOG41090Z7	Aminopeptidase_I_zinc_metalloprotease_(M18)
MvSl-1064-A1-R4_MC01-1g01748	AUTOSOME	noDE	no positive selection	ENOG41094P9	Anticodon-binding_domain
MvSl-1064-A1-R4_MC01-1g01751	AUTOSOME	noDE	no positive selection	ENOG41091FF	N1221-like_protein
MvSl-1064-A1-R4_MC01-1g01752	AUTOSOME	noDE	no positive selection	ENOG41093ZB	mitochondrial_37S_ribosomal_protein_MRPS8
MvSl-1064-A1-R4_MC01-1g01754	AUTOSOME	noDE	no positive selection	ENOG41093GC	Component_of_the_SWR1_complex_which_mediates_the_ATP-_dependent_exchange_of_histone_H2A_for_the_H2A_variant_HZT1_leading_to_transcriptional_regulation_of_selected_genes_by_chromatin_remodeling._Component_of_the_NuA4_histone_acetyltransferase_complex_which_is_involved_in_transcriptional_activation_of_selected_genes_principally_by_acetylation_of_nucleosomal_histones_H4_and_H2A._The_NuA4_complex_is_…
MvSl-1064-A1-R4_MC01-1g01755	AUTOSOME	noDE	no positive selection	ENOG41093KX	Mitochondrial_ribosomal_small_subunit
MvSl-1064-A1-R4_MC01-1g01756	AUTOSOME	noDE	no positive selection	ENOG41091DI	Conserved_hypothetical_ATP_binding_protein
MvSl-1064-A1-R4_MC01-1g01766	AUTOSOME	noDE	no positive selection	ENOG41095AQ	Major_Facilitator_Superfamily
MvSl-1064-A1-R4_MC01-1g01767	AUTOSOME	noDE	no positive selection	ENOG410931I	Rft_protein
MvSl-1064-A1-R4_MC01-1g01768	AUTOSOME	noDE	no positive selection	ENOG41091UP	Tetratricopeptide_repeat
MvSl-1064-A1-R4_MC01-1g01769	AUTOSOME	noDE	no positive selection	ENOG410933J	Inherit_from_fuNOG:_Zn-dependent_hydrolase_oxidoreductase_family_protein
MvSl-1064-A1-R4_MC01-1g01771	AUTOSOME	noDE	no positive selection	ENOG41092Q8	Bin/amphiphysin/Rvs_domain_for_vesicular_trafficking
MvSl-1064-A1-R4_MC01-1g01778	AUTOSOME	noDE	no positive selection	ENOG41094H1	NA
MvSl-1064-A1-R4_MC01-1g01780	AUTOSOME	noDE	no positive selection	ENOG41093Z8	ESCRT-II_complex_subunit
MvSl-1064-A1-R4_MC01-1g01796	AUTOSOME	noDE	no positive selection	ENOG41091Y0	Peptidase_family_M48
MvSl-1064-A1-R4_MC01-1g01799	AUTOSOME	noDE	no positive selection	ENOG41095JR	NA
MvSl-1064-A1-R4_MC01-1g01801	AUTOSOME	noDE	no positive selection	ENOG410939U	JmjC_domain,_hydroxylase
MvSl-1064-A1-R4_MC01-1g01802	AUTOSOME	noDE	no positive selection	ENOG41091BF	Patched_family
MvSl-1064-A1-R4_MC01-1g01804	AUTOSOME	noDE	no positive selection	ENOG4109100	AARP2CN_(NUC121)_domain
MvSl-1064-A1-R4_MC01-1g01805	AUTOSOME	noDE	no positive selection	ENOG41092Y2	Aldo/keto_reductase_family
MvSl-1064-A1-R4_MC01-1g01806	AUTOSOME	noDE	no positive selection	ENOG410930C	Domain_of_unknown_function_(DUF1708)
MvSl-1064-A1-R4_MC01-1g01807	AUTOSOME	noDE	no positive selection	ENOG41093XT	Platelet-activating_factor_acetylhydrolase,_isoform_II
MvSl-1064-A1-R4_MC01-1g01808	AUTOSOME	noDE	no positive selection	ENOG41093XT	Platelet-activating_factor_acetylhydrolase,_isoform_II
MvSl-1064-A1-R4_MC01-1g01809	AUTOSOME	noDE	no positive selection	ENOG41091XU	The_proteasome_is_a_multicatalytic_proteinase_complex_which_is_characterized_by_its_ability_to_cleave_peptides_with_Arg,_Phe,_Tyr,_Leu,_and_Glu_adjacent_to_the_leaving_group_at_neutral_or_slightly_basic_pH._The_proteasome_has_an_ATP-dependent_proteolytic_activity_(By_similarity)
MvSl-1064-A1-R4_MC01-1g01810	AUTOSOME	noDE	no positive selection	ENOG41095PR	Involved_in_mRNA_export_coupled_transcription_activation_by_association_with_both_the_TREX-2_and_the_SAGA_complexes._The_transcription_regulatory_histone_acetylation_(HAT)_complex_SAGA_is_a_multiprotein_complex_that_activates_transcription_by_remodeling_chromatin_and_mediating_histone_acetylation_and_deubiquitination._Within_the_SAGA_complex,_participates_in_a_subcomplex_that_specifically_deubiqu…
MvSl-1064-A1-R4_MC01-1g01812	AUTOSOME	noDE	no positive selection	ENOG410942U	ZnF_C2H2
MvSl-1064-A1-R4_MC01-1g01813	AUTOSOME	noDE	no positive selection	ENOG41092BT	Phosphatidylinositolglycan_class_N_(PIG-N)
MvSl-1064-A1-R4_MC01-1g01814	AUTOSOME	noDE	no positive selection	ENOG41095UM	NA
MvSl-1064-A1-R4_MC01-1g01815	AUTOSOME	noDE	no positive selection	ENOG41090ZN	E1-E2_ATPase
MvSl-1064-A1-R4_MC01-1g01816	AUTOSOME	noDE	no positive selection	ENOG410928E	Aldehyde_dehydrogenase_family
MvSl-1064-A1-R4_MC01-1g01817	AUTOSOME	noDE	no positive selection	ENOG41091P2	Mitochondrial_inner_membrane_protein
MvSl-1064-A1-R4_MC01-1g01818	AUTOSOME	noDE	no positive selection	ENOG41093QB	HPP_family
MvSl-1064-A1-R4_MC01-1g01819	AUTOSOME	noDE	no positive selection	ENOG410926Y	Indigoidine_synthase_A_like_protein
MvSl-1064-A1-R4_MC01-1g01821	AUTOSOME	noDE	no positive selection	ENOG41093EP	Eukaryotic_protein_of_unknown_function_(DUF846)
MvSl-1064-A1-R4_MC01-1g01822	AUTOSOME	noDE	no positive selection	ENOG41091H0	Endoplasmic_reticulum_protein
MvSl-1064-A1-R4_MC01-1g01823	AUTOSOME	noDE	no positive selection	NA	NA
MvSl-1064-A1-R4_MC01-1g01824	AUTOSOME	noDE	no positive selection	ENOG410938P	Pfam:aPHC
MvSl-1064-A1-R4_MC01-1g01825	AUTOSOME	noDE	no positive selection	ENOG410938P	Pfam:aPHC
MvSl-1064-A1-R4_MC01-1g01826	AUTOSOME	noDE	no positive selection	ENOG41095C3	NA
MvSl-1064-A1-R4_MC01-1g01834	AUTOSOME	noDE	no positive selection	ENOG41097AC	NA
MvSl-1064-A1-R4_MC01-1g01840	AUTOSOME	noDE	no positive selection	ENOG41095C3	NA
MvSl-1064-A1-R4_MC01-1g01841	AUTOSOME	noDE	no positive selection	ENOG41093GH	ArfGap
MvSl-1064-A1-R4_MC01-1g01843	AUTOSOME	noDE	no positive selection	ENOG41092VG	cytochrome_p450
MvSl-1064-A1-R4_MC01-1g01845	AUTOSOME	noDE	no positive selection	ENOG41091MN	Mitochondrial_carrier_protein
MvSl-1064-A1-R4_MC01-1g01846	AUTOSOME	noDE	no positive selection	ENOG41091I2	Ion_transport_protein
MvSl-1064-A1-R4_MC01-1g01847	AUTOSOME	noDE	no positive selection	ENOG41096FY	Berberine_and_berberine_like
MvSl-1064-A1-R4_MC01-1g01850	AUTOSOME	noDE	no positive selection	ENOG41095DD	RNA_pseudouridylate_synthase
MvSl-1064-A1-R4_MC01-1g01851	AUTOSOME	noDE	no positive selection	ENOG41093GW	Component_of_the_NuA4_histone_acetyltransferase_complex_which_is_involved_in_transcriptional_activation_of_selected_genes_principally_by_acetylation_of_nucleosomal_histone_H4_and_H2A._The_NuA4_complex_is_also_involved_in_DNA_repair_(By_similarity)
MvSl-1064-A1-R4_MC01-1g01853	AUTOSOME	noDE	no positive selection	ENOG41093G6	WD40
MvSl-1064-A1-R4_MC01-1g01854	AUTOSOME	noDE	no positive selection	ENOG410915V	Fn3-like_domain_(DUF1034)
MvSl-1064-A1-R4_MC01-1g01855	AUTOSOME	noDE	no positive selection	ENOG410927K	CAMK_CAMKL_AMPK_protein_kinase
MvSl-1064-A1-R4_MC01-1g01856	AUTOSOME	noDE	no positive selection	ENOG41093YU	Vacuolar_protein_sorting_55
MvSl-1064-A1-R4_MC01-1g01857	AUTOSOME	noDE	no positive selection	ENOG41096IN	NA
MvSl-1064-A1-R4_MC01-1g01859	AUTOSOME	noDE	no positive selection	ENOG410914F	Protein_of_unknown_function_(DUF3414)
MvSl-1064-A1-R4_MC01-1g01860	AUTOSOME	noDE	no positive selection	ENOG41093YP	NA
MvSl-1064-A1-R4_MC01-1g01861	AUTOSOME	noDE	no positive selection	ENOG410911P	Protein_tyrosine_kinase
MvSl-1064-A1-R4_MC01-1g01862	AUTOSOME	noDE	no positive selection	ENOG410938D	Translation_initiation_factor_SUI1
MvSl-1064-A1-R4_MC01-1g01863	AUTOSOME	noDE	no positive selection	ENOG41094QW	NA
MvSl-1064-A1-R4_MC01-1g01864	AUTOSOME	noDE	no positive selection	ENOG41095DB	NA
MvSl-1064-A1-R4_MC01-1g01865	AUTOSOME	noDE	no positive selection	NA	NA
MvSl-1064-A1-R4_MC01-1g01866	AUTOSOME	noDE	no positive selection	NA	NA
MvSl-1064-A1-R4_MC01-1g01868	AUTOSOME	noDE	no positive selection	ENOG41096YP	Inherit_from_fuNOG:_endonuclease_exonuclease_phosphatase_family_protein
MvSl-1064-A1-R4_MC01-1g01869	AUTOSOME	noDE	no positive selection	ENOG41094Q3	NA
MvSl-1064-A1-R4_MC01-1g01870	AUTOSOME	noDE	no positive selection	ENOG41092BU	Temperature_dependent_protein_affecting_M2_dsRNA_replication
MvSl-1064-A1-R4_MC01-1g01871	AUTOSOME	noDE	no positive selection	ENOG41098XT	HDc
MvSl-1064-A1-R4_MC01-1g01872	AUTOSOME	noDE	no positive selection	ENOG41094S1	NA
MvSl-1064-A1-R4_MC01-1g01873	AUTOSOME	noDE	no positive selection	ENOG41091S9	Component_of_the_post-replicative_DNA_mismatch_repair_system_(MMR)._Heterodimerizes_with_MSH2_to_form_MutS_beta,_which_binds_to_DNA_mismatches_thereby_initiating_DNA_repair._MSH3_provides_substrate-binding_and_substrate-specificity_to_the_complex._When_bound,_the_MutS_beta_heterodimer_bends_the_DNA_helix_and_shields_approximately_20_base_pairs._Acts_mainly_to_repair_insertion-deletion_loops_(IDLs…
MvSl-1064-A1-R4_MC01-1g01874	AUTOSOME	noDE	no positive selection	ENOG41092ZR	Component_of_the_SWR1_complex_which_mediates_the_ATP-_dependent_exchange_of_histone_H2A_for_the_H2A_variant_HZT1_leading_to_transcriptional_regulation_of_selected_genes_by_chromatin_remodeling._Component_of_the_NuA4_histone_acetyltransferase_complex_which_is_involved_in_transcriptional_activation_of_selected_genes_principally_by_acetylation_of_nucleosomal_histone_H4_and_H2A._The_NuA4_complex_is_a…
MvSl-1064-A1-R4_MC01-1g01875	AUTOSOME	noDE	no positive selection	NA	NA
MvSl-1064-A1-R4_MC01-1g01876	AUTOSOME	noDE	no positive selection	ENOG41096Z3	NA
MvSl-1064-A1-R4_MC01-1g01878	AUTOSOME	noDE	no positive selection	ENOG41093HX	RibD_C-terminal_domain
MvSl-1064-A1-R4_MC01-1g01880	AUTOSOME	noDE	no positive selection	ENOG4109590	Rare_lipoprotein_A_(RlpA)-like_double-psi_beta-barrel
MvSl-1064-A1-R4_MC01-1g01881	AUTOSOME	noDE	no positive selection	ENOG41094ZB	AMP-binding_enzyme
MvSl-1064-A1-R4_MC01-1g01884	AUTOSOME	noDE	no positive selection	ENOG41091QB	Inherit_from_fuNOG:_Highly_specific_D-xylulose_kinase_which_participates_in_the_catabolism_of_xylose._Xylose_is_a_major_component_of_hemicelluloses_such_as_xylan._Most_fungi_utilize_D-xylose_via_three_enzymatic_reactions,_xylose_reductase_(XR),_xylitol_dehydrogenase_(XDH),_and_xylulokinase,_to_form_xylulose_5-_phosphate,_which_enters_pentose_phosphate_pathway_(By_similarity)
MvSl-1064-A1-R4_MC01-1g01885	AUTOSOME	noDE	no positive selection	ENOG41091IK	Fungal_trans
MvSl-1064-A1-R4_MC01-1g01886	AUTOSOME	noDE	no positive selection	ENOG410918D	UME_(NUC010)_domain
MvSl-1064-A1-R4_MC01-1g01890	AUTOSOME	noDE	no positive selection	ENOG41093VT	RasGEF_domain
MvSl-1064-A1-R4_MC01-1g01891	AUTOSOME	noDE	no positive selection	ENOG41094Q0	WD_domain,_G-beta_repeat
MvSl-1064-A1-R4_MC01-1g01892	AUTOSOME	noDE	no positive selection	ENOG41095ED	HMG_(high_mobility_group)_box
MvSl-1064-A1-R4_MC01-1g01893	AUTOSOME	noDE	no positive selection	ENOG4109480	Inherit_from_euNOG:_Cytokinesis_regulator_(Byr4)
MvSl-1064-A1-R4_MC01-1g01894	AUTOSOME	noDE	no positive selection	ENOG410922H	ubiquitin_carboxyl-terminal_hydrolase
MvSl-1064-A1-R4_MC01-1g01895	AUTOSOME	noDE	no positive selection	NA	NA
MvSl-1064-A1-R4_MC01-1g01896	AUTOSOME	noDE	no positive selection	ENOG41093XU	NA
MvSl-1064-A1-R4_MC01-1g01897	AUTOSOME	noDE	no positive selection	ENOG41092C4	SacI_homology_domain
MvSl-1064-A1-R4_MC01-1g01898	AUTOSOME	noDE	no positive selection	ENOG41095N6	DASH_complex_subunit_Hsk3_like
MvSl-1064-A1-R4_MC01-1g01900	AUTOSOME	noDE	no positive selection	ENOG41094Q4	G_patch
MvSl-1064-A1-R4_MC01-1g01901	AUTOSOME	noDE	no positive selection	ENOG41093DN	Inherit_from_fuNOG:_integral_membrane_protein
MvSl-1064-A1-R4_MC01-1g01902	AUTOSOME	noDE	no positive selection	NA	NA
MvSl-1064-A1-R4_MC01-1g01903	AUTOSOME	noDE	no positive selection	ENOG41094WM	Adenosine/AMP_deaminase
MvSl-1064-A1-R4_MC01-1g01904	AUTOSOME	noDE	no positive selection	ENOG410958U	Zinc-binding_dehydrogenase
MvSl-1064-A1-R4_MC01-1g01905	AUTOSOME	noDE	no positive selection	ENOG410918V	Transient_receptor_potential_(TRP)_ion_channel
MvSl-1064-A1-R4_MC01-1g01906	AUTOSOME	noDE	no positive selection	ENOG41091Y5	ATP-dependent_RNA_helicase_associated_with_the_nuclear_pore_complex_and_essential_for_mRNA_export_from_the_nucleus._May_participate_in_a_terminal_step_of_mRNA_export_through_the_removal_of_proteins_that_accompany_mRNA_through_the_nucleopore_complex._May_also_be_involved_in_early_transcription_(By_similarity)
MvSl-1064-A1-R4_MC01-1g01907	AUTOSOME	noDE	no positive selection	ENOG410927U	Protein_of_unknown_function_(DUF2421)
MvSl-1064-A1-R4_MC01-1g01912	AUTOSOME	noDE	no positive selection	ENOG41092BM	2-nitropropane_dioxygenase
MvSl-1064-A1-R4_MC01-1g01913	AUTOSOME	noDE	no positive selection	ENOG41091MC	TBC
MvSl-1064-A1-R4_MC01-1g01914	AUTOSOME	noDE	no positive selection	NA	NA
MvSl-1064-A1-R4_MC01-1g01915	AUTOSOME	noDE	no positive selection	ENOG41092A7	Glucose_inhibited_division_protein_A
MvSl-1064-A1-R4_MC01-1g01916	AUTOSOME	noDE	no positive selection	ENOG41091MV	NA
MvSl-1064-A1-R4_MC01-1g01918	AUTOSOME	noDE	no positive selection	ENOG410946V	Dual_specificity_phosphatase,_catalytic_domain
MvSl-1064-A1-R4_MC01-1g01919	AUTOSOME	noDE	no positive selection	ENOG41092C3	RAB
MvSl-1064-A1-R4_MC01-1g01921	AUTOSOME	noDE	no positive selection	ENOG41093AA	pyruvate_dehydrogenase_protein_X_component,_mitochondrial_precursor
MvSl-1064-A1-R4_MC01-1g01922	AUTOSOME	noDE	no positive selection	ENOG41097UX	NA
MvSl-1064-A1-R4_MC01-1g01923	AUTOSOME	noDE	no positive selection	ENOG41091Y1	Protein_of_unknown_function,_DUF258
MvSl-1064-A1-R4_MC01-1g01925	AUTOSOME	noDE	no positive selection	ENOG41095YY	NA
MvSl-1064-A1-R4_MC01-1g01926	AUTOSOME	noDE	no positive selection	NA	NA
MvSl-1064-A1-R4_MC01-1g01927	AUTOSOME	noDE	no positive selection	ENOG41091K0	RQC_domain
MvSl-1064-A1-R4_MC01-1g01928	AUTOSOME	noDE	no positive selection	ENOG41092YE	Spa2_homology_domain_(SHD)_of_GIT
MvSl-1064-A1-R4_MC01-1g01930	AUTOSOME	noDE	no positive selection	NA	NA
MvSl-1064-A1-R4_MC01-1g01932	AUTOSOME	noDE	no positive selection	ENOG41095ZK	Translation-initiation_factor_2
MvSl-1064-A1-R4_MC01-1g01933	AUTOSOME	noDE	no positive selection	NA	NA
MvSl-1064-A1-R4_MC01-1g01934	AUTOSOME	noDE	no positive selection	ENOG41091SX	Trifunctional_enzyme_bearing_the_Gln_amidotransferase_(GATase)_domain_of_anthranilate_synthase,_indole-glycerolphosphate_synthase,_and_phosphoribosylanthranilate_isomerase_activities
MvSl-1064-A1-R4_MC01-1g01936	AUTOSOME	noDE	no positive selection	ENOG41091S6	Structural_maintenance_of_chromosomes_protein
MvSl-1064-A1-R4_MC01-1g01943	AUTOSOME	noDE	no positive selection	ENOG41096CV	NA
MvSl-1064-A1-R4_MC01-1g01944	AUTOSOME	noDE	no positive selection	ENOG41091UW	HCO3-_transporter_family
MvSl-1064-A1-R4_MC01-1g01945	AUTOSOME	noDE	no positive selection	ENOG41091EP	Insulinase_(Peptidase_family_M16)
MvSl-1064-A1-R4_MC01-1g01947	AUTOSOME	noDE	no positive selection	ENOG41094HK	Tic20-like_protein
MvSl-1064-A1-R4_MC01-1g01948	AUTOSOME	noDE	no positive selection	ENOG41095UQ	Mannosyltransferase_putative
MvSl-1064-A1-R4_MC01-1g01949	AUTOSOME	noDE	no positive selection	ENOG41094B3	Vps51/Vps67
MvSl-1064-A1-R4_MC01-1g01951	AUTOSOME	noDE	no positive selection	ENOG41091GQ	PH
MvSl-1064-A1-R4_MC01-1g01952	AUTOSOME	noDE	no positive selection	ENOG41092A4	START_domain
MvSl-1064-A1-R4_MC01-1g01957	AUTOSOME	noDE	no positive selection	ENOG410950K	Protein_of_unknown_function_(DUF1237)
MvSl-1064-A1-R4_MC01-1g01958	AUTOSOME	noDE	no positive selection	ENOG41095XW	NA
MvSl-1064-A1-R4_MC01-1g01959	AUTOSOME	noDE	no positive selection	ENOG41091NU	Fungal_trans
MvSl-1064-A1-R4_MC01-1g01960	AUTOSOME	noDE	no positive selection	ENOG41093RS	Fungal_specific_transcription_factor_domain
MvSl-1064-A1-R4_MC01-1g01962	AUTOSOME	noDE	no positive selection	ENOG41095GN	Inherit_from_opiNOG:_cyclin_B1_interacting_protein_1,_E3_ubiquitin_protein_ligase
MvSl-1064-A1-R4_MC01-1g01963	AUTOSOME	noDE	no positive selection	ENOG410969W	ER_protein_Pkr1
MvSl-1064-A1-R4_MC01-1g01964	AUTOSOME	noDE	no positive selection	NA	NA
MvSl-1064-A1-R4_MC01-1g01966	AUTOSOME	noDE	no positive selection	ENOG410947F	NA
MvSl-1064-A1-R4_MC01-1g01967	AUTOSOME	noDE	no positive selection	ENOG41092NA	NA
MvSl-1064-A1-R4_MC01-1g01968	AUTOSOME	noDE	no positive selection	ENOG41092W6	short_chain_dehydrogenase
MvSl-1064-A1-R4_MC01-1g01969	AUTOSOME	noDE	no positive selection	ENOG41091YM	Phenylalanine_ammonia-lyase
MvSl-1064-A1-R4_MC01-1g01972	AUTOSOME	noDE	no positive selection	ENOG41091N9	Dna_polymerase
MvSl-1064-A1-R4_MC01-1g01974	AUTOSOME	noDE	no positive selection	ENOG4109343	Inherit_from_NOG:_trafficking_protein_particle_complex
MvSl-1064-A1-R4_MC01-1g01984	AUTOSOME	noDE	no positive selection	ENOG410939A	Aldose_1-epimerase
MvSl-1064-A1-R4_MC01-1g01985	AUTOSOME	noDE	no positive selection	ENOG41094W9	Major_Facilitator_Superfamily
MvSl-1064-A1-R4_MC01-1g01987	AUTOSOME	noDE	no positive selection	ENOG41091UJ	CAMK_CAMK1_protein_kinase
MvSl-1064-A1-R4_MC01-1g01988	AUTOSOME	noDE	no positive selection	ENOG41092B5	C2_domain
MvSl-1064-A1-R4_MC01-1g01989	AUTOSOME	noDE	no positive selection	ENOG41097TR	NA
MvSl-1064-A1-R4_MC01-1g01990	AUTOSOME	noDE	no positive selection	NA	NA
MvSl-1064-A1-R4_MC01-1g01998	AUTOSOME	noDE	no positive selection	ENOG41092WP	Saccharopine_dehydrogenase
MvSl-1064-A1-R4_MC01-1g01999	AUTOSOME	noDE	no positive selection	NA	NA
MvSl-1064-A1-R4_MC01-1g02000	AUTOSOME	noDE	no positive selection	ENOG41095RU	PINc
MvSl-1064-A1-R4_MC01-1g02001	AUTOSOME	noDE	no positive selection	ENOG41091VY	Diphthamide_biosynthesis_protein_1
MvSl-1064-A1-R4_MC01-1g02002	AUTOSOME	noDE	no positive selection	ENOG41093PG	Pyridine_nucleotide-disulphide_oxidoreductase
MvSl-1064-A1-R4_MC01-1g02011	AUTOSOME	noDE	no positive selection	ENOG4109533	S_TKc
MvSl-1064-A1-R4_MC01-1g02016	AUTOSOME	noDE	no positive selection	ENOG41093MV	Acyltransferase
MvSl-1064-A1-R4_MC01-1g02017	AUTOSOME	noDE	no positive selection	ENOG41094QE	RRM
MvSl-1064-A1-R4_MC01-1g02019	AUTOSOME	noDE	no positive selection	NA	NA
MvSl-1064-A1-R4_MC01-1g02020	AUTOSOME	noDE	no positive selection	ENOG410949N	Sds3-like
MvSl-1064-A1-R4_MC01-1g02021	AUTOSOME	noDE	no positive selection	ENOG41093X6	ARID
MvSl-1064-A1-R4_MC01-1g02029	AUTOSOME	noDE	no positive selection	ENOG410935S	Pfam:DUF1740
MvSl-1064-A1-R4_MC01-1g02030	AUTOSOME	noDE	no positive selection	ENOG4109342	Tubulin-tyrosine_ligase_family
MvSl-1064-A1-R4_MC01-1g02031	AUTOSOME	noDE	no positive selection	ENOG410913B	AMP_binding_protein
MvSl-1064-A1-R4_MC01-1g02033	AUTOSOME	noDE	no positive selection	NA	NA
MvSl-1064-A1-R4_MC01-1g02035	AUTOSOME	noDE	no positive selection	NA	NA
MvSl-1064-A1-R4_MC01-1g02036	AUTOSOME	noDE	no positive selection	ENOG410948R	Inherit_from_fuNOG:_Methyltransferase
MvSl-1064-A1-R4_MC01-1g02039	AUTOSOME	noDE	no positive selection	ENOG41098FM	NA
MvSl-1064-A1-R4_MC01-1g02044	AUTOSOME	noDE	no positive selection	ENOG4109383	Clathrin_adaptor_complex_small_chain
MvSl-1064-A1-R4_MC01-1g02045	AUTOSOME	noDE	no positive selection	ENOG41099B5	Major_Facilitator_Superfamily
MvSl-1064-A1-R4_MC01-1g02049	AUTOSOME	noDE	no positive selection	ENOG41092F6	Phospholipase_D_Active_site_motif
MvSl-1064-A1-R4_MC01-1g02050	AUTOSOME	noDE	no positive selection	ENOG41094J1	NA
MvSl-1064-A1-R4_MC01-1g02051	AUTOSOME	noDE	no positive selection	ENOG4109234	Flavin-binding_monooxygenase-like
MvSl-1064-A1-R4_MC01-1g02052	AUTOSOME	noDE	no positive selection	ENOG4109111	Clp_amino_terminal_domain
MvSl-1064-A1-R4_MC01-1g02053	AUTOSOME	noDE	no positive selection	ENOG41093HQ	tRNA_intron_endonuclease,_catalytic_C-terminal_domain
MvSl-1064-A1-R4_MC01-1g02054	AUTOSOME	noDE	no positive selection	ENOG41091M5	Mitochondrial_carrier_protein
MvSl-1064-A1-R4_MC01-1g02055	AUTOSOME	noDE	no positive selection	NA	NA
MvSl-1064-A1-R4_MC01-1g02056	AUTOSOME	noDE	no positive selection	NA	NA
MvSl-1064-A1-R4_MC01-1g02057	AUTOSOME	noDE	no positive selection	NA	NA
MvSl-1064-A1-R4_MC01-1g02058	AUTOSOME	noDE	no positive selection	ENOG410913E	Foie_gras_liver_health_family_1
MvSl-1064-A1-R4_MC01-1g02062	AUTOSOME	noDE	no positive selection	ENOG4109270	tRNA_synthetases_class_II_(D,_K_and_N)
MvSl-1064-A1-R4_MC01-1g02068	AUTOSOME	noDE	no positive selection	ENOG41094PU	NA
MvSl-1064-A1-R4_MC01-1g02071	AUTOSOME	noDE	no positive selection	ENOG41099DX	3,4-dihydroxy-2-butanone_4-phosphate_synthase
MvSl-1064-A1-R4_MC01-1g02072	AUTOSOME	noDE	no positive selection	ENOG4109256	HEAT_repeat
MvSl-1064-A1-R4_MC01-1g02073	AUTOSOME	noDE	no positive selection	ENOG41092J5	eRF1_domain_3
MvSl-1064-A1-R4_MC01-1g02074	AUTOSOME	noDE	no positive selection	ENOG41097WR	Protein_of_unknown_function_(DUF1242)
MvSl-1064-A1-R4_MC01-1g02076	AUTOSOME	noDE	no positive selection	ENOG41096XT	NA
MvSl-1064-A1-R4_MC01-1g02080	AUTOSOME	noDE	no positive selection	ENOG41092U6	Legume-like_lectin_family
MvSl-1064-A1-R4_MC01-1g02081	AUTOSOME	noDE	no positive selection	ENOG41092HQ	WD_domain,_G-beta_repeat
MvSl-1064-A1-R4_MC01-1g02084	AUTOSOME	noDE	no positive selection	ENOG41094CR	HSF
MvSl-1064-A1-R4_MC01-1g02085	AUTOSOME	noDE	no positive selection	ENOG41095A0	NA
MvSl-1064-A1-R4_MC01-1g02086	AUTOSOME	noDE	no positive selection	ENOG41091PS	Component_of_the_microsomal_membrane_bound_fatty_acid_elongation_system,_which_produces_the_26-carbon_very_long-chain_fatty_acids_(VLCFA)_from_palmitate._Catalyzes_the_reduction_of_the_3-ketoacyl-CoA_intermediate_that_is_formed_in_each_cycle_of_fatty_acid_elongation._VLCFAs_serve_as_precursors_for_ceramide_and_sphingolipids_(By_similarity)
MvSl-1064-A1-R4_MC01-1g02087	AUTOSOME	noDE	no positive selection	ENOG4109426	GATA_zinc_finger
MvSl-1064-A1-R4_MC01-1g02088	AUTOSOME	noDE	no positive selection	ENOG41091M4	Dna_polymerase
MvSl-1064-A1-R4_MC01-1g02091	AUTOSOME	noDE	no positive selection	ENOG41093JT	Haemolysin-III_related
MvSl-1064-A1-R4_MC01-1g02092	AUTOSOME	noDE	no positive selection	ENOG41094VX	K01061_carboxymethylenebutenolidase_EC_3.1.1.45
MvSl-1064-A1-R4_MC01-1g02093	AUTOSOME	noDE	no positive selection	ENOG41094JM	NA
MvSl-1064-A1-R4_MC01-1g02094	AUTOSOME	noDE	no positive selection	ENOG4109207	ATP-dependent_RNA_helicase_involved_in_mRNA_turnover,_and_more_specifically_in_mRNA_decapping._Is_involved_in_G1_S_DNA-_damage_checkpoint_recovery,_probably_through_the_regulation_of_the_translational_status_of_a_subset_of_mRNAs._May_also_have_a_role_in_translation_and_mRNA_nuclear_export_(By_similarity)
MvSl-1064-A1-R4_MC01-1g02095	AUTOSOME	noDE	no positive selection	ENOG410970A	NA
MvSl-1064-A1-R4_MC01-1g02100	AUTOSOME	noDE	no positive selection	ENOG41097GG	Fungal_Zn(2)-Cys(6)_binuclear_cluster_domain
MvSl-1064-A1-R4_MC01-1g02102	AUTOSOME	noDE	no positive selection	ENOG41094C8	Mpv17_/_PMP22_family
MvSl-1064-A1-R4_MC01-1g02103	AUTOSOME	noDE	no positive selection	ENOG4109304	Component_of_the_ERMES_MDM_complex,_which_serves_as_a_molecular_tether_to_connect_the_endoplasmic_reticulum_and_mitochondria._Components_of_this_complex_are_involved_in_the_control_of_mitochondrial_shape_and_protein_biogenesis_and_may_function_in_phospholipid_exchange._The_MDM12-MMM1_subcomplex_functions_in_the_major_beta-barrel_assembly_pathway_that_is_responsible_for_biogenesis_of_all_outer_mem…
MvSl-1064-A1-R4_MC01-1g02105	AUTOSOME	noDE	no positive selection	ENOG41094BI	RINGv
MvSl-1064-A1-R4_MC01-1g02106	AUTOSOME	noDE	no positive selection	ENOG41094CC	Nuclear_fragile_X_mental_retardation-interacting_protein_1_(NUFIP1)
MvSl-1064-A1-R4_MC01-1g02107	AUTOSOME	noDE	no positive selection	ENOG41092WF	EB1-like_C-terminal_motif
MvSl-1064-A1-R4_MC01-1g02109	AUTOSOME	noDE	no positive selection	ENOG410964X	NA
MvSl-1064-A1-R4_MC01-1g02110	AUTOSOME	noDE	no positive selection	ENOG410921C	FtsH_Extracellular
MvSl-1064-A1-R4_MC01-1g02112	AUTOSOME	noDE	no positive selection	NA	NA
MvSl-1064-A1-R4_MC01-1g02113	AUTOSOME	noDE	no positive selection	ENOG41093B2	Bud32_protein_kinase
MvSl-1064-A1-R4_MC01-1g02116	AUTOSOME	noDE	no positive selection	ENOG410919Q	CBF/Mak21_family
MvSl-1064-A1-R4_MC01-1g02117	AUTOSOME	noDE	no positive selection	NA	NA
MvSl-1064-A1-R4_MC01-1g02118	AUTOSOME	noDE	no positive selection	ENOG41093YQ	cAMP-independent_regulatory_protein
MvSl-1064-A1-R4_MC01-1g02119	AUTOSOME	noDE	no positive selection	NA	NA
MvSl-1064-A1-R4_MC01-1g02120	AUTOSOME	noDE	no positive selection	ENOG4109478	LIM
MvSl-1064-A1-R4_MC01-1g02121	AUTOSOME	noDE	no positive selection	ENOG41094IJ	Acetyltransferase_(GNAT)_family
MvSl-1064-A1-R4_MC01-1g02122	AUTOSOME	noDE	no positive selection	ENOG41097P4	NA
MvSl-1064-A1-R4_MC01-1g02124	AUTOSOME	noDE	no positive selection	NA	NA
MvSl-1064-A1-R4_MC01-1g02126	AUTOSOME	noDE	no positive selection	NA	NA
MvSl-1064-A1-R4_MC01-1g02127	AUTOSOME	noDE	no positive selection	NA	NA
MvSl-1064-A1-R4_MC01-1g02128	AUTOSOME	noDE	no positive selection	ENOG410913D	Protease_with_a_carboxypeptidase_B-like_function_involved_in_the_C-terminal_processing_of_the_lysine_and_arginine_residues_from_protein_precursors._Promotes_cell_fusion_and_is_involved_in_the_programmed_cell_death_(By_similarity)
MvSl-1064-A1-R4_MC01-1g02129	AUTOSOME	noDE	no positive selection	ENOG410931P	Inherit_from_fuNOG:_Methyltransferase_domain
MvSl-1064-A1-R4_MC01-1g02131	AUTOSOME	noDE	no positive selection	NA	NA
MvSl-1064-A1-R4_MC01-1g02132	AUTOSOME	noDE	no positive selection	ENOG41095SD	NA
MvSl-1064-A1-R4_MC01-1g02133	AUTOSOME	noDE	no positive selection	ENOG41091TZ	RGS
MvSl-1064-A1-R4_MC01-1g02134	AUTOSOME	noDE	no positive selection	NA	NA
MvSl-1064-A1-R4_MC01-1g02137	AUTOSOME	noDE	no positive selection	ENOG41091H7	Pfam:IML2
MvSl-1064-A1-R4_MC01-1g02139	AUTOSOME	noDE	no positive selection	ENOG41091IP	Mpp10_protein
MvSl-1064-A1-R4_MC01-1g02140	AUTOSOME	noDE	no positive selection	ENOG41094IJ	Acetyltransferase_(GNAT)_family
MvSl-1064-A1-R4_MC01-1g02141	AUTOSOME	noDE	no positive selection	ENOG4109505	DNA_photolyase
MvSl-1064-A1-R4_MC01-1g02146	AUTOSOME	noDE	no positive selection	ENOG41092UG	Mitochondrial_genome_maintenance_protein
MvSl-1064-A1-R4_MC01-1g02147	AUTOSOME	noDE	no positive selection	ENOG4109159	RasGAP_C-terminus
MvSl-1064-A1-R4_MC01-1g02148	AUTOSOME	noDE	no positive selection	ENOG41092UV	NADH_pyrophosphatase-like_rudimentary_NUDIX_domain
MvSl-1064-A1-R4_MC01-1g02149	AUTOSOME	noDE	no positive selection	ENOG41091IU	Pfam:DUF803
MvSl-1064-A1-R4_MC01-1g02150	AUTOSOME	noDE	no positive selection	ENOG410919H	Pfam:NPD
MvSl-1064-A1-R4_MC01-1g02152	AUTOSOME	noDE	no positive selection	NA	NA
MvSl-1064-A1-R4_MC01-1g02155	AUTOSOME	noDE	no positive selection	ENOG410939U	JmjC_domain,_hydroxylase
MvSl-1064-A1-R4_MC01-1g02156	AUTOSOME	noDE	no positive selection	ENOG41095RZ	Domain_of_unknown_function_(DUF427)
MvSl-1064-A1-R4_MC01-1g02157	AUTOSOME	noDE	no positive selection	ENOG410914E	Inherit_from_fuNOG:_A_transporter
MvSl-1064-A1-R4_MC01-1g02161	AUTOSOME	noDE	no positive selection	ENOG41094W8	capsular_associated_protein
MvSl-1064-A1-R4_MC01-1g02165	AUTOSOME	noDE	no positive selection	ENOG410919N	STE_STE7_MEK1_protein_kinase
MvSl-1064-A1-R4_MC01-1g02166	AUTOSOME	noDE	no positive selection	ENOG41095WN	Protein_of_unknown_function_(DUF3767)
MvSl-1064-A1-R4_MC01-1g02167	AUTOSOME	noDE	no positive selection	ENOG410980K	Inherit_from_COG:_Organic_hydroperoxide_resistance_protein
MvSl-1064-A1-R4_MC01-1g02168	AUTOSOME	noDE	no positive selection	ENOG410921I	Geranylgeranyl_diphosphate_synthase,_type_III
MvSl-1064-A1-R4_MC01-1g02181	AUTOSOME	noDE	no positive selection	ENOG410937V	Erv1_/_Alr_family
MvSl-1064-A1-R4_MC01-1g02182	AUTOSOME	noDE	no positive selection	ENOG410919A	CPSase_L_D3
MvSl-1064-A1-R4_MC01-1g02183	AUTOSOME	noDE	no positive selection	NA	NA
MvSl-1064-A1-R4_MC01-1g02185	AUTOSOME	noDE	no positive selection	ENOG41095YD	NA
MvSl-1064-A1-R4_MC01-1g02188	AUTOSOME	noDE	no positive selection	ENOG4109555	guanine_nucleotide-binding_protein
MvSl-1064-A1-R4_MC01-1g02189	AUTOSOME	noDE	no positive selection	ENOG410914P	Sodium_Bile_acid_symporter_family
MvSl-1064-A1-R4_MC01-1g02191	AUTOSOME	noDE	no positive selection	ENOG41092X2	Pfam:DUF1709
MvSl-1064-A1-R4_MC01-1g02193	AUTOSOME	noDE	no positive selection	ENOG41091WN	K01465_dihydroorotase_EC_3.5.2.3
MvSl-1064-A1-R4_MC01-1g02195	AUTOSOME	noDE	no positive selection	NA	NA
MvSl-1064-A1-R4_MC01-1g02196	AUTOSOME	noDE	no positive selection	ENOG410912C	S_TK_X
MvSl-1064-A1-R4_MC01-1g02198	AUTOSOME	noDE	no positive selection	ENOG410932Y	Aldo/keto_reductase_family
MvSl-1064-A1-R4_MC01-1g02199	AUTOSOME	noDE	no positive selection	NA	NA
MvSl-1064-A1-R4_MC01-1g02200	AUTOSOME	noDE	no positive selection	ENOG41099D7	Putative_methyltransferase
MvSl-1064-A1-R4_MC01-1g02201	AUTOSOME	noDE	no positive selection	ENOG41094N0	P4Hc
MvSl-1064-A1-R4_MC01-1g02202	AUTOSOME	noDE	no positive selection	ENOG41094H1	NA
MvSl-1064-A1-R4_MC01-1g02203	AUTOSOME	noDE	no positive selection	ENOG410927U	Protein_of_unknown_function_(DUF2421)
MvSl-1064-A1-R4_MC01-1g02204	AUTOSOME	noDE	no positive selection	ENOG41094RE	NA
MvSl-1064-A1-R4_MC01-1g02205	AUTOSOME	noDE	no positive selection	ENOG41091JY	General_RNA_polymerase_II_transcription_factor
MvSl-1064-A1-R4_MC01-1g02209	AUTOSOME	noDE	no positive selection	ENOG41092S5	Vps52_/_Sac2_family
MvSl-1064-A1-R4_MC01-1g02210	AUTOSOME	noDE	no positive selection	ENOG4109334	Inherit_from_fuNOG:_Importin_11
MvSl-1064-A1-R4_MC01-1g02212	AUTOSOME	noDE	no positive selection	ENOG41099C2	FH2
MvSl-1064-A1-R4_MC01-1g02216	AUTOSOME	noDE	no positive selection	ENOG41092M6	cellular_lipid_catabolic_process
MvSl-1064-A1-R4_MC01-1g02217	AUTOSOME	noDE	no positive selection	NA	NA
MvSl-1064-A1-R4_MC01-1g02218	AUTOSOME	noDE	no positive selection	ENOG41093H9	Snare_region_anchored_in_the_vesicle_membrane_C-terminus
MvSl-1064-A1-R4_MC01-1g02219	AUTOSOME	noDE	no positive selection	ENOG410924W	Uso1_/_p115_like_vesicle_tethering_protein,_head_region
MvSl-1064-A1-R4_MC01-1g02220	AUTOSOME	noDE	no positive selection	ENOG41093DC	Bromodomain
MvSl-1064-A1-R4_MC01-1g02223	AUTOSOME	noDE	no positive selection	ENOG410933C	Enoyl-CoA_hydratase/isomerase_family
MvSl-1064-A1-R4_MC01-1g02224	AUTOSOME	noDE	no positive selection	ENOG41093DD	Vacuolar_import_and_degradation_protein
MvSl-1064-A1-R4_MC01-1g02225	AUTOSOME	noDE	no positive selection	ENOG4109274	HEAT_repeat
MvSl-1064-A1-R4_MC01-1g02227	AUTOSOME	noDE	no positive selection	ENOG41099AM	DegT/DnrJ/EryC1/StrS_aminotransferase_family
MvSl-1064-A1-R4_MC01-1g02230	AUTOSOME	noDE	no positive selection	ENOG41091EK	14-3-3_protein
MvSl-1064-A1-R4_MC01-1g02232	AUTOSOME	noDE	no positive selection	ENOG41092P1	Inherit_from_fuNOG:_Cleavage_and_polyadenylation
MvSl-1064-A1-R4_MC01-1g02234	AUTOSOME	noDE	no positive selection	ENOG41091BT	Retinoic_acid_induced_16-like_protein
MvSl-1064-A1-R4_MC01-1g02236	AUTOSOME	noDE	no positive selection	ENOG41093B8	Protein_of_unknown_function_(DUF2370)
MvSl-1064-A1-R4_MC01-1g02237	AUTOSOME	noDE	no positive selection	ENOG410942S	Inherit_from_NOG:_amyloid_beta_(A4)_precursor_protein-binding,_family_B,_member_1_interacting_protein
MvSl-1064-A1-R4_MC01-1g02238	AUTOSOME	noDE	no positive selection	NA	NA
MvSl-1064-A1-R4_MC01-1g02239	AUTOSOME	noDE	no positive selection	ENOG41091Y8	Mitochondrial_protein_Pet127
MvSl-1064-A1-R4_MC01-1g02240	AUTOSOME	noDE	no positive selection	NA	NA
MvSl-1064-A1-R4_MC01-1g02241	AUTOSOME	noDE	no positive selection	ENOG41099D2	AAA
MvSl-1064-A1-R4_MC01-1g02244	AUTOSOME	noDE	no positive selection	ENOG41091PX	Guanine_nucleotide-binding_proteins_(G_proteins)_are_involved_as_modulators_or_transducers_in_various_transmembrane_signaling_systems
MvSl-1064-A1-R4_MC01-1g02245	AUTOSOME	noDE	no positive selection	ENOG41093K2	Sm
MvSl-1064-A1-R4_MC01-1g02248	AUTOSOME	noDE	no positive selection	ENOG410922V	KR_domain
MvSl-1064-A1-R4_MC01-1g02249	AUTOSOME	noDE	no positive selection	ENOG410913V	NOL1/NOP2/sun_family
MvSl-1064-A1-R4_MC01-1g02251	AUTOSOME	noDE	no positive selection	ENOG4109236	oligopeptide_transporter
MvSl-1064-A1-R4_MC01-1g02252	AUTOSOME	noDE	no positive selection	ENOG41094E6	Acetyltransferase_(GNAT)_family
MvSl-1064-A1-R4_MC01-1g02253	AUTOSOME	noDE	no positive selection	ENOG41095QR	Pfam:DUF3743
MvSl-1064-A1-R4_MC01-1g02256	AUTOSOME	noDE	no positive selection	ENOG41094E3	Acyl_transferase_domain
MvSl-1064-A1-R4_MC01-1g02257	AUTOSOME	noDE	no positive selection	ENOG41091CA	STAS_domain
MvSl-1064-A1-R4_MC01-1g02261	AUTOSOME	noDE	no positive selection	ENOG410937E	RNA_polymerase_III_transcription_factor_(TF)IIIC_subunit
MvSl-1064-A1-R4_MC01-1g02263	AUTOSOME	noDE	no positive selection	ENOG41099CQ	E1-E2_ATPase
MvSl-1064-A1-R4_MC01-1g02264	AUTOSOME	noDE	no positive selection	ENOG41094UI	Fungal_trichothecene_efflux_pump_(TRI12)
MvSl-1064-A1-R4_MC01-1g02265	AUTOSOME	noDE	no positive selection	ENOG41094JT	NA
MvSl-1064-A1-R4_MC01-1g02268	AUTOSOME	noDE	no positive selection	ENOG41092H8	Involved_in_ds_DNA_break_repair._Has_a_role_in_non-_homologous_integration_(NHI)_pathways_where_it_is_required_in_the_final_step_of_non-homologus_end-joining
MvSl-1064-A1-R4_MC01-1g02269	AUTOSOME	noDE	no positive selection	ENOG410940M	Rdx_family
MvSl-1064-A1-R4_MC01-1g02270	AUTOSOME	noDE	no positive selection	ENOG41093T4	Zinc-binding_dehydrogenase
MvSl-1064-A1-R4_MC01-1g02272	AUTOSOME	noDE	no positive selection	ENOG4109409	Mitochondrial_carrier_protein
[truncated: 6,576 more rows]

## Sheet: S4 wilcoxon upregulated tests
Table S4: Wilcoxon tests comparing the strength of haploid upregulation in Microbotryum lychnidis-dioicae between genomic compartments
in the two media
Medium	Genomic compartments to be compared	W	P value
Rich	Autosomal vs Black	3400	0.6399
Rich	Colored vs Autosomal	468	0.2611
Rich	Colored vs Black	27	0.4576
Water	Autosomal vs Black	0	0.02857

## Sheet: S5 wilcoxon a1a2 tests
Table S5: Wilcoxon test comparing the strength of a1-a2 expression level difference in
Microbotryum lychnidis-dioicae in the two media and in the different types of strata
Medum	strata	W	P value
rich	black	11935	0.979
rich	colored	174	0.1049
water	black	13306	0.1652
water	colored	217	0.5088

## Sheet: S6 A1-a2 
Table S6: Genes differentially expressed in Microbotryum lychnidis-dioicae between a1 and a2 cells, the corresponding condition (medium),
genomic compartment, q-value, beta value and its standard error (SE), gene and orthologous group ID and predicted function
Gene ID	Genomic compartment	Condition	q-value	beta	SE (beta)	Orthologous group ID	Predicted function
MvSl-1064-A1-R4_A1g00306	MAT gene	Water	0.00081	-8.499	0.305	ORTHAg04542	pheromone receptor
MvSl-1064-A1-R4_MC06g07137	AUTOSOME	Water	0.00081	-3.440	0.124	ORTHAg05699	Carboxylesterase family
MvSl-1064-A1-R4_A1g00313	BLACK	Water	0.00084	-4.626	0.158	ORTHAg08317	NA
MvSl-1064-A1-R4_MC01-1g02832	AUTOSOME	Water	0.00091	3.349	0.131	ORTHAg08244	NA
MvSl-1064-A1-R4_A1g00127	BLACK	Water	0.00030	-8.706	0.170	ORTHAg06723	NA
MvSl-1064-A1-R4_A1g00174	BLACK	Water	0.00036	-8.669	0.199	ORTHAg06723	NA
MvSl-1064-A1-R4_A1g00173	BLACK	Water	0.00081	-8.298	0.277	ORTHAg17945	NA
MvSl-1064-A1-R4_A1g01318	BLACK	Water	0.00095	4.409	0.189	ORTHAg10866	Ulp1 protease family, C-terminal catalytic domain

## Sheet: S7  LRT without filter
Table S7: Genes with significant signs of positive selection before filtering for too high estimated dN/dS values, detected either in a1 or a2 genomes in the black or colored strata in Microbotryum lychnidis-dioicae, with stratum, gene, dN/dS values
estimated in the different model classes (0, 1, 2a or 2b), the mean dN/dS in the gene (ω), the maximum likelihoods for the model with or without selection, the likelihood ratio test (LRT) value, whether the gene is upregulated in a haploid phase or not
(noDE), and predicted function.
Gene ID	Genomic compartment	selection detected	0	1	2a	2b	0	1	2a	2b	ω (sum( among classes (proportion * estimated ω) ))	Maximum log likelihood (null model)	Maximum log likelihood (alternative model)	LRT (2*(abs(Maximum log likelihood (null model) - Maximum log likelihood (alternative model)))	DE state	EggNOG ID – Basidiomycota specific DB (basNOG)	EggNOG functionnal annotation – Basidiomycota specific DB (basNOG)
MvSl-1064-A1-R4_A1g00165	BLACK	a1	0.84522	0.14314	0.00995	0.00168	0.00229	1.00000	999.00000	999.00000	11.7634	-4342.757818	-4310.120127	65.2754	noDE	ENOG41092AG	Sodium_hydrogen_exchanger
MvSl-1064-A1-R4_A1g00281	BLACK	a1	0.66894	0.31839	0.00858	0.00408	0.00000	1.00000	708.99209	708.99209	9.29423	-6738.541436	-6707.624345	61.8342	noDE	ENOG41091XF	ATPase_family_associated_with_various_cellular_activities_(AAA)
MvSl-1064-A1-R4_A1g00349	BLACK	a1	0.66966	0.28048	0.03514	0.01472	0.00000	1.00000	999.00000	999.00000	50.0906	-1344.300734	-1319.807618	48.9862	noDE	ENOG410930D	GPR1/FUN34/yaaH_family
MvSl-1064-A1-R4_A1g00433	BLACK	a1	0.64345	0.28906	0.04657	0.02092	0.26931	1.00000	24.97562	24.97562	2.14795	-3118.504443	-3116.237171	4.53454	noDE	ENOG41095VR	snRNA-activating_protein_of_50kDa_MW_C_terminal
MvSl-1064-A1-R4_A1g00507	BLACK	a1	0.71127	0.27420	0.01048	0.00404	0.17339	1.00000	89.06806	89.06806	1.6908	-6179.664075	-6170.251518	18.8251	noDE	ENOG41097HS	UBCc
MvSl-1064-A1-R4_A1g00508	BLACK	a1	0.81376	0.14554	0.03453	0.00617	0.00000	1.00000	34.64361	34.64361	1.55553	-2904.067355	-2898.976067	10.1826	noDE	ENOG41091Z1	monooxygenase
MvSl-1064-A1-R4_A1g00513	BLACK	a1	0.66424	0.32458	0.00751	0.00367	0.00000	1.00000	999.00000	999.00000	11.4934	-3308.315639	-3295.759318	25.1126	noDE	ENOG41092U7	Pfam:DUF803
MvSl-1064-A1-R4_A1g00516	BLACK	a1	0.87991	0.11015	0.00883	0.00111	0.04523	1.00000	853.35414	853.35414	8.63229	-1785.701519	-1780.045189	11.3127	noDE	ENOG410930F	UBX
MvSl-1064-A1-R4_A1g00541	BLACK	a1	0.87978	0.10981	0.00926	0.00116	0.12500	1.00000	30.76141	30.76141	0.540316	-11574.879872	-11572.940238	3.87927	noDE	ENOG41091ZU	Inherit_from_fuNOG:_negative_regulator_of_mitosis
MvSl-1064-A1-R4_A1g00660	BLACK	a1	0.55057	0.42036	0.01649	0.01259	0.00000	1.00000	42.62529	42.62529	1.6599	-1537.381053	-1533.859225	7.04366	noDE	ENOG41091Z5	Uncharacterised_protein_family_(UPF0160)
MvSl-1064-A1-R4_A1g00841	BLACK	a1	0.41925	0.54387	0.01606	0.02083	0.42329	1.00000	22.79480	22.79480	1.56223	-1650.490062	-1648.081871	4.81638	noDE	ENOG41098M6	Membrane_transport_protein
MvSl-1064-A1-R4_A1g00921	BLACK	a1	0.97098	0.00000	0.02902	0.00000	0.20507	1.00000	123.99665	123.99665	3.7975	-2868.046314	-2852.199522	31.6936	noDE	ENOG410936C	GAT_domain
MvSl-1064-A1-R4_A1g00955	BLACK	a1	0.83092	0.00000	0.16908	0.00000	0.22858	1.00000	999.00000	999.00000	169.101	-551.102473	-532.681315	36.8423	noDE	ENOG41093N2	May_be_involved_in_cellular_response_to_stress._Required_to_maintain_mitochondrial_DNA_(mtDNA)_integrity_and_stability_(By_similarity)
MvSl-1064-A1-R4_A1g01021	BLACK	a1	0.46677	0.48366	0.02434	0.02523	0.00000	1.00000	99.59139	99.59139	5.42041	-914.972954	-912.001509	5.94289	noDE	NA	NA
MvSl-1064-A1-R4_A1g01129	BLACK	a1	0.62195	0.37805	0.00000	0.00000	0.07940	1.00000	1.00000	1.00000	0.427433	-4210.118774	-4207.769636	4.69828	noDE	ENOG41094EA	CS_domain
MvSl-1064-A1-R4_A1g01135	BLACK	a1	0.92539	0.00000	0.07461	0.00000	0.31215	1.00000	999.00000	999.00000	74.8243	-1811.010758	-1769.688917	82.6437	noDE	ENOG41093ZQ	Peptidase_C65_Otubain
MvSl-1064-A1-R4_A1g01173	BLACK	a1	0.78472	0.20066	0.01165	0.00298	0.06818	1.00000	264.54250	264.54250	4.12442	-2723.092786	-2715.391510	15.4026	noDE	ENOG4109330	RNA_recognition_motif._(a.k.a._RRM,_RBD,_or_RNP_domain)
MvSl-1064-A1-R4_A1g01347	BLACK	a1	0.85600	0.14219	0.00155	0.00026	0.20910	1.00000	148.61588	148.61588	0.590174	-10860.767144	-10856.612828	8.30863	noDE	ENOG41091U8	Involved_in_nucleolar_processing_of_pre-18S_ribosomal_RNA._Involved_in_ribosome_biosynthesis_(By_similarity)
MvSl-1064-A1-R4_A1g01404	BLACK	a1	0.73029	0.21027	0.04615	0.01329	0.33731	1.00000	999.00000	999.00000	59.8372	-2403.475208	-2355.356827	96.2368	noDE	ENOG41096CV	NA
MvSl-1064-A2-R4_A2g00314	BLACK	a2	0.44975	0.53376	0.00754	0.00895	0.22472	1.00000	60.07095	60.07095	1.6254	-2554.776623	-2552.591073	4.3711	noDE	ENOG4109381	Pre-mRNA-splicing_factor_CWC25
MvSl-1064-A2-R4_A2g00315	BLACK	a2	0.85045	0.13109	0.01600	0.00247	0.19347	1.00000	453.90597	453.90597	8.67927	-1019.676803	-1011.072601	17.2084	noDE	ENOG41095JU	Peptidase_of_plants_and_bacteria
MvSl-1064-A2-R4_A2g00403	BLACK	a2	0.41583	0.57961	0.00190	0.00265	0.00000	1.00000	218.37558	218.37558	1.57322	-1720.212996	-1717.438839	5.54831	noDE	ENOG41094AZ	Helix-loop-helix_DNA-binding_domain
MvSl-1064-A2-R4_A2g00560	BLACK	a2	0.39979	0.30494	0.16751	0.12777	0.03993	1.00000	123.70241	123.70241	36.8478	-467.876692	-463.845365	8.06265	noDE	NA	NA
MvSl-1064-A2-R4_A2g00567	BLACK	a2	0.50889	0.45302	0.02015	0.01794	0.00000	1.00000	999.00000	999.00000	38.5049	-2039.603315	-2036.399331	6.40797	noDE	ENOG41095TJ	NA
MvSl-1064-A2-R4_A2g00643	BLACK	a2	0.59036	0.40474	0.00291	0.00200	0.00000	1.00000	476.95309	476.95309	2.74658	-1737.308748	-1733.162840	8.29182	noDE	ENOG41092T3	Cellulase_(glycosyl_hydrolase_family_5)
MvSl-1064-A2-R4_A2g00651	BLACK	a2	0.69023	0.30185	0.00551	0.00241	0.00000	1.00000	999.00000	999.00000	8.21393	-4060.918278	-4053.680841	14.4749	noDE	ENOG410923J	Lon_protease_(S16)_C-terminal_proteolytic_domain
MvSl-1064-A2-R4_A2g00821	BLACK	a2	0.60204	0.36963	0.01755	0.01078	0.17746	1.00000	999.00000	999.00000	28.7781	-2402.497848	-2398.269445	8.45681	noDE	NA	NA
MvSl-1064-A2-R4_A2g00841	BLACK	a2	0.98322	0.00000	0.01678	0.00000	0.07476	1.00000	36.29650	36.29650	0.682561	-3961.797507	-3957.371260	8.85249	noDE	ENOG410928I	DNA_replication_licensing_factor_cdc19
MvSl-1064-A2-R4_A2g00864	BLACK	a2	0.67834	0.24376	0.05730	0.02059	0.00000	1.00000	999.00000	999.00000	78.0559	-2016.957095	-1961.736458	110.441	noDE	ENOG41093JM	Fumarylacetoacetate_(FAA)_hydrolase_family
MvSl-1064-A2-R4_A2g00914	BLACK	a2	0.95966	0.00000	0.04034	0.00000	0.44376	1.00000	139.23368	139.23368	6.04255	-948.209339	-943.176772	10.0651	noDE	ENOG410947Z	Essential_protein_Yae1,_N_terminal
MvSl-1064-A2-R4_A2g00915	BLACK	a2	0.72106	0.25505	0.01764	0.00624	0.11469	1.00000	22.38536	22.38536	0.872311	-7663.306848	-7660.105905	6.40189	noDE	ENOG41091C9	Kelch_motif
MvSl-1064-A2-R4_A2g00923	BLACK	a2	0.85140	0.13460	0.01209	0.00191	0.06733	1.00000	77.45594	77.45594	1.27631	-2266.255802	-2258.440465	15.6307	noDE	ENOG41093ZE	Inherit_from_COG:_alpha_beta_hydrolase_fold-3_domain_protein
MvSl-1064-A2-R4_A2g01002	BLACK	a2	0.14736	0.84411	0.00127	0.00727	0.00000	1.00000	112.29007	112.29007	1.80307	-4194.477383	-4189.235128	10.4845	noDE	ENOG41094DI	ZnF_C3H1
MvSl-1064-A2-R4_A2g01028	BLACK	a2	0.98895	0.00000	0.01105	0.00000	0.37456	1.00000	476.00063	476.00063	5.63023	-4206.742558	-4182.022322	49.4405	noDE	ENOG41094EA	CS_domain
MvSl-1064-A2-R4_A2g01271	BLACK	a2	0.86233	0.07817	0.05456	0.00495	0.02393	1.00000	157.73505	157.73505	9.48562	-2897.185101	-2859.025270	76.3197	noDE	ENOG41091Z1	monooxygenase
MvSl-1064-A2-R4_A2g01273	BLACK	a2	0.69404	0.21967	0.06554	0.02075	0.01282	1.00000	999.00000	999.00000	86.4323	-1871.574861	-1806.190989	130.768	noDE	ENOG41094TM	Phosphatidylserine_decarboxylase
MvSl-1064-A2-R4_A2g01322	BLACK	a2	0.97709	0.00000	0.02291	0.00000	0.16002	1.00000	519.43520	519.43520	12.0566	-1684.742686	-1663.781739	41.9219	noDE	ENOG410955X	Inherit_from_fuNOG:_integral_membrane_protein
MvSl-1064-A2-R4_A2g01388	BLACK	a2	0.52466	0.42921	0.02537	0.02076	0.00000	1.00000	977.69091	977.69091	45.5301	-1771.967453	-1742.700099	58.5347	noDE	ENOG41099CK	LIM_domain
MvSl-1064-A2-R4_A2g01393	BLACK	a2	0.72784	0.27216	0.00000	0.00000	0.02906	1.00000	1.00000	1.00000	0.293311	-2728.237185	-2724.199481	8.07541	noDE	ENOG4109330	RNA_recognition_motif._(a.k.a._RRM,_RBD,_or_RNP_domain)
MvSl-1064-A2-R4_A2g01431	BLACK	a2	0.83480	0.15881	0.00537	0.00102	0.00000	1.00000	107.95886	107.95886	0.848667	-6891.661192	-6880.601610	22.1192	noDE	ENOG410917H	Pfam:DUF1605
MvSl-1064-A2-R4_A2g01433	BLACK	a2	0.60941	0.38591	0.00287	0.00182	0.01724	1.00000	169.06985	169.06985	1.18935	-2959.885330	-2957.365356	5.03995	noDE	ENOG4109374	Mur_ligase_middle_domain
MvSl-1064-A2-R4_A2g01564	BLACK	a2	0.97799	0.00000	0.02201	0.00000	0.54444	1.00000	999.00000	999.00000	22.5204	-5043.130097	-4994.379515	97.5012	noDE	ENOG4109574	NA
MvSl-1064-A2-R4_A2g01580	BLACK	a2	0.98924	0.00000	0.01076	0.00000	0.34056	1.00000	999.00000	999.00000	11.0861	-2414.435387	-2402.682534	23.5057	noDE	ENOG41095KI	NA
MvSl-1064-A2-R4_A2g01642	BLACK	a2	0.64576	0.33261	0.01428	0.00735	0.00000	1.00000	289.07519	289.07519	6.58531	-3058.740833	-3046.565367	24.3509	noDE	ENOG4109552	Inherit_from_fuNOG:_transcription_factor_RfeF
MvSl-1064-A2-R4_A2g00826	BLACK	a2	0.90742	0.00000	0.09258	0.00000	0.38647	1.00000	20.73009	20.73009	2.26988	-2333.519262	-2331.261131	4.51626	upregulated	NA	NA
MvSl-1064-A2-R4_A2g01083	BLACK	a2	0.89133	0.09806	0.00956	0.00105	0.00000	1.00000	99.28388	99.28388	1.15146	-733.423476	-730.707258	5.43244	upregulated	ENOG41092P3	Eukaryotic_elongation_factor_5A_hypusine,_DNA-binding_OB_fold
MvSl-1064-A2-R4_A2g01305	BLACK	a2	0.60158	0.37081	0.01708	0.01053	0.00000	1.00000	75.68430	75.68430	2.46045	-3202.383920	-3196.809209	11.1494	upregulated	ENOG41093M3	60Kd_inner_membrane_protein
MvSl-1064-A1-R4_A1g00478	BLUE	a1	0.74677	0.24186	0.00859	0.00278	0.03684	1.00000	304.63652	304.63652	3.73309	-4257.991988	-4251.418151	13.1477	noDE	ENOG410932B	Thioredoxin
MvSl-1064-A1-R4_A1g00593	BLUE	a1	0.92876	0.06710	0.00386	0.00028	0.06492	1.00000	131.75112	131.75112	0.672845	-6595.999900	-6592.934677	6.13045	noDE	ENOG410918C	Possesses_5'-_3'_exoribonuclease_activity._Required_for_the_processing_of_nuclear_mRNA_and_rRNA_precursors._May_promote_termination_of_transcription_by_RNA_polymerase_II_(By_similarity)
MvSl-1064-A1-R4_A1g00997	BLUE	a1	0.22505	0.66861	0.02678	0.07956	0.00000	1.00000	9.93991	9.93991	1.72562	-3653.458982	-3651.518607	3.88075	noDE	ENOG41092BN	TKL_protein_kinase
MvSl-1064-A2-R4_A2g00832	BLUE	a2	0.97364	0.00000	0.02636	0.00000	0.10504	1.00000	999.00000	999.00000	26.4359	-974.829448	-969.161656	11.3356	noDE	ENOG41094AD	Tim17/Tim22/Tim23/Pmp24_family
MvSl-1064-A2-R4_A2g00195	ORANGE	a2	0.69541	0.26786	0.02651	0.01021	0.00000	1.00000	22.53786	22.53786	1.09545	-1558.446043	-1556.427745	4.0366	noDE	ENOG41095UD	NA
MvSl-1064-A2-R4_A2g01419	ORANGE	a2	0.65175	0.34057	0.00504	0.00263	0.12450	1.00000	32.87221	32.87221	0.673843	-11706.292245	-11702.659326	7.26584	noDE	ENOG41093AN	NA
MvSl-1064-A2-R4_A2g00431	PURPLE	a2	0.57132	0.37282	0.03380	0.02206	0.00000	1.00000	999.00000	999.00000	56.177	-1576.901583	-1539.959808	73.8836	noDE	ENOG41093R2	endonuclease_activity
MvSl-1064-A1-R4_A1g00230	PURPLE	a1	0.76679	0.21977	0.01044	0.00299	0.00000	1.00000	999.00000	999.00000	13.6363	-1367.518995	-1362.376265	10.2855	upregulated	ENOG410932J	Histone_chaperone_that_facilitates_histone_deposition_and_histone_exchange_and_removal_during_nucleosome_assembly_and_disassembly_(By_similarity)
MvSl-1064-A1-R4_A1g00389	RED	a1	0.99259	0.00000	0.00741	0.00000	0.24679	1.00000	999.00000	999.00000	7.64755	-1536.400679	-1528.974466	14.8524	noDE	ENOG410933U	NIF3_(NGG1p_interacting_factor_3)
MvSl-1064-A1-R4_A1g00407	RED	a1	0.48173	0.45976	0.02994	0.02857	0.06341	1.00000	999.00000	999.00000	58.9418	-1634.778203	-1588.609256	92.3379	noDE	ENOG41095FF	Ribonuclease_III_domain
MvSl-1064-A2-R4_A2g00124	RED	a2	0.76666	0.18406	0.03974	0.00954	0.00000	1.00000	999.00000	999.00000	49.4148	-3134.153123	-3062.136905	144.032	noDE	ENOG41098JI	Major_Facilitator_Superfamily
